# Supplementary material
Source: bioRxiv or medRxiv preprint supplement (https://www.biorxiv.org/highwire/filestream/80748/field_highwire_adjunct_files/0/242230-1.pdf)
Supplement: Supplementary file [file 242230-1.pdf]

1 **The genome of the water strider *Gerris buenoi* reveals expansions of**  
 2 **gene repertoires associated with adaptations to life on the water**

|    |                                                                                |    |
|----|--------------------------------------------------------------------------------|----|
| 3  |                                                                                |    |
| 4  | <b>Supplementary Data</b> .....                                                | 2  |
| 5  | Immune genes .....                                                             | 2  |
| 6  | Early Developmental Genes.....                                                 | 4  |
| 7  | Nuclear receptors and bHLH-PAS proteins .....                                  | 5  |
| 8  | Insulin/TOR signalling pathways .....                                          | 6  |
| 9  | Wnt Signaling Pathway .....                                                    | 7  |
| 10 | Cysteine peptidases from the papain C1 family .....                            | 9  |
| 11 | Visual genes .....                                                             | 11 |
| 12 | Chemoreceptor gene families.....                                               | 16 |
| 13 | Detoxification pathways .....                                                  | 19 |
| 14 | Wing development and polyphenism .....                                         | 23 |
| 15 | DNA methyltransferases .....                                                   | 25 |
| 16 | Histone genes and histone modification machinery .....                         | 26 |
| 17 | Antioxidant Proteins .....                                                     | 28 |
| 18 | <b>Supplementary Methods</b> .....                                             | 30 |
| 19 | Genome sequencing and assembly .....                                           | 30 |
| 20 | Automated Gene Annotation Using a Maker 2.0 Pipeline Tuned for Arthropods..... | 31 |
| 21 | Community annotation and Official Gene Set generation .....                    | 33 |
| 22 | Bristle genes.....                                                             | 33 |
| 23 | Cuticular proteins .....                                                       | 33 |
| 24 | Prey detection and selection on water environments .....                       | 34 |
| 25 | Wing polyphenism .....                                                         | 35 |
| 26 | Wnt Signaling Pathway .....                                                    | 36 |
| 27 | Early Developmental Genes.....                                                 | 37 |
| 28 | Antioxidant genes .....                                                        | 38 |
| 29 | <b>Supplementary Figures and Tables</b> .....                                  | 39 |
| 30 | Supplementary Figure 1 .....                                                   | 39 |
| 31 | Supplementary Figure 2.....                                                    | 40 |
| 32 | Supplementary Figure 3 .....                                                   | 41 |
| 33 | Supplementary Figure 5.....                                                    | 46 |
| 34 | Supplementary Figure 6.....                                                    | 47 |
| 35 | Supplementary Figure 7 .....                                                   | 48 |
| 36 | Supplementary Figure 8.....                                                    | 49 |
| 37 | Supplementary Figure 9.....                                                    | 50 |
| 38 | Supplementary Figure 10.....                                                   | 51 |

|    |                               |    |
|----|-------------------------------|----|
| 39 | Supplementary Figure 11 ..... | 52 |
| 40 | Supplementary Table 1 .....   | 53 |
| 41 | Supplementary Table 2 .....   | 54 |
| 42 | Supplementary Table 3 .....   | 56 |
| 43 | Supplementary Table 4 .....   | 60 |
| 44 | Supplementary Table 5 .....   | 61 |
| 45 | Supplementary Table 6 .....   | 62 |
| 46 | Supplementary Table 7 .....   | 63 |
| 47 | Supplementary Table 8 .....   | 64 |
| 48 | Supplementary Table 10 .....  | 66 |
| 49 | Supplementary Table 11 .....  | 69 |
| 50 | Supplementary Table 12 .....  | 71 |
| 51 | Supplementary Table 13 .....  | 74 |
| 52 | Supplementary Table 14 .....  | 76 |
| 53 | Supplementary Table 15 .....  | 83 |
| 54 | Supplementary Table 16 .....  | 84 |
| 55 | Supplementary Table 17 .....  | 85 |
| 56 | Supplementary Table 18 .....  | 87 |
| 57 | <b>References</b> .....       | 88 |
| 58 |                               |    |

## 59 **Supplementary Data**

### 60 **Immune genes**

61 While mammals have both innate and adaptive immune response, only innate immune response  
 62 has been described in arthropods <sup>1</sup>. In particular, the Toll and IMD (Immunodeficiency) pathways  
 63 are the two major regulators of the immune response known in arthropods <sup>2-4</sup> which act by  
 64 regulating the expression of other effector molecules such as antimicrobial peptides (AMPs).

65 In the *Gerris buenoi* genome we could annotate more than 60 immune genes, including orthologs  
 66 of all components of the Toll signalling pathway, which is activated mainly by Gram-positive  
 67 bacteria and fungi <sup>5,6</sup>. However, whereas the Toll1-4 receptors were only represented by a single  
 68 ortholog called Toll1, six Toll9 paralogs were found which raises important questions about a  
 69 possible adaptation to gram-positive bacteria present in the water. On the other hand, IMD

70 pathway responds mainly to Gram-negative bacteria infection <sup>5,6</sup> but many of its genes, including  
71 *IMD*, *dFADD*, *Dredd*, and *Relish* could not be found in the first sequenced hemipteran,  
72 *Acyrtosiphon pisum* <sup>7,8</sup>. Further sequencing of other hemipterans extended this absence to the  
73 kissing bug *Rodnius prolixus* and the bed bug *Cimex lectularius*, as well as the pest species  
74 *Diaphorina citri*, *Pachypsylla venusta* and *Halyomorpha halys*. However, among the 60 immune  
75 genes annotated in the genome of *Gerris buenoi*, we could identify a homolog of IMD, a unique  
76 feature amongst sequenced Hemiptera species only shared with recently sequenced true bug  
77 *Oncopeltus fasciatus* (Supplementary Figure 8) <sup>9</sup>. However, like in *Oncopeltus fasciatus*, the  
78 important IMD pathway components *dFADD* and *Kenny* seem to be missing in *Gerris buenoi*.  
79 Further research is required to elucidate how the IMD pathway functions in water striders and  
80 why IMD has been conserved in *Gerris* while it has been lost in other hemipterans.

81 Despite the lack of shared components between Toll and IMD, both pathways can regulate  
82 immune response through regulation of antimicrobial peptides (AMPs). Antimicrobial peptide  
83 (AMPs) families prevent the invasion of potential pathogens playing a fundamental role on innate  
84 immunity <sup>10</sup>. However, AMP families differ greatly among groups of insects <sup>11</sup> and only two  
85 defensin-like, one lysozyme and 6 of the Hemiptera-specific Serosins <sup>12</sup> could be identified. We  
86 failed to identify any attacins, hemiptericins or thaumatins in the *Gerris buenoi* genome. These  
87 results suggest that following Gerromorpha invasion of water environment they have been faced  
88 with a myriad of new potential pathogens, which may have accelerated Gerromorpha's AMPs  
89 divergence.

90 Finally, we could annotate an ortholog of the innate immune response gene gamma-interferon-  
91 inducible thiol reductase (*gilt*) in *Gerris buenoi* genome. Despite only innate immune response has  
92 been classically described in arthropods, recent studies on *Drosophila melanogaster* have shown  
93 that *gilt* ortholog gene has a role on adaptive immune response in flies <sup>1</sup>. However, the exact

94 mechanism of *gilt* function in immune response remains unknown. Moreover, in water striders  
95 including *Gerris buenoi*, although no immune role of *gilt* has been tested yet, knockdown analyses  
96 using RNA interference have shown an important new role in leg growth and adaptation <sup>13</sup>. These  
97 findings raise interesting questions about the functional divergence of arthropod immune system.

98

### 99 **Early Developmental Genes**

100 One of the main reasons for choosing to sequence the *Gerris buenoi* genome was due to its  
101 emerging status as a developmental model system <sup>14</sup>. Therefore, it was of particular interest to  
102 analyze its developmental gene content. In total 24 genes that are known, in other insects, to be  
103 involved in developmental processes were manually annotated (Supplementary Table 11). These  
104 include both genes encoding transcription factors and members of signaling pathways. These  
105 genes are identified and named as distinct development genes by the nomenclature from  
106 *Drosophila melanogaster* (Supplementary Table 12). *Gerris buenoi* has evidence of a canonical  
107 insect developmental pathway and can be expected to contain all components required to  
108 establish a normal anterior/posterior axis pattern. Compared to the later acting genes, the early  
109 developmental genes identified in *Gerris buenoi* show greater divergence from those found in  
110 *Drosophila melanogaster* and *Tribolium castaneum* (Supplementary Table 13), consistent with  
111 observations between *Drosophila* species <sup>15</sup>. Developmental genes previously identified in  
112 *Limnopus dissortis* (e.g. *decapentaplegic*) were also identified in the *Gerris buenoi* genome <sup>16</sup>  
113 confirming the presence of canonical insect developmental toolkit in this species. No duplication in  
114 the early development genes was observed. Early patterning genes appear conserved form what is  
115 known in other insects. As expected, there is no *bicoid* orthologue. Other genes known in  
116 *Drosophila* but not found in other insects, such as swallow are also not found in *Gerris*, such is the  
117 case of *caudal*. However, we suspect due to the identification of tailless that the absence of caudal

118 from the genome is due to incomplete coverage of the sequencing effort, rather than an actual  
119 absence of the gene in the genome. We identified gene models for the terminal patterning genes  
120 *torso*, and *torso-like* in *Gerris buenoi*. Although models homologous to PTH were identified they  
121 were not well supported. However, is it more than likely that *Gerris buenoi* possess a PTH  
122 orthologue given that PTH orthologues are found in other hemipterans. As with other Hemiptera,  
123 we could not find a model for *trunk*.

124

### 125 **Nuclear receptors and bHLH-PAS proteins**

126 We have annotated the genome of *Gerris buenoi* for all the genes of two families of ligand-  
127 dependent transcription factors: nuclear receptors and bHLH-PAS proteins. These regulators share  
128 many characteristics, such as response to small lipophilic ligands that can act either as signalling  
129 molecules or as xenobiotics and heterodimerisation factors with other members of their family.  
130 Numerous cross-talk interactions are known between nuclear receptors and bHLH-PAS proteins.  
131 All but one of the 21 nuclear receptor genes expected for an insect were found in the genome of  
132 *Gerris buenoi*. The missing gene E78 is also absent in *Pediculus humanus*<sup>17</sup> but is present in the  
133 genome of *Acyrtosiphon pisum*<sup>18,19</sup>. We found 3 NRO genes (knirps-related, eagle), as in *Pediculus*  
134 *humanus* and *Apis mellifera*<sup>20</sup>. Based on the work of<sup>21</sup>, we could also identify all the isoforms of  
135 ECR and NR2E6 genes.

136 The genome of *Gerris buenoi* contains at least 10 genes of the bHLH-PAS family. The gene *tango*  
137 (*tgo*) was not found, whereas it is present in the genome of the *Acyrtosiphon pisum*<sup>22</sup>. This  
138 absence is surprising, since *tgo* is the homolog of ARNT, which is the heterodimeric partner of  
139 several members of this family in mammals. Since the gene called «*germ cell-expressed*» (*gce*) in  
140 *Drosophila* is known to be a diptera specific duplication of *Methoprene-tolerant* (*Met*), its absence  
141 in the genome of *Gerris buenoi* was expected. The gene *single-minded* (*sim*) is duplicated, as in

142 *Tribolium castaneum*<sup>23</sup>.

143 In conclusion, we found a strong conservation of the number and identity of nuclear receptors and  
144 bHLH-PAS proteins with other insects.

145

#### 146 **Insulin/TOR signalling pathways**

147 The Insulin and TOR pathways function together as an integrated metabolic signalling pathway  
148 that is known to coordinate hormonal and nutritional signals in developing animals<sup>24-26</sup>. This  
149 facilitates the complex regulation of several fundamental molecular and cellular processes  
150 including transcription<sup>27,28</sup>, translation, cell stress, autophagy, and physiological states, including  
151 aging, starvation, hormonal regulation, as well as both organism-wide and tissue-specific growth  
152<sup>26-31</sup>. In insects, these pathways have been implicated in the developmental regulation of complex  
153 nutrient-dependent phenotypes ranging from beetle horns to the social castes of termites and  
154 bees<sup>32-34</sup>. For example, in beetles, the insulin receptor is known to be a critical regulator of  
155 appendage growth and it has been proposed that downstream transcription factors of the  
156 pathway (Foxo), can mediate organ-specific sizing and growth<sup>35,36</sup>. Taken together, the interplay  
157 between these two pathways may play an integral role in the growth and sizing of the different  
158 legs, and perhaps, even sexually dimorphic sized appendages found across the morphologically  
159 diverse array of water strider species. For this reason, we searched for and annotated various key  
160 players of this pathway. We found that *Gerris buenoi* possesses all components of this pathway  
161 including the *forkhead box protein O (foxo)*, *insulin receptor 1 (InR1)*, *insulin receptor 2 (InR2)*, the  
162 *insulin receptor substrate Chico*, the negative insulin pathway regulator *Phosphatase and Tensine*  
163 *homologue (Pten)*, *Rheb/Ras homolog enriched in brain (Rheb)*, the *S6 kinase (S6k)*, *Target of*  
164 *Rapamycin (Tor)*, the binding protein of the translation initiation factor eIF4E (*4E-BP/Thor*),  
165 *Tuberous sclerosis complex 1 and 2 (Tsc1 & Tsc2/gigas)*, the phosphoinositide-3-OH-kinase-

166 dependent serine/threonine protein kinase *Akt1/Pkb*, the amino acid transporter *Slimfast (slif)*  
167 and two Phosphoinositide 3-kinases (*Pi3K92E* & *Pi3K21B*). In addition to this, *Gerris buenoi*  
168 appears to have an additional, third, insulin receptor of unknown function and no known ortholog  
169 in insects. Therefore, the water strider *Gerris buenoi* possesses the entire Insulin/TOR toolkit,  
170 which would be a potential target for future research into nutrient-dependent differential body-  
171 plan growth and evolution in water striders.

172

### 173 **Wnt Signaling Pathway**

174 The Wnt pathway is a signal transduction pathway with fundamental regulatory roles in embryonic  
175 development in all metazoans. The emergence of several gene families of both Wnt ligands and  
176 Frizzled receptors allowed the evolution of complex combinatorial interactions with multiple  
177 layers of regulation <sup>37</sup>. Wnt signalling affects cell migration and segment polarity as well as  
178 segment patterning in most arthropods <sup>38</sup>. Surveying and comparing the gene repertoire of  
179 conserved gene families within and between taxonomic groups is the first step towards  
180 understanding their function during development and evolution.

181 Here we curated gene models for the main components of the Wnt signalling pathway and  
182 confirmed their orthology by phylogenetic analysis. We found 6 Wnt ligand subfamilies, three  
183 Frizzled transmembrane receptor subfamilies, the co-receptor *arrow*, and the downstream  
184 components *armadillo/beta-catenin*, *dishevelled*, *arrow*, *axin*, and *shaggy/GSK-3*. All of these  
185 genes were present in single copy in the assembly.

186 The *Gerris* Wnt ligand repertoire is comparable to other hemipterans and holometabolous insect  
187 species that have been analysed in detail. This supports observations of a reduction in the ligand  
188 repertoire in insects compared to an inferred ancestral complement of 17 subfamilies, with most  
189 extant Metazoan retaining ligands from 11-12 subfamilies. Nevertheless, assessments of gene

190 absence need to be done with caution when dealing with draft assemblies from second generation  
191 sequencing, which is the case for most recently published genomes.

192 A total of 18 models for the main Wnt signalling genes were curated in the *Gerris buenoi* assembly  
193 (Supplementary Table 14). The gene models generated by the MAKER pipeline were a very good  
194 start for the curation process in most cases, where most of the time only the 5' end of the models  
195 had to be edited by changing the translation start or adding upstream exons. The exceptions to  
196 this were the *dishevelled* isoforms where, despite very strong RNA-seq support for the complete  
197 model, only a small 5-exon model (for a gene with 16 exons in this species) for the middle part of  
198 the gene was present in the automated set. Despite curation, the models of three genes are  
199 incomplete. Similarly, *WntA* was missing the first exon in an upstream gap, and the *armadillo*  
200 model was missing the N-terminal region due to a gap directly upstream of the model. The third  
201 gene, *GSK-3 beta*, was split across two scaffolds despite strong RNA-seq support, with part 2 of  
202 this model filling the complete scaffold 10229 and yet still missing fragments at both ends.

203 All models were isolated on individual scaffolds, with the exception of *axin* and *arrow*.  
204 Interestingly, this linkage is not found in *Drosophila melanogaster*, *Tribolium castaneum*, or other  
205 i5k pilot project hemipteroid species surveyed to date. On the other hand, the absence of the  
206 ancient synteny of *wingless-Wnt6-Wnt10*<sup>39</sup>, which was wholly or partially confirmed in other i5k  
207 pilot hemipteroid species, is likely due to limitations in the current draft assembly. Regarding gene  
208 copy number, it is worth noting that *armadillo*, which encodes an intracellular transducer in the  
209 Wnt pathway, is represented by a single ortholog in the current assembly. As many insects,  
210 including other heteropterans, have two copies of *armadillo* (*Drosophila*, *Tribolium*, *Cimex*,  
211 *Oncopeltus*), it is surprising that there is no evidence for a second gene in *Gerris*.

212 We identified 6 *Wnt* gene subfamilies in the *Gerris* assembly, all with single copy genes:  
213 *wingless/Wnt1*, *Wnt5*, *Wnt7*, *Wnt8*, *Wnt10* and *WntA*. This is identical to the ligand subfamily



214 representation in *Oncopeltus fasciatus*, with the slight difference that there has been a duplication  
215 in *Oncopeltus Wnt8*<sup>9</sup>. There were also only six *Wnt* gene subfamilies found in the pea aphid  
216 (*Acyrtosiphon pisum*), although for a slightly different constellation of subfamilies:  
217 *wingless/Wnt1, Wnt5, Wnt 7, Wnt11, Wnt16* and *WntA*<sup>19</sup>. Together with earlier observations<sup>39</sup>,  
218 this report supports the idea that members of the Hemiptera have the fewest *Wnt* gene families  
219 reported in insects, with some of these losses perhaps having occurred relatively recently and  
220 independently in this clade.

221 Three models were curated for the *frizzled* (*fz*) transmembrane receptor families: *frizzled*, *frizzled-*  
222 *2*, and *frizzled-3*. These correspond to three of the four ancient *fz* families expected to have been  
223 present in the common ancestor of arthropods: *fz, fz2, fz3, fz4*<sup>40</sup>. The loss of *fz4* was also observed  
224 in *Oncopeltus fasciatus*<sup>9</sup> and *Acyrtosiphon pisum*<sup>19</sup>.

225

## 226 **Cysteine peptidases from the papain C1 family**

227 Cysteine peptidases from the papain C1 family (MEROPS classification<sup>41</sup>) are important lysosomal  
228 cathepsins, and participate as regulators and signaling molecules in a large number of biological  
229 processes<sup>42</sup>. In addition, cysteine cathepsins in a limited number of insect groups are important  
230 digestive enzymes evolved from lysosomal ancestors<sup>43,44</sup>. In Cucujiformia beetles, digestive  
231 cysteine cathepsins are an evolutionary response to a seed diet rich in serine peptidase inhibitors  
232<sup>43,45</sup>. In the case of true bugs, it is proposed that their sap-sucking ancestors lost digestive serine  
233 peptidases in adapting to plant sap, and the adaptation of cysteine cathepsins for digestive  
234 functions is a consequence of a return to a protein diet<sup>46</sup>. A detailed study of cysteine cathepsins  
235 in the beetles *Tenebrio molitor* and *Tribolium castaneum* (Coleoptera: Tenebrionidae) revealed  
236 expansions of genes encoding cysteine digestive cathepsins<sup>47,48</sup>. Cysteine cathepsins in *T.*  
237 *castaneum* larvae are important components of adaptive responses in overcoming the effect of

238 dietary protease inhibitors <sup>49</sup>.

239 There are few publications of cysteine peptidases in Heteroptera. Most of the early publications  
240 suggested that cysteine peptidases are the major digestive peptidases in several families of this  
241 insect order (see <sup>43,44</sup>), such as *Reduviidae*, where digestive cathepsins L and B were identified in  
242 two *Triatoma* species <sup>50,51</sup>. Sequencing the *Rhodnius prolixus* gut transcriptome revealed 11  
243 cysteine peptidases expressed in the gut <sup>52</sup>. We are unaware of any publications on digestive  
244 peptidases of the bugs from the family Gerridae, and the specific biology of this semi-aquatic  
245 insect can impact the set of digestive enzymes.

246 In *Gerris buenoi*, we found 28 genes and gene fragments that encode cysteine cathepsins of the C1  
247 family. These enzymes primarily belong to the cathepsin L-like subfamily <sup>53</sup>, while the cathepsin B-  
248 like subfamily was represented by only three potentially active enzymes and one putatively  
249 catalytically inactive TINAL-like protein <sup>54</sup>. Members of the cathepsin L-like family included two  
250 types of peptidase genes: (i) those encoding conserved cathepsins, which include orthologs of  
251 mammalian cathepsin L and cathepsin F, and orthologs of cathepsin I and cathepsin LI (26-29kD-  
252 proteinase) that are found in most insects (manuscript in preparation); (ii) 13 species-specific  
253 cathepsin L-like genes that do not have orthologs in other insects and are unique to *Gerris buenoi*,  
254 The cathepsin B-like family contained an ortholog of mammalian cathepsin B and two species-  
255 specific cathepsin B-like peptidase genes.

256 Conserved cathepsins of *Gerris buenoi* have a unique profile: there are eight cathepsin LI genes,  
257 while in most species only one copy of the gene is found. Functional analysis of cathepsin LI is  
258 premature, but previous studies suggested that those peptidases (26-29kD-proteinases) could play  
259 a role in immune defense system degrading foreign proteins <sup>55</sup> or participate in metamorphosis <sup>48</sup>.

260 Species-specific cysteine peptidases include 15 different genes, 11 of which form two phylogenetic  
261 clades presumably derived from an original cathepsin L through the course of evolution, and

262 localized as sequential clusters of 2 to 4 genes. Considering all Heteroptera species described thus  
263 far have digestive cysteine peptidases <sup>50-52</sup>, we propose that they also may play a digestive role in  
264 *Gerris buenoi*. This hypothesis is supported by the fact that similar species-specific clades of  
265 cysteine peptidases in the more thoroughly studied coleopterans *Tribolium castaneum* <sup>47,48</sup>,  
266 *Tenebrio molitor* <sup>47</sup> and *Leptinotarsa decemlineata* <sup>56</sup> are linked to digestion of food.

267

### 268 **Visual genes**

269 Water striders have drawn exceptional interest by visual scientists due to their exceptional visual  
270 ecology and correspondingly specialized organization of the visual system. The prominent, over  
271 900 ommatidia counting compound eyes of water striders are involved in prey localization, mating  
272 partner pursuit, and predator evasion <sup>57-59</sup>. Although water striders utilize vision for dispersal by  
273 flight, water strider vision is considered specifically adapted to maximally sensitive 2-dimensional  
274 perception, i.e. the horizontal horizon of their water surface environment. Main evidence for this  
275 is the lateral acute zone, which facilitates neural superposition vision <sup>60,61</sup>. Similar to higher Diptera  
276 like *Drosophila*, each ommatidial input is optically insulated from neighboring ommatidia through  
277 apposition optics. The sensitivity of target neurons in the lamina, however, is heightened at the  
278 level or neural organization of photoreceptor axons in target locations of the optic neuropils  
279 defined as neural superposition <sup>57</sup>. A likely functional morphological corollary of this is the open  
280 organization of the rhabdom in water strider ommatidia: Most of the individual photoresponsive  
281 membrane compartments (rhabdomeres) of each of the 8 photoreceptors per ommatidium are  
282 physically separated from each other <sup>62</sup>. This trait is shared derived trait for Heteroptera in  
283 contrast to Auchenorrhyncha and Coleorrhyncha <sup>63</sup>, which feature a closed rhabdom where all  
284 rhabdomeres are in contact with each other along the proximodistal axis of the ommatidium. Each

285 water strider ommatidium contains 6 outer and 2 inner photoreceptors. Recent work has  
286 produced evidence of at least 2 types of ommatidia with either green (~530nm) or blue (~470-  
287 490nm) sensitive outer photoreceptors <sup>64</sup>, but the wavelength specificity of the two inner  
288 photoreceptors cells is still unknown.

289 Further notable for water strider vision is the dimorphism of ventral and dorsal ommatidia at the  
290 level of inner photoreceptor organization <sup>63</sup>. In the both dorsal and lateral ommatidia, both of the  
291 two inner photoreceptors contribute rhabdomeres in a highly organized orientation related to the  
292 rhabdomeres of the outer photoreceptors. In ventral ommatidia, by contrast, only the inner  
293 photoreceptor R8 forms a rhabdomere while the inner photoreceptor R7 does not. Interestingly,  
294 the specific orientation of the ventral R8 rhabdomeres is variable across Gerromorpha species. The  
295 tandem position of the R7 and R8 rhabdomeres in dorsal ommatidia has been proposed to be  
296 shared derived for Gerromorpha <sup>63</sup>.

297 Typical for aquatic insects <sup>65</sup>, *Gerris* is also polarized light-sensitive <sup>66</sup>. Schneider and Langer <sup>62</sup>  
298 describe how the cellular structure of photoreceptors relates to different polarized light  
299 sensitivities in the dorsal and ventral eyes. Studying the spectral sensitivity of *Gerris*  
300 photoreceptors to polarized light <sup>64</sup> concluded that the peripheral photoreceptors are either green  
301 or blue sensitive while the inner photoreceptors sensitivity remains unknown. On the other hand,  
302 Bartsch <sup>67</sup> recorded 37 photoreceptor cells, only 7 of which were blue sensitive while the rest were  
303 green sensitive. This study further revealed the existence of green and blue sensitive polarized  
304 light detecting subsystems in the lateral-equatorial and lateral-dorsal region of the eye. The green-  
305 sensitive subsystem has been proposed to mediate object detection while the function of the blue  
306 sensitive system has remained enigmatic.

307 Our genomic analysis of *G. buenoi* uncovered 8 opsin homologs (5 retinal and 3 non-retinal). The  
308 five retinal opsins (Figure 4A and Supplementary Figure 2) were sorted into one member of the

309 UV-sensitive opsin subfamily and 4 tightly tandem clustered members of the long wavelength  
310 sensitive (LWS) opsin subfamily (Figure 4A). The three extra-retinal opsins detected in the *Gerris*  
311 genome include: the deeply conserved yet functionally still poorly understood Rh7 opsin subfamily  
312 <sup>68,69</sup>, Arthropsin <sup>70-72</sup>, and c-opsin (Supplementary Figure 2 and Supplementary Table 5). Only  
313 partial sequences Arthropsin and c-opsin were detectable in the *Gerris buenoi* genome assembly.  
314 However, complete transcript sequences were found in the transcriptome of the closely related  
315 water strider species *Limnoporus dissortis* (Supplementary Figure 2).

316 Surprisingly, both genomic and transcriptome search in *G. buenoi* and other water strider species  
317 failed to detect sequence evidence of homologs of the otherwise deeply conserved blue-sensitive  
318 opsin subfamily (**¡Error! No se encuentra el origen de la referencia.B**; Supplementary Table 5) <sup>73</sup>.

319 Although the apparent lack of blue opsin in *G. buenoi* was unexpected given the presence of blue  
320 sensitive photoreceptors <sup>64</sup>, it was consistent with the lack of blue opsin sequence evidence in  
321 available genomes and transcriptomes of other heteropteran species including *Halyomorpha*  
322 *halys*, *Oncopeltus fasciatus*, *Cimex lectularius*, *Rhodnius prolixus*. Blue opsin, however, is present in  
323 other hemipteran clades, including Cicadomorpha (*Nephotettix cincticeps*) and Sternorrhyncha  
324 (*Pachypsylla venusta*) (**¡Error! No se encuentra el origen de la referencia.B**). Taken together, these  
325 data lead to the conclusion that the blue-sensitive opsin subfamily was lost early in the last  
326 common ancestor of the Heteroptera (Figure 4B and Supplementary Table 5). This raised the  
327 question of which compensatory events explain the presence of blue sensitive photoreceptors in  
328 water striders.

329 Studies in butterflies and beetles produced evidence of blue sensitivity shifts in both UV- and LWS-  
330 opsin homologs following gene duplication <sup>74-76</sup>. Given that the UV SWS-opsin family is generally  
331 conserved throughout insects even in crepuscular species like kissing bugs and bed bugs  
332 (Supplementary Figure 2), and that evidence of UV-sensitive photoreceptors has been reported for

333 backswimmers <sup>77</sup>, it seems reasonable to hypothesize that one or more of the newly expanded *G.*  
334 *buanoi* LWS opsin genes represent blue-shifted paralogs. In further support of this hypothesis, the  
335 4 *G. buanoi* LWS opsin paralogs have accumulated substantial sequence divergence amounting to  
336 pairwise 40 to 80 amino acid differences despite their tight genomic linkage, raising the possibility  
337 of wavelength-sensitivity change through adaptive tuning substitutions. In butterflies, molecular  
338 evolutionary studies have implicated amino acid residue differences at four protein sequence sites  
339 in sensitivity shifts from green to blue: Ile17Met, Ala64Ser, Asn70Ser, and Ser137Ala <sup>74,75</sup> (**¡Error!**  
340 **No se encuentra el origen de la referencia.C**, Supplementary Figure 2 and Supplementary Data).  
341 We took two approaches to probe for the generality of the correlation of these protein sequence  
342 site states with wavelength specificity. First, we consulted sequence site information from  
343 physiologically characterized LWS opsins in other insect orders. This included the green-sensitive  
344 honeybee LWS opsin 1 ( $\lambda_{\max}$  544nm) and its blue-shifted homolog LWS opsin 2 ( $\lambda_{\max}$  490nm) <sup>78</sup>, the  
345 green-sensitive *Drosophila* LWS opsin Rh6 ( $\lambda_{\max}$  515nm) and its blue-shifted paralogs Rh1 ( $\lambda_{\max}$   
346 480nm) and Rh2 ( $\lambda_{\max}$  420nm), and the two green-sensitive LWS opsin paralogs of the cricket  
347 *Gryllus bimaculatus* ( $\lambda_{\max}$  515nm and  $\lambda_{\max}$  511nm) <sup>63</sup> (**¡Error! No se encuentra el origen de la**  
348 **referencia.B**). In parallel, we assessed the degree of amino acid residue conservation at these sites  
349 in a sample of 114 LWS opsin homologs from 54 species representing 12 insect orders  
350 (Supplementary Data File 1). Based on these criteria, sites 64 and 137 emerged as only ambiguous  
351 indicators of green vs blue sensitivity due high overall amino acid state variation in the 114  
352 sampled opsin sequences and inconsistent representation of blue and green sensitivity states in  
353 the physiologically characterized opsin sequences of *Drosophila*, cricket, and the honeybee. Tuning  
354 sites 17 and 70, however, appear to be high confidence indicators of green vs blue-shifted LWS  
355 homologs. At site 17, the green-sensitive isoleucine state is found in the green-sensitive LWS-  
356 opsins of *Drosophila*, honeybee, and the cricket, while the blue-sensitive methionine state is

357 shared with the blue-shifted opsin homologs of both *Drosophila* (Rh1) and the honeybee (LWS2)  
358 (**¡Error! No se encuentra el origen de la referencia.**B). Further, the likely ancestral green-sensitive  
359 isoleucine state is present in over 70% of the surveyed 114 insect LWS opsins. Equally significant,  
360 the blue-sensitive methionine is the second most frequent state due to its conservation in  
361 dipteran orthologs of the blue-shifted *Drosophila* Rh1 (5) or hymenopteran orthologs of honeybee  
362 LWS opsin 2 (10). Thus, based on amino acid site 17, *G. buenoi* LWS opsin 2 and 4 represent green-  
363 sensitive paralogs while *G. buenoi* LWS opsin 1 and 3 represent likely blue-shifted LWS opsins.  
364 Although less resolved, a similar picture emerges for site 70 where *G. buenoi* LWS opsin 3 stands  
365 out as a rare example of sharing a serine residue with blue-shifted butterfly LWS opsins. The  
366 putatively green-sensitive asparagine state, by contrast, is much more conserved, accounting for  
367 over 90% of the 114 insect LWS opsins surveyed, including even both blue-shifted *Drosophila* LWS  
368 opsins. Intriguingly, a cysteine is found at this site in the blue-shifted honeybee LWS opsin 2  
369 homolog, which resembles serine as sulfur/selenium-containing amino acid residue (**¡Error! No se**  
370 **encuentra el origen de la referencia.**B). The extreme rarity of the blue-sensitivity associated  
371 serine state at position 70 thus further supports *G. buenoi* LWS opsin 3 as blue-shifted together  
372 with the blue-shift indicative methionine at position 17.

373 Taken together, the comparative evidence identifies Gbue LWS opsin 3 as a candidate of blue-  
374 shifted paralog with the highest confidence followed by Gbue LWS opsin 1 and 2. This conclusion  
375 is further backed by the fact that water striders lack ocelli, which implies that all four paralogs are  
376 most likely expressed in photoreceptors of the compound eye. Overall, it thus seems most likely  
377 that the differential expression of the highly sequence-diverged Gbue LWS opsin paralogs  
378 accounts for the presence of both blue- and green-sensitive photoreceptors in water striders.  
379 Moreover, given that the outer blue photoreceptors have been specifically implicated in the  
380 detection of contrast differences in water striders <sup>64</sup>, it is tempting to speculate that the

381 deployment of blue-shifted LWS opsins represents another parallel to the fast-tracking visual  
382 system of higher Diptera. While these predictions await physiological verification in water striders,  
383 the genomic exploration of *Gerris buenoi* vision identifies water striders and Heteroptera as a  
384 whole as an exceptionally relevant group in the molecular study of adaptive visual system  
385 evolution for comparison to Lepidoptera, Hymenoptera, and the higher Diptera (Brachycera).

386

### 387 **Chemoreceptor gene families**

388 The three chemoreceptor families addressed herein are the seven-transmembrane-domain  
389 Odorant and Gustatory Receptors that together comprise the insect chemoreceptor superfamily,  
390 and the unrelated three-transmembrane-domain Ionotropic Receptors <sup>79,80</sup>. All three families have  
391 recently been fully documented from three other heteropterans with genome sequence used as  
392 comparators here, the kissing bug *Rhodnius prolixus* <sup>81</sup>, the bedbug *Cimex lectularius* <sup>82</sup>, and the  
393 milkweed bug *Oncopeltus fasciatus* <sup>9</sup>. More distant comparisons with other hemipteroid insects  
394 like the pea aphid *Acyrtosiphon pisum* <sup>83</sup> and the human body louse *Pediculus humanus* <sup>17</sup> are not  
395 included here as these chemoreceptors are mostly highly divergent from these four species, and  
396 comparisons including all five above species are available in Panfilio et al. <sup>9</sup>.

397 The Odorant Receptors (ORs) is a large family, which, at least in several endopterygotes, have  
398 been shown to mediate most of insect olfaction (e.g. <sup>80</sup>). The OR family evolved within basal  
399 insects <sup>84,85</sup> and consists of the single highly conserved Odorant receptor Co-receptor protein and a  
400 set of “specific” ORs, each of which is co-expressed with OrCo, generally one specific OR per  
401 olfactory sensory neuron type. The OR family in *Gerris* consists of at least 153 genes, two of which  
402 are modelled as being alternatively spliced in a fashion found in many other insects, with two long  
403 first exons encoding most of the protein that are alternatively spliced into several short-shared  
404 exons encoding the C-terminus. Thirteen of these OR genes are pseudogenic in the genome



405 assembly, so the total of seemingly intact ORs in this compilation is 146, however many are partial  
406 models and many gene fragments remain. Phylogenetic analysis along with the other three  
407 heteropterans reveals the usual high conservation of the single OrCo proteins (Supplementary Figure  
408 5A). There are three possible simple orthologs of “specific” ORs across these four heteropterans,  
409 indicated with an asterisk in Supplementary Figure 5A, and two more with simple duplications in one  
410 or more species (two asterisks). Otherwise the relationships consist either of highly divergent  
411 genes, or large expansions or “blooms” of ORs within a particular heteropteran lineage. In the case  
412 of *Gerris* these include expansions of 4 (Or64-67), 8 (Or145-152), 9 (Or90-97a/b), 13 (Or72-84), 13  
413 (Or98-110), 16 (Or111-125), 18 (Or44-61), and 44 proteins (Or1-43). Comparable expansions were  
414 previously described in *Rhodnius* and *Oncopeltus* and are clear in this analysis as well (Supplementary  
415 Figure 5A). In contrast, *Cimex* has almost no lineage-specific expansions, with OR clades consisting  
416 of only 1, 2, or 3 genes.

417 The Gustatory Receptors (GRs) is also a large family and consist of subfamilies and lineages that  
418 predate even the origins of the OR family <sup>79,85-87</sup>. The most prominent of these are the sugar,  
419 carbon dioxide, and fructose receptor subfamilies (Supplementary Figure 5B). The sugar receptors,  
420 represented here by Gr1/2 from *Apis mellifera*, were lost from the obligate blood feeders *Cimex*  
421 and *Rhodnius*, but are present as three genes each in *Oncopeltus* and this more general predator  
422 (Gr7-9). The carbon dioxide receptor subfamily, represented here by the Gr21a/62a dimer in *D.*  
423 *melanogaster* and Gr1-3 in *Tribolium castaneum*, was lost from most Hymenoptera as well as  
424 *Rhodnius*, but multiple related GRs are present in *Cimex*, *Oncopeltus*, and *Gerris* (Gr1-6). It remains  
425 to be shown whether these more distant relatives of the carbon dioxide receptors of  
426 endopterygotes are involved in perception of this molecule in heteropterans. The fructose  
427 receptor implicated also in brain nutrient sensing <sup>88</sup> has a single representative in each  
428 heteropteran, although the *Gerris* gene is represented only by a fragment in the current genome

429 assembly (Gr10). This is the only GR lineage that is a simple ortholog across these four  
430 heteropterans. The remaining GRs present a pattern similar to that of most of the ORs, that is, a  
431 few highly divergent lineages, and several highly expanded lineages. In these GRs, however, these  
432 expansions mostly involve large alternatively-spliced loci, comparable to those found in many  
433 other insects from *D. melanogaster*<sup>87</sup> to *Calopteryx splendens*<sup>84</sup>. These loci consist of several long  
434 first exons encoding most of the receptor (transmembrane domains 1-6) that are modelled as  
435 being alternatively spliced into three short shared exons encoding the intracellular loop 3 and  
436 TM7. The three largest of these loci, Gr35, 48, and 32 encode 11, 11, and 13 different and  
437 sometimes quite divergent receptors, respectively (Supplementary Figure 5B). The largest of these GR  
438 expansions consists of 80 proteins encoded by 27 genes (Gr22-48), while three smaller expansions  
439 of 10, 12, and 14 proteins also involve alternatively-spliced loci (Gr45-47, 55-60, and 15-19,  
440 respectively). This pattern of expansion of the “bitter” GRs in alternatively-spliced loci is shared  
441 with *Oncopeltus* where it has resulted in an even larger repertoire of “bitter” GRs, but barely at all  
442 in *Rhodnius* and *Cimex* both of which have comparatively small “bitter” GR subfamilies,  
443 presumably reflecting the different chemical ecologies of these four heteropterans.

444 The Ionotropic Receptors (IRs) is a variant family of the large and ancient superfamily of ionotropic  
445 glutamate receptors<sup>79,89</sup>. The family contains two highly conserved co-receptors that are very  
446 similar to the ionotropic glutamate receptors in sequence and structure, Ir8a and 25a  
447 (Supplementary Figure 5C), as well as another widely expressed gene that might also encode a co-  
448 receptor, Ir76b, specifically involved in perception of amino acids<sup>90,91</sup>. These heteropterans have  
449 four more single-copy IRs (21a, 40a, 68a, and 93a), most of which are implicated in perception of a  
450 variety of stimuli from temperature to humidity<sup>92,93</sup>. All of these are present as single-copy clear  
451 orthologs of the named *Drosophila* genes, and indeed most are older gene lineages than  
452 heteropterans<sup>84</sup>. An unusual exception is that there is a divergent duplicate of Ir8a (Ir8a2L)

453 immediately upstream of and in tandem with Ir8a. This gene is missing the first 1/3 of the  
454 equivalent length of Ir8a, and there is no RNAseq support for it, unlike Ir8a and 25a, so it might not  
455 be functional. As is commonly the case in other insects, there is a small expansion to four genes of  
456 the lineage related to the Ir41a/76a/92a lineage in *D. melanogaster*, which for consistency with  
457 other genomes are named in an Ir41 series (Ir41d is not shown in Supplementary Figure 5C because it  
458 is a partial model that does not align well). In *Drosophila* Ir41a and 92a have been implicated in  
459 detection of amines<sup>94,95</sup>. A far larger expansion of 24 genes is related to the Ir75a-d/64a/84a  
460 lineage in *D. melanogaster*, and again this lineage is also expanded in many other insects, although  
461 seldom to this extent. Ir75a/b, 64a, and 84a in *Drosophila* flies have been shown to be involved in  
462 perception of several acids<sup>96-100</sup>. Like the other heteropterans and many other insects, there are  
463 several highly divergent IRs, falling into two groups with no simple relationships to *D.*  
464 *melanogaster* IRs. These were therefore named in a series from Ir101 to avoid confusion with *D.*  
465 *melanogaster* Ir genes, whose names only go to Ir100a because like the Or and Gr genes they were  
466 named for their cytological location in the polytene chromosomes. Ir101-105 are weakly related to  
467 a large expansion of so-called “divergent” IRs in *Drosophila*, including the Ir20a clade that function  
468 as gustatory receptors<sup>101,102</sup>. Ir106-109 form a small clade related only to some other divergent  
469 heteropteran IRs, and are perhaps also involved in gustation. Thus, while not nearly as large as the  
470 OR and GR families, these IRs probably contribute some well-conserved functions shared with  
471 their orthologs with *Drosophila*, as well as perception of amines and diverse acids, and contribute  
472 to gustation. The only lineage-specific expansion compared with the other heteropterans is the  
473 IR75 clade implicated in perception of various acids, but it is unclear how this relates to the  
474 chemical ecology of water striders.

475

## 476 **Detoxification pathways**

### 477 Cytochrome P450

478 Insect cytochrome P450 (CYP) proteins play a role in metabolic detoxification of xenobiotics  
479 including insecticides <sup>103,104</sup>. They are also known to be responsible for the synthesis and  
480 degradation of endogenous molecules, such as ecdysteroids <sup>105</sup> and juvenile hormone <sup>106</sup>. The  
481 insect CYPs comprise of one of the oldest and largest gene families in insect, of which great  
482 diversity has been resulted from consecutive gene duplications and the subsequent diversification  
483 to extend the organism's adaptive range <sup>107</sup>.

484 A total of 103 CYP genes (Supplementary Table 9 and Supplementary Data File 2) were annotated  
485 and analyzed in the *G. buenoi* genome. Ten more CYP fragments were found, but they were not  
486 included in this analysis due to their short lengths (<250 aa). This is the largest number of CYP  
487 genes among the hemipteran species of which CYPomes were genome-widely annotated:  
488 *Rhodnius prolixus* (88 CYPs) and *Nilaparvata lugens* (68 CYPs) <sup>108,109</sup>. It is also higher than that of  
489 the fruitfly, the honeybee, and the silkworm (Supplementary Table 9). They fall into one of the  
490 four distinct groups of CYP gene family, named the Clan 2, Clan mito, Clan 3 and Clan 4, where 6  
491 genes 62 genes 25 genes, and 10 genes are present, respectively.

492 Among the *G. buenoi* CYPs, the Clan 2 show high level of one to one orthology with other insects.  
493 The Gerris Clan 2 (6 genes) contains one gene of each CYP15, CYP303, CYP306, and CYP307, and  
494 two genes of CYP305 (Figure 5A). The duplicated CYP305s (CYP305A1 and CYP305A2) seems to be  
495 unusual compared to other insects, where a single CYP305A1 gene is present. In fact, these two  
496 genes are found in one scaffold (Scaffold443) of the *G. buenoi* genome in tandem suggesting a  
497 recent duplication. On the other hand, no orthologues of CYP18 and CYP304 were detected  
498 neither in transcriptome nor in genome sequences of *G. buenoi*. The mitochondrial Clan is also  
499 known to be highly conserved. Although the *G. buenoi* mitochondrial Clan (10 genes) does show

500 such a one-to-one orthology only for CYP301A1, CYP302A1 and CYP404B1, an expanded cluster of  
501 CYP302Bs (7 genes) comprises a unique lineage in *G. buenoi* (Figure 5B). The other orthologues  
502 found in the other hemipteran mitochondrial Clan, such as CYP301B1, CYP314A1, CYP315A1,  
503 CYP353D1, CYP419A1, and CYP394B1 were not detected in *G. buenoi*. The Clan 3 is the largest clan  
504 showing the highest degree of gene expansion in insect CYP gene family. In the *G. buenoi* Clan 3  
505 (62 genes), many genes might have undergone lineage-specific gene duplications, resulting in  
506 seven gene clusters (Figure 5C). In particular, CYP3096 is composed of 14 genes (including -A, -B, -  
507 C, and -D subfamilies), CYP3095A is of 10 genes, CYP6HL is of 8 genes, CYP3097A is of 7 genes,  
508 CYP6HK of 6 genes, CYP3091A is of 4 genes, CYP3092A is of 3 genes, CYP3085A is of 2 genes,  
509 CYP3086A is of 2 genes. There are four single-gene families, which are CYP3089A, CYP3090A,  
510 CYP3101A, CYP3102A, and CYP3103A. Interestingly, CYP9-like genes most likely found in *T.*  
511 *castaneum* and *B. mori* were not detected in the *G. buenoi* genome (Figure 5C). The *G. buenoi* Clan  
512 4 contains 25 genes mostly belonging to CYP4 subfamilies and to the new family CYP3093. The *G.*  
513 *buenoi* CYP3093 forms a 10 duplicated gene cluster, suggesting a large gene expansion as shown in  
514 the *R. prolixus* CYP3093s (Figure 5D). There are two more gene clusters, CYP4EN (7 genes) and  
515 CYP4EM (5 genes), which seem to be homologous to the *R. prolixus* CYP4EMs. Finally, we found six  
516 intronless CYP genes, CYP306A1, CYP301A1, CYP6HL7, CYP4EM3, CYP4EM4, and CYP4EM5, which  
517 consist of a single exon in their genomic position. They might have been derived from an initially  
518 retrotransposed gene, because, for example, the orthologues of CYP306A1 in other insects have  
519 introns.

520 Overall, genome-wide analysis was performed to assemble and annotate the *G. buenoi* CYP gene  
521 family resulting in 103 genes. Phylogenetic analysis revealed not only their conserved orthology in  
522 insect, but also their lineage-specific gene expansions, suggesting the CYPs might have provided  
523 the water strider to adapt to the challenge in its unique environment. As the *G. buenoi* CYPs have

524 not been highlighted so far, there will be many other interesting aspects to be explored in this  
525 multifunctional enzyme family.

526

### 527 UDP-glycosyltransferases

528 UDP-glycosyltransferases (UGTs) catalyze the conjugation of a range of diverse small hydrophobic  
529 compounds with sugars to produce water-soluble glycosides, playing an important role in the  
530 detoxification of xenobiotics and in the regulation of endobiotics. Insect UGT enzyme activity has  
531 been investigated in several species including the housefly *Musca domestica*<sup>110</sup>, the fruitfly  
532 *Drosophila melanogaster*<sup>111</sup>, the tobacco hornworm *Manduca sexta*<sup>112</sup>, the silkworm *Bombyx*  
533 *mori*<sup>113</sup>, and other insects<sup>114</sup>, revealing that they play an important role in the detoxification and  
534 sequestration of a variety of plant allelochemicals and insecticides<sup>115-119</sup>. Enzyme activities of the  
535 insect UGTs are detected mostly in the fat body, midgut and other tissues<sup>114</sup>, but also expressed in  
536 the antenna of *D. melanogaster*<sup>120,121</sup> and *Spodoptera littoralis*<sup>122</sup>. In addition, many endogenous  
537 compounds, like ecdysteroid hormones<sup>123</sup> and cuticle tanning precursors<sup>124,125</sup> are glycosylated  
538 by UGT enzymes. Furthermore, dietary flavonoids have been shown to be sequestered as glucose  
539 conjugates to impart color to the wings in a lycaenid butterfly<sup>126</sup> or in *B. mori* to be glycosylated to  
540 produce a green color in the cocoon with UV-shielding properties<sup>116</sup>. A UGT enzyme was recently  
541 shown to catalyze the final step in synthesis of cyanogenic glucosides by the Burnet moth *Zygaena*  
542 *filipendulae*<sup>127</sup>. These findings suggest multiple roles of the insect UGT enzymes in detoxification,  
543 olfaction, endobiotic modulation, and sequestration. Although a comprehensive genomic analysis  
544 of diverse insect UGTs was previously reported<sup>128</sup>, hemipteran UGTs used in the analysis back  
545 then were only from an aphid species, *Acyrtosiphon pisum*. Together with other hemipteran  
546 genomes recently sequenced, the water strider (*Gerris buenoi*) genome could shed lights on the  
547 molecular evolution of this multigene family particularly in Hemiptera as well as generally in

548 insects.

549 *Gerris buenoi* genome contains 28 putative UGT genes including several partial sequences due to  
550 genomic gaps (Supplementary Table 10). There are fewer UGT genes in the water strider than in  
551 the pea aphid, *Acyrtosiphon pisum* (58 UGTs), but higher than in the bed bug, *Cimex lectularius* (7  
552 UGTs). This is similar number found in the mosquito, *Anopheles gambiae* (26 UGTs). One  
553 interesting genomic feature of *G. buenoi* UGT repertoire is that such a large number of genes have  
554 been multiplied by tandem-gene duplication. In Scaffold1549, ten UGT genes are arrayed in a row,  
555 suggesting gene duplication events might produce such a large gene cluster (Supplementary Figure  
556 6). In addition, multiple genes lie in Scaffold1323, Scaffold3228, and Scaffold2126 with 4, 3, and 2  
557 UGT genes, respectively. A consensus Maximum-likelihood tree (Supplementary Figure 7)  
558 constructed with conserved C-terminal half of the deduced amino acid sequences from *G. buenoi*  
559 UGTs supports the clustered genes placed in the same genomic location are produced by gene  
560 duplication, suggesting such a tandem diversification of genes might lead to broaden the enzyme  
561 substrate range. Although any of the UGT genes have not been functionally characterized in the  
562 water strider yet, genomic analysis could give an insight on further studies on this interesting  
563 multigene family.

564

### 565 **Wing development and polyphenism**

566 The ability to produce different phenotypes from a single genome in response to environmental  
567 cues is called 'polyphenism' <sup>129</sup>. Water striders express a seasonal wing polyphenism (Figure 1),  
568 where adults are short-winged in the early summer generation when habitats are stable, but are  
569 long-winged in the mid-summer generation when habitats become unstable <sup>130,131</sup>. It is thought  
570 that this wing polyphenism reflects an adaptive tradeoff between wing length and reproduction,

571 where in unstable habitats populations invest in long wings and produce fewer offspring, but in  
572 stable habitats populations produce short wings and invest in more offspring<sup>130,131</sup>. The  
573 environmental cues that may affect wing morphology include photoperiod, temperature, resource  
574 availability, and population density<sup>131-133</sup>.

575 Wing polyphenism and adaptive tradeoffs between flight and reproduction are ecologically  
576 important and phylogenetically widespread among insects. In wing polyphenic ants and aphids, for  
577 example, previous studies used bioinformatics approaches to infer that the genes involved in the  
578 development of wings and the ovaries have a different DNA methylation signature relative to the  
579 rest of the genome<sup>134-138</sup>. This suggests that these genes are regulated by epigenetic mechanisms  
580<sup>134-138</sup>. Therefore, in the water strider *Gerris buenoi*, we predicted that genes involved in wing  
581 patterning and reproduction will also have a different DNA methylation signature relative to the  
582 rest of the genomes. Furthermore, previous studies have shown that juvenile hormone (JH) and  
583 insulin signaling pathways are associated with regulation of reproduction and wing polyphenism in  
584 insects<sup>129,139-141</sup>. We therefore analyzed epigenetic signatures in genes involved in both of these  
585 pathways relative to the rest of the genome. Finally, we compared genes from *Gerris buenoi* to  
586 orthologues in *Rhodnius proxilus* because this closely related species serves as a phylogenetically  
587 controlled outgroup, which has not evolved wing polyphenism.

588 We discovered that the mean CpG<sub>O/E</sub> values for *Gerris buenoi* genes in the network related to wing  
589 polyphenism, juvenile hormone, insulin signalling and reproduction are not significantly different  
590 from the mean of the resampled distribution of CpG<sub>O/E</sub> of all *Gerris buenoi* genes (Supplementary  
591 Figure 9 and Supplementary Table 15). The mean CpG<sub>O/E</sub> of the *R. proxilus* orthologues related to  
592 wing polyphenism, juvenile hormone regulation, insulin signalling and reproduction is also not  
593 significantly different from the mean of the resampled distribution of CpG<sub>O/E</sub> of all  
594 *Rhodnius proxilus* (Supplementary Figure 9). These results indicate that genes in the network



595 related to wing polyphenism, juvenile hormone, insulin signalling and reproduction do not have a  
596 distinct methylation signature relative to the rest of genes in *Gerris buenoi* and *Rhodnius proxilus*  
597 genomes.

598 The sequencing of three ant genomes, each of which possess a dramatic wing and reproductive  
599 polyphenism, showed significant methylation signature of genes known to be involved in wing and  
600 reproductive development relative to the rest of the genes in the ant genomes<sup>134-136</sup>. We  
601 therefore expected that genes involved in wing and reproductive development in the wing  
602 polyphenic water strider *Gerris buenoi* would possess a similar methylation signature as in the  
603 ants. To our surprise, the results of our analysis reveal that methylation signatures in genes  
604 involved in wing and reproductive development are not significant relative to the rest of the  
605 genome. This is also the case for the closely-related and non-wing polyphenic insect *Rhodnius*  
606 *proxilus*. These findings suggest that more classical mechanisms for achieving differential gene  
607 expression underlying polyphenism, such as endocrine-based mechanisms like hormone secretion  
608 and neuropeptide release, are involved in regulating the expression of genes underlying wing  
609 polyphenism as well as the trade-off between wing development and reproduction in water  
610 striders<sup>142</sup>. Altogether, these results open up exciting future research possibilities for  
611 understanding how wing polyphenism is regulated in water striders, and why they appear to differ  
612 from other polyphenic insects.

613

#### 614 **DNA methyltransferases**

615 DNA methylation is an epigenetic mechanism known to be involved in the regulation of alternative  
616 splicing and gene expression in insects<sup>143-145</sup>. In honeybees, it has been demonstrated that the  
617 DNA methyltransferase, DNMT3, is critical in sizing, morphology and reproductive organ  
618 development associated with caste determination as well as alternative splicing regulation<sup>144-146</sup>.

619 Furthermore, differential DNA methylation is associated with flexible behavioral castes (nurses  
620 and foragers) in bees <sup>147</sup>. Therefore, this epigenetic mechanism is considered to be a potentially  
621 key regulator of morphological development and behavioral differentiation in insects.  
622 Paradoxically, many insects have lost key elements of the DNA methylation toolkit, including  
623 DNMT1 and DNMT3, as is the case for *Drosophila melanogaster* <sup>148</sup>. In order to see if this pathway  
624 may be worth further investigation for the study of morphological development in water striders,  
625 we searched for several core elements that regulate this molecular process. Although we found  
626 that the water strider genome does possess *DNMT1*, which is essential for the maintenance of  
627 DNA methylation, and *DNMT2*, the protein of which functions to methylate tRNAs, the *Gerris*  
628 *buanoi* genome does not contain an ortholog of *DNMT3*, which is essential for de novo DNA  
629 methylation. It is hard to predict the significance of *Gerris buanoi* lacking *DNMT3* because the  
630 presence versus absence of this gene is quite erratic across insects <sup>149</sup>. Although it may be  
631 associated with the capacity for elaborate environmentally-dependent developing processes,  
632 including those that are polyphenic as it is found in a range of invertebrates including the pea  
633 aphid <sup>150</sup>, *Daphnia* <sup>151</sup>, termites <sup>152</sup> and various hymenoptera including bees and ants that are  
634 highly plastic <sup>134,153,154</sup>. Still, there are other highly conserved epigenetic processes, such as histone  
635 modifications, which are conserved in *Gerris buanoi*, and may serve as alternative mechanisms for  
636 the regulation of developmental plasticity.

637

### 638 **Histone genes and histone modification machinery**

639 Chromatin remodelling, via post-translational modifications of histones, is a key regulator of gene  
640 expression. These epigenetic processes have been associated with environmental responsiveness  
641 and phenotypic plasticity <sup>155</sup>. One of the most striking cases of plasticity in the Gerridae is  
642 associated with wing development <sup>156</sup>. Most species of this family exhibit winged and wingless

643 morphs known as apterous and macropterous morphs<sup>156,157</sup>. Wing development is influenced by  
644 both genetic and environmental factors such as habitat stability, day/night cycle and latitude  
645<sup>130,131,158</sup>. Other cases of phenotypic plasticity include leg length, pigmentation, and a set of  
646 secondary sexual traits in both males and females<sup>159</sup>. While our understanding of the ecology of  
647 these cases of phenotypic plasticity is increasingly richer, the lack of a water strider genome has  
648 hindered studies of the genetic and developmental factors associated with them. We therefore  
649 analysed the *Gerris buenoi* genome content in search for components of the epigenetic  
650 machinery.

651 In the *Gerris buenoi* genome we could identify 49 histone proteins encoding loci, a moderately  
652 large number of genes similar to that found in *Cimex lectularius* and *Daphnia pulex*, but  
653 substantially smaller than that detected in the *Aedes aegypti* or *Drosophila* genomes  
654 (Supplementary Table 16). We identified genes encoding the five major classes of histone proteins  
655 (H2A, H2B, H3, H4 and the linker histone H1) as well as copies of genes encoding the variant  
656 histones H2AV and H3.3. In *Drosophila* the histone genes are present in the genome in large  
657 numbers of quintet clusters, each cluster having one gene from each of the five classes of  
658 histones. A similar organization was found in the *Gerris buenoi* genome where two canonical  
659 quintet clusters were identified. Both of them consists of one copy of each of the four classes of  
660 core histone proteins (H2A, H2B, H3 and H4) and a single copy of the linker histone (H1)  
661 (Supplementary Figure 10). Additional clusters were identified, including one modified cluster  
662 containing two copies of the linker histone (H1) and two copies of the H2B core histone, but no  
663 copy of the core histone H3, as well as five truncated clusters made of three or four genes  
664 including H3 core histone gene and combinations of the other histone genes (Supplementary  
665 Figure 10). The number of these clusters is higher compared to the genomes of the milkweed bug  
666 *Oncopeltus fasciatus* and the bed bug *Cimex lectularius*, which contain one and two clusters

667 respectively <sup>9,82</sup>. The functional significance of these clusters remains unknown, thus opening new  
668 avenues in the study of the relationship between epigenetics and phenotypic plasticity <sup>160</sup>.

669 Histone proteins can be post-translationally modified to dynamically influence the structure of the  
670 chromatin. We found in the *Gerris buenoi* genome genes responsible for all classes of histone  
671 modifications: histone acetyltransferases, deacetylases, methylases and demethylases.  
672 Interestingly, we found a duplication of the histone acetyltransferases *males absent on the first*  
673 (*mof*) and *chateau* (*chm/HAT1*). *Mof* functions in dosage compensation and genome stability in  
674 *Drosophila* <sup>161,162</sup>. Duplications of *mof* and *chm* have previously been reported for *Acyrtosiphon*  
675 *pisum* and were thought to be unique <sup>163</sup> although *mof* duplication was also recently detected in  
676 *Oncopeltus fasciatus* <sup>9</sup> and *Cimex lectularius* <sup>82</sup>. Phylogenetic analysis indicates the duplications  
677 that have occurred in these species are independent of the duplication that occurred in  
678 *Acyrtosiphon pisum* and likely occurred early in the heteropteran lineage ~250 million years ago  
679 (Supplementary Figure 11). Unusually, we also identified a duplication of the *Gerris buenoi* histone  
680 deacetylase *Sirt1* (*sir2*) and *Sirt5*; and the histone methyltransferase *grappa*. *Sirt1* is a nuclear and  
681 cytoplasmic deacetylase that has a role in histone modifications <sup>164</sup> and has been associated with  
682 enhanced stress response and life-span extension in numerous species <sup>163,165,166</sup>. *Grappa*, histone  
683 methyltransferase, modifies the lysine (K)79 residue of histone H3 and has been implicated in the  
684 stress response in *Drosophila* providing protection against oxidative and caloric stress <sup>167</sup>.  
685 Interestingly, duplications of *Grappa* have not been detected in any other hemipteran species.

686 In conclusion, the high number of histone clusters found as well as the duplication of some post-  
687 translational modifications of histones genes open up exciting future research possibilities for  
688 understanding their role in environmental responsiveness and phenotypic plasticity in *Gerris*  
689 *buenoi*.

690

**691 Antioxidant Proteins**

692 Reactive oxygen species (ROS), including superoxide radicals ( $O_2^-$ ), hydroxyl radicals ( $OH^-$ ), and  
693 hydroperoxides ( $H_2O_2$ , and  $ROOH$ ), are generated by aerobic metabolism but may also be  
694 encountered in an organism diet or environment<sup>168-170</sup>. Moderate levels of ROS drive a variety of  
695 processes including cellular signaling, transcriptional regulation, as well many other physiological  
696 processes. However, inability to regulate ROS concentrations can result in the accumulation of  
697 ROS-induced damaged lipids, proteins, and nucleic acids<sup>168-170</sup>. Animals have evolved a complex  
698 system of antioxidant enzymes and molecules, facilitating the modulation of ROS levels<sup>169,171-173</sup>.  
699 The enzymatic antioxidant system is comprised of a diverse suite of proteins that can be divided  
700 into clades based on their modes of action. Catalase (CAT), superoxide dismutase (SOD), and a  
701 variety of peroxidases make up the core of the antioxidant response. Thioredoxins and methionine  
702 sulphoxide reductases form a secondary system for managing ROS<sup>171,172</sup>.

703 Thirty putative proteins in seven families related to antioxidant capacity were identified within the  
704 *G. buenoi* genome. The thirty antioxidant response proteins showed high homology to related  
705 proteins in other published genomes including *Acyrtosiphon pisum*, *Apis mellifera*, *Bombyx mori*,  
706 *Cimex lectularis*, *Drosophila melanogaster*, *Pediculus humanus*, and *Tribolium castaneum* (see  
707 Supplementary Methods). In most comparisons, homologs in *C. lectularis* genome showed the  
708 highest degree of similarity (Supplementary Table 17). Representatives of all major antioxidant  
709 enzyme clades were identified in the *G. buenoi* genome assembly including a *Catalase*-like gene,  
710 four heme-binding peroxidases, multiple glutathione-s-transferases, peroxidase, multiple  
711 peroxiredoxins, and superoxide dismutases. This representation suggests that the *G. buenoi*  
712 genome contains a complete suite of antioxidant enzymes. There is no apparent expansion or  
713 reduction in the gene families that were surveyed in this analysis, however further investigation  
714 through additional annotation and experimental validation may reveal otherwise.

715

716 **Supplementary Methods**717 **Genome sequencing and assembly**

718 *Gerris buenoi* is one of thirty arthropod species sequenced as a part of a pilot project for the i5K  
719 arthropod genomes project at the Baylor College of Medicine Human Genome Sequencing Center.  
720 For all of these species, an enhanced Illumina-ALLPATHS-LG sequencing and assembly strategy  
721 enabled multiple species to be approached in parallel at reduced costs. For most species, including  
722 *Gerris buenoi*, we sequenced four libraries of nominal insert sizes 180bp, 500bp, 3kb and 8kb. The  
723 amount of sequence generated from each of these libraries is noted in Supplementary Table 18  
724 with NCBI SRA accessions. The 180bp, 500bp and 3kb mate pair libraries were made from a single  
725 male individual, and the 8kb mate pair library from female genomic DNA.

726 To prepare the 180bp and 500bp libraries, we used a gel-cut paired end library protocol. Briefly, 1  
727 µg of the DNA was sheared using a Covaris S-2 system (Covaris, Inc. Woburn, MA) using the 180-bp  
728 or 500-bp program. Sheared DNA fragments were purified with Agencourt AMPure XP beads, end-  
729 repaired, dA-tailed, and ligated to Illumina universal adapters. After adapter ligation, DNA  
730 fragments were further size selected by agarose gel and PCR amplified for 6 to 8 cycles using  
731 Illumina P1 and Index primer pair and Phusion® High-Fidelity PCR Master Mix (New England  
732 Biolabs). The final library was purified using Agencourt AMPure XP beads and quality assessed by  
733 Agilent Bioanalyzer 2100 (DNA 7500 kit) determining library quantity and fragment size  
734 distribution before sequencing.

735 The long mate pair libraries with 3kb or 8kb insert sizes were constructed according to the  
736 manufacturer's protocol (Mate Pair Library v2 Sample Preparation Guide art # 15001464 Rev. A  
737 PILOT RELEASE). Briefly, 5 µg (for 2 and 3-kb gap size library) or 10 µg (8-10 kb gap size library) of

738 genomic DNA was sheared to desired size fragments by Hydroshear (Digilab, Marlborough, MA),  
739 then end repaired and biotinylated. Fragment sizes between 3-3.7 kb (3kb) or 8-10 kb (8kb) were  
740 purified from 1% low melting agarose gel and then circularized by blunt-end ligation. These size  
741 selected circular DNA fragments were then sheared to 400-bp (Covaris S-2), purified using  
742 Dynabeads M-280 Streptavidin Magnetic Beads, end-repaired, dA-tailed, and ligated to Illumina PE  
743 sequencing adapters. DNA fragments with adapter molecules on both ends were amplified for 12  
744 to 15 cycles with Illumina P1 and Index primers. Amplified DNA fragments were purified with  
745 Agencourt AMPure XP beads. Quantification and size distribution of the final library was  
746 determined before sequencing as described above.

747 Sequencing was performed on Illumina HiSeq2000s generating 100bp paired end reads. Reads  
748 were assembled using ALLPATHS-LG (v35218) <sup>174</sup> on a large memory computer with 1Tbyte of RAM  
749 and further scaffolded and gap-filled using in-house tools Atlas-Link (v.1.0) and Atlas gap-fill (v.2.2)  
750 (<https://www.hgsc.bcm.edu/software/>). This yielded an assembly of 1,000.16 Mb (653 Mb  
751 without gaps within scaffolds) with a contig N50 of 3.8 kb and scaffold N50 of 344kb which has  
752 been deposited in the NCBI: GenBank assembly accession GCA\_001010745.1

753

#### 754 **Automated Gene Annotation Using a Maker 2.0 Pipeline Tuned for Arthropods**

755 Of 30 attempted i5K pilot species, 28 i5K pilot genome assemblies including *G. buenoi* were  
756 subjected to automatic gene annotation using a Maker 2.0 annotation pipeline tuned specifically  
757 for arthropods. The pipeline is designed to be systematic providing a single consistent procedure  
758 for the species in the pilot study, scalable to handle 100's of genome assemblies, evidence guided  
759 using both protein and RNA-seq evidence to guide gen models, and targeted to utilize extant  
760 information on arthropod gene sets. The core of the pipeline was a Maker 2 <sup>175</sup> instance, modified  
761 slightly to enable efficient running on our computational resources. The genome assembly was

762 first subjected to de-novo repeat prediction and CEGMA analysis to generate gene models for  
763 initial training of the ab-initio gene predictors. Three rounds of training of the Augustus<sup>176</sup> and  
764 SNAP<sup>177</sup> gene predictors within Maker were used to bootstrap to a high quality training set. Input  
765 protein data included 1 million peptides from a non-redundant reduction (90% identity) of Uniprot  
766 Ecdysozoa (1.25 million peptides) supplemented with proteomes from eighteen additional species  
767 (*Strigamia maritima*, *Tetranychus urticae*, *Caenorhabditis elegans*, *Loa loa*, *Trichoplax adhaerens*,  
768 *Amphimedon queenslandica*, *Strongylocentrotus purpuratus*, *Nematostella vectensis*,  
769 *Branchiostoma floridae*, *Ciona intestinalis*, *Ciona savignyi*, *Homo sapiens*, *Mus musculus*, *Capitella*  
770 *teleta*, *Helobdella robusta*, *Crassostrea gigas*, *Lottia gigantea*, *Schistosoma mansoni*) leading to a  
771 final 'nr' peptide evidence set of 1.03 million peptides. RNA-seq transcription data derived from  
772 mixed sex embryo's and nymphs (Supplementary Table 18) was used judiciously to identify exon-  
773 intron boundaries but with a heuristic script to identify and split erroneously joined gene models.  
774 We used CEGMA models for QC purposes: for *Gerris buenoi*, of 1,977 CEGMA single copy ortholog  
775 gene models, 1,783 were found in the assembly and 1,895 in the final predicted gene set – a  
776 reasonable result given the small contig sizes of the assembly. We assume the gene predictors  
777 could pull together exons from different contigs with greater success than the sequence  
778 comparison used to identify CEGMA genes in the assembly, generating the larger number of  
779 control gene models found in the gene set than the underlying assembly. Finally, the pipeline uses  
780 a nine-way homology prediction with human, *Drosophila* and *Caenorhabditis elegans*, and InterPro  
781 Scan5 to allocate gene names. The automated gene sets are available from the National  
782 Agricultural Library ([https://i5k.nal.usda.gov/Gerris\\_buenoi](https://i5k.nal.usda.gov/Gerris_buenoi)) where a web-browser of the genome,  
783 annotations, and supporting annotation data is accessible.

784



## 785 **Community annotation and Official Gene Set generation**

786 The National Agricultural Library's i5k Workspace@NAL <sup>178</sup> implemented the Apollo manual  
787 annotation software <sup>179</sup> to facilitate community annotation of the *Gerris buenoi* genome  
788 (<https://apollo.nal.usda.gov/gerbue/jbrowse/>). Volunteer annotators received training in manual  
789 annotation via webinar, and were asked to follow a set of annotation guidelines (  
790 <https://i5k.nal.usda.gov/content/rules-web-apollo-annotation-i5k-pilot-project>). Once completed,  
791 the manual annotations were checked for quality and merged with the automated MAKER2  
792 annotations Gbue\_0.5.3 using the NAL's GFF3toolkit pipeline ([https://github.com/NAL-  
793 i5K/GFF3toolkit/](https://github.com/NAL-i5K/GFF3toolkit/)). Locally unique IDs were generated using in-house scripts, resulting in the non-  
794 redundant Official Gene Set OGSv1.0 ([ADC URL here](#)). Community annotators contributed or  
795 modified 1 134 genes, comprising 1 251 mRNAs and 14 pseudogenes, resulting in 21 2015 mRNAs  
796 and 14 pseudogenes in the combined OGSv1.0.

797

## 798 **Bristle genes**

799 Bristle development genes were annotated by performing tblastn searches on the *Gerris buenoi*  
800 scaffolds with the corresponding *Drosophila* gene protein sequences available in FlyBase (release  
801 6)<sup>180</sup>. To confirm orthology, *Gerris buenoi* models were blasted into NCBI 'nr' database. Homology,  
802 intron/exon boundary assessments, and protein sequence completeness were identified by  
803 manual inspection using RNA-seq alignments available and protein alignments generated with  
804 Clustal Omega (<http://www.ebi.ac.uk/Tools/msa/clustalo/>).

805

## 806 **Cuticular proteins**

807 Sequence motifs that are characteristic of several families of cuticle proteins <sup>181</sup> were used to

808 search the genome of *Gerris buenoi* for putative cuticle proteins. 155 genes were identified,  
809 analyzed with CutProtFam-Pred, a cuticular protein family prediction tool described in Ioannidou  
810 et al.<sup>182</sup>, and assigned to one of 5 families (CPR, CPAP1, CPAP3, CPF, and TWDL).

811

## 812 **Prey detection and selection on water environments**

813 The approach for manual annotation is similar to that used to characterize these three gene  
814 families in many other insects, including *Acyrtosiphon pisum*<sup>83</sup>, *Pediculus humanus*<sup>17</sup>, *Rhodnius*  
815 *prolixus*<sup>81</sup>, *Cimex lectularius*<sup>82</sup> and *Oncopeltus fasciatus*<sup>9</sup>. Briefly, exhaustive and iterative tblastn  
816 searches of the genome assembly with the proteins from these other heteropterans were used to  
817 find genes, which were modelled as best possible in the WebApollo browser at the i5k site. This  
818 effort was sometimes assisted by RNA-seq reads that cross introns in the available whole-body  
819 RNA-seq set, however most of these genes were not represented in that dataset. In addition, like  
820 *Oncopeltus fasciatus* this genome assembly is rather fragmented, so many of the models are  
821 incomplete, while some were joined across scaffolds and a few were improved with raw reads.  
822 Several additional gene fragments too short to include in this compilation remain for the OR and  
823 GR families and might represent additional intact genes, while some of the partial models might  
824 actually be pseudogenes. Many of these proteins are extremely divergent, and because almost  
825 none of them were modelled by the genome-wide automated annotation (models that might have  
826 facilitated searches for distant relatives using BLASTP), TBLASTN searches to find distant relatives  
827 used E values of 1000. The last two exons of the OR and GR families typically encode the most  
828 conserved regions of these proteins and are flanked by phase 0 introns, so their encoded protein  
829 sequences were used in TBLASTN searches with LQ before and VS afterwards, representing  
830 consensus splice acceptor and donor sites, to assist in finding divergent relatives. Multiple  
831 alignments of each family along with representatives from other species and maximum likelihood

832 phylogenetic analyses of the proteins were conducted, and the tree figures prepared, as in Panfilio  
 833 et al. <sup>9</sup>. All of the proteins are included at the end of this supplementary text, and the gene models  
 834 and transcribed mRNAs for most of them are available from the i5k Workspace at the National  
 835 Agriculture Library (<https://i5k.nal.usda.gov/>) and will eventually be available from the NCBI.

836

### 837 **Wing polyphenism**

838 First, we limited our analysis to genes whose complete coding sequences had been identified and  
 839 annotated in the following four categories: genes involved in wing polyphenism, juvenile hormone  
 840 regulation, the insulin signalling pathway, and reproduction. We then used the bioinformatics-  
 841 based metric described by Elango *et al.* <sup>138</sup> called CpG<sub>O/E</sub> as a proxy for mutations induced by  
 842 methylation of CpG islands in the germ line over evolutionary time. This CpG<sub>O/E</sub> metric uses a  
 843 historical (evolutionary) measure of the level of DNA methylation by estimating the amount of  
 844 CpG dinucleotide depletion normalized for GC content for each gene of interest. The CpG<sub>O/E</sub>  
 845 metric, or CpG dinucleotide depletion normalized for GC, is a proxy for DNA methylation in the  
 846 coding sequence of these genes. We define the CpG<sub>O/E</sub> for each gene as follows:

$$847 \quad C_P G_{O/E} = \frac{P_{CpG}}{P_C P_G}$$

848 where CpG<sub>O/E</sub> is an estimation of the DNA methylation levels, P<sub>CpG</sub> is the frequency of CG  
 849 dinucleotides, P<sub>C</sub> is the frequency of cytosine nucleotides, and P<sub>G</sub> is the frequency of guanine  
 850 nucleotides <sup>183,184</sup>. After cytosine is methylated, it is more amenable to deamination <sup>184</sup>. Over time,  
 851 this leads to the reduction of CpG dinucleotides from methylated CpG regions <sup>184</sup>. Using a custom  
 852 Perl script, we evaluated the CpG<sub>O/E</sub> in the coding sequences of all predicted genes in the *Gerris*  
 853 *buanoi* genome and the CpG<sub>O/E</sub> in the coding sequences of our genes of interest (Supplementary  
 854 Table 15).

855 Second, we compared the mean CpG<sub>O/E</sub> content for our genes of interest to the mean CpG<sub>O/E</sub> for all  
856 the genes in the genome by executing a Monte-Carlo randomization procedure as described  
857 previously<sup>134-138</sup>. Briefly, we randomly selected 50 CpG<sub>O/E</sub> values from the genome to produce a  
858 random distribution, calculated the mean, and repeated this process 10000 times. All mean CpG<sub>O/E</sub>  
859 values were plotted and this distribution was compared to the mean CpG<sub>O/E</sub> values for each of our  
860 candidate gene sets. Gene sets were determined to be significantly different from the randomly  
861 generated mean CpG<sub>O/E</sub> if they fell within the bottom or top 5% of values. These analyses were  
862 repeated for *Rhodnius proxilus* orthologues of the *Gerris buenoi* genes in our gene sets.

863

#### 864 **Wnt Signaling Pathway**

865 Protein sequences for *Wnt* ligands as well as receptors and downstream components  
866 (*armadillo/beta-catenin, dishevelled, frizzled, arrow, axin, shaggy/ GSK-3*) from *Drosophila*  
867 *melanogaster, Tribolium castaneum, Acyrthosiphon pisum* and *Oncopeltus fasciatus*, were  
868 retrieved from NCBI, and used to perform standalone tblastn searches on the *Gerris buenoi*  
869 scaffolds with a maximum e-value of  $1e^{-10}$ . Hits from all species together were ordered by scaffold  
870 and start position, and for each group of overlapping or closely adjacent hits from multiple  
871 orthologous queries, the putative gene name was identified by blasting back the hit sequence  
872 against GenBank, with a taxonomic restriction to Arthropoda accessions. The query sequences  
873 with the best hits (lowest e-values) for each gene were then used to identify the model to be  
874 curated, by doing a tblastn search into the *Gerris* scaffolds from the Blast instance at the National  
875 Agricultural Library ([https://i5k.nal.usda.gov/legacy\\_blast](https://i5k.nal.usda.gov/legacy_blast)). The Blast results were visualized in the  
876 Web Apollo instance for *Gerris buenoi* (<https://apollo.nal.usda.gov/gerbue/selectTrack.jsp>), where  
877 the corresponding automated annotation models were edited. To confirm orthology, we then  
878 Blasted the edited *Gerris buenoi* models back into GenBank. Homology, intron/exon boundary

879 assessments, and protein sequence completeness were identified by manual inspection and  
880 correction of protein alignments generated with Clustal Omega  
881 (<http://www.ebi.ac.uk/Tools/msa/clustalo/>).

882 The numbering (subfamily identification) for *Wnt and fz* orthologs was assigned based on the  
883 corresponding vertebrate homolog (the naming of *Drosophila* orthologs was changed accordingly),  
884 based on phylogenetic analyses done at <http://www.phylogeny.fr/>.

885 Possible gene loci duplications were identified by performing tblastn searches on the scaffolds  
886 using the protein sequences of completed *Gerris* annotation models as queries, and then re-  
887 blasting the resulting hit sequences into GenBank for Arthropoda hits.

888

### 889 **Early Developmental Genes**

890 The choice of early developmental genes (Gap, Pair Rule, and Segment Polarity Genes) to annotate  
891 was informed by GO term annotations in *Drosophila melanogaster* (long-germ) and *Tribolium*  
892 *castaneum* (short-germ). Protein sequences for developmental genes for *D. melanogaster* and *T.*  
893 *castaneum* were obtained from <http://flybase.org/><sup>180</sup> and <http://beetlebase.org/><sup>185</sup> respectively.

894 Contig sequences were searched for homology to the selected protein sequences using tblastn.

895 Gene models (Gbue v0.5.3-models) that aligned with the regions of highest homology identified by  
896 tblastn search were selected for further analysis. If no official gene model was present in the region

897 of homology identified by tblastn a de novo model was generated using models generated by the

898 Augustus-masked or snap-masked programme. RNAseq mapped reads were compared with the

899 gene models to determine the transcribed regions. The transcribed regions were used to

900 determine protein sequences of the gene. Protein sequences were utilised in a reciprocal blast

901 (blastx NCBI) to confirm the homology of the orthologs. Gene models were manually edited to

902 produce gene models that resolved conflicts between RNAseq, blastx and homology data.

903

904 **Antioxidant genes**

905 Antioxidant proteins of *Drosophila melanogaster* were utilized to initially identify potential  
906 antioxidant genes within the *Gerris buenoi* genome. The *Drosophila melanogaster* genes were  
907 obtained from FlyBase by generating a query that searched for proteins with Gene Ontology terms  
908 that were related to response to antioxidant activity and responses. These nucleotide sequences  
909 were translated to peptides and were searched against the peptide models of *G. buenoi*. The  
910 highest BLAST hit (blastp) was extracted and searched against arthropod entries of the NCBI non-  
911 redundant database to confirm the identity of the model (blastp). The confirmed model was then  
912 BLAST searched (blastp) against the peptide sequences of *Acyrtosiphon pisum*, *Apis mellifera*,  
913 *Bombyx mori*, *Cimex lectularis*, *Drosophila melanogaster*, *Pediculus humanus*, and *Tribolium*  
914 *castaneum* to extract homologs. The extracted *G. buenoi* model was then aligned to the homologs.  
915 This information and the RNA-seq data present in the WebApollo were used to manually annotate  
916 the model. The corrected model was then once more searched against the arthropod entries of  
917 the NCBI non-redundant database (blastp) to ensure that the model was correctly identified.

918

919

920

921 **Supplementary Figures and Tables**

922

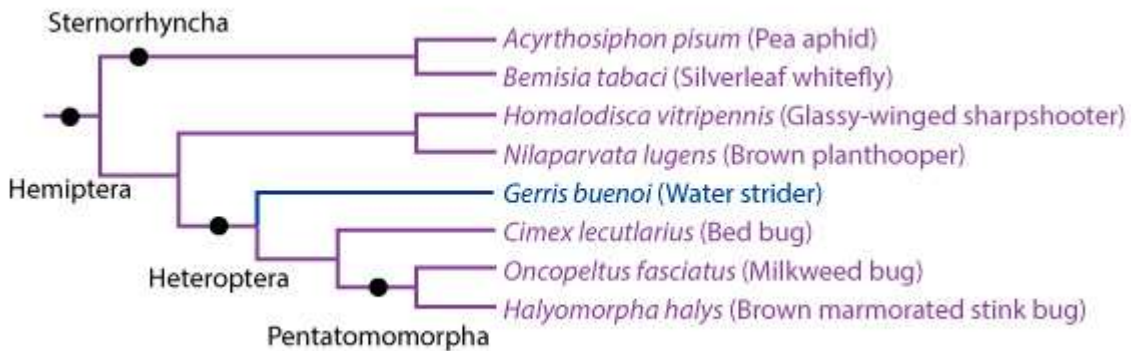

923 Supplementary Figure 1 : Detailed cladogram of Hemiptera species used in Figure 3. The tree is  
 924 based on phylogenetic analyses in <sup>186</sup>. Both trees combined with the absence of third InR copy in *C.*  
 925 *lectularius*, *O. fasciatus* and *H. halys*, suggest that InR1-like duplication is unique to the  
 926 Gerromorpha and occurred at, or close to, their speciation.

927

928

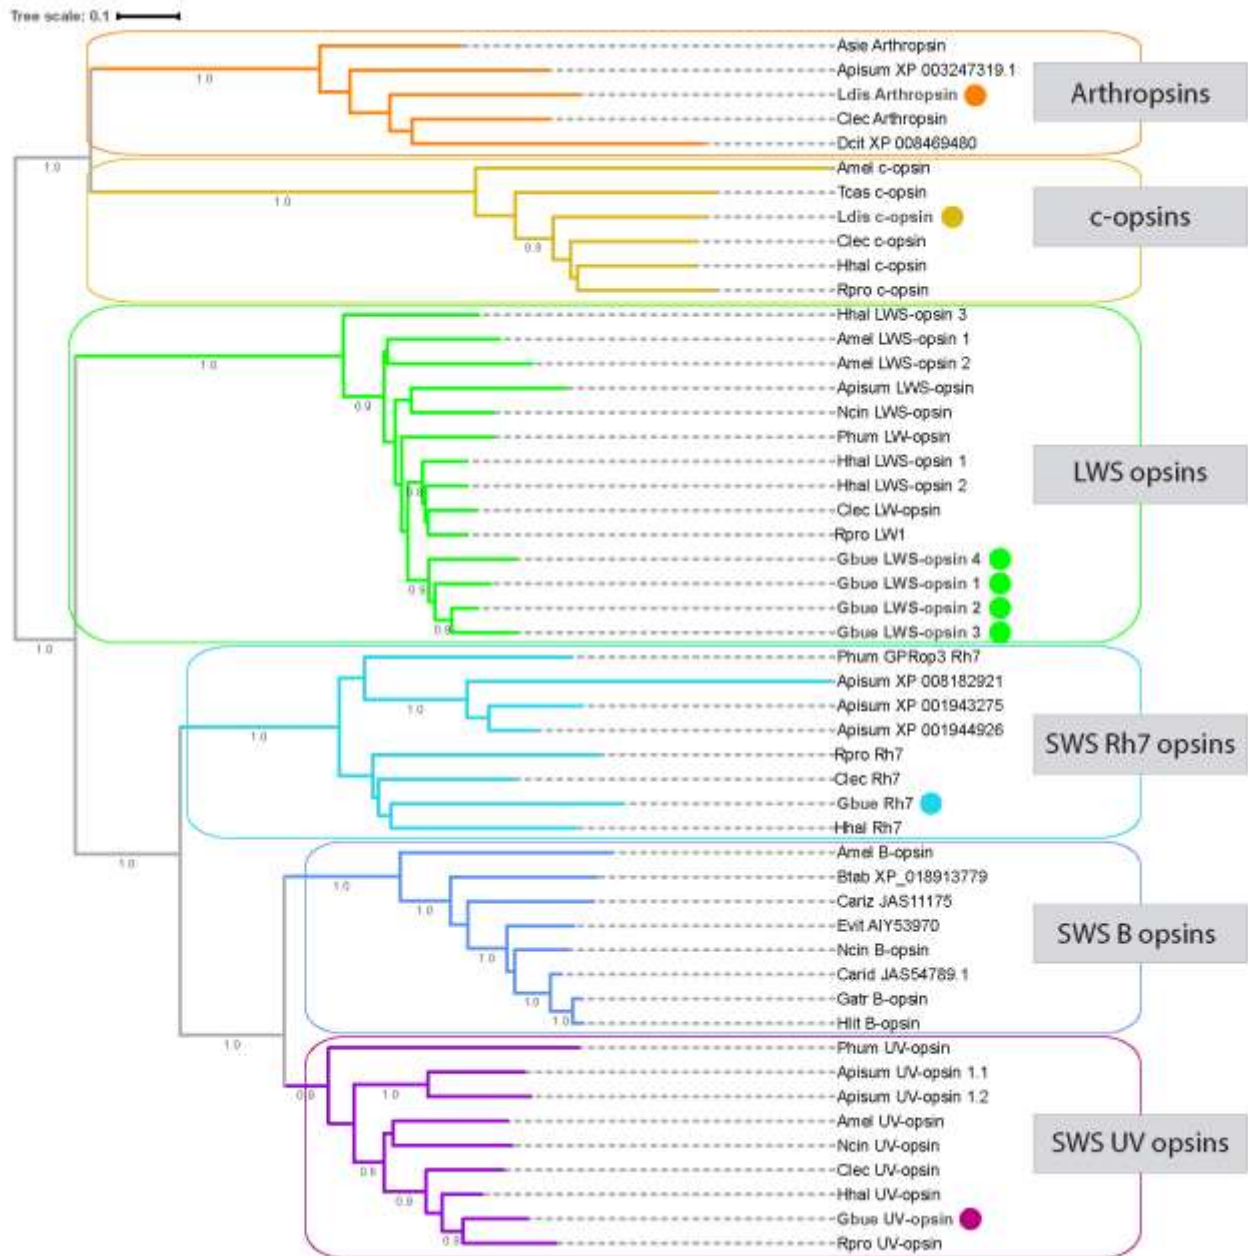

929

Supplementary Figure 2 : Phylogenetic analysis and representative sequences from all major insect opsin subfamilies. Protein sequences were aligned with T-Coffee<sup>187</sup> and ambiguous multiple alignment alignment segments were removed applying the “gappyout” setting of TrimAl (v. 1.3)<sup>188</sup>. A neighbor joining tree was estimated in MEGA version 6.0<sup>189</sup> using gamma-corrected Jones-Taylor-Thornton distances<sup>190</sup> and testing branch support with 1 000 bootstrap samples (numbers at branches). Species abbreviations: Amel = *Apis mellifera*, Apisum = *Acyrtosiphon pisum*, Asie = *Anotogaster sieboldii*, Btab = *Bemisia tabaci*, Cariz = *Clastoptera arizonana*, Clec = *Cimex*



*lectularius*, Carid= *Cuerna arida*, Dcit=*Diaphorina citris*, Evit = *Empoasca vitis*, Gbue = *Gerris buenoi*, Gatr = *Graphocephala atropunctata*, Hhal = *Halyomorpha halys*, Hlit = *Homalodisca liturata*, Ldis = *Limnoporus dissortis*, Ncin = *Nephotettix cincticeps*, Phum = *Pediculus humanus*, Rpro = *Rhodnius prolixus*, Tcas = *Tribolium castaneum*.

930

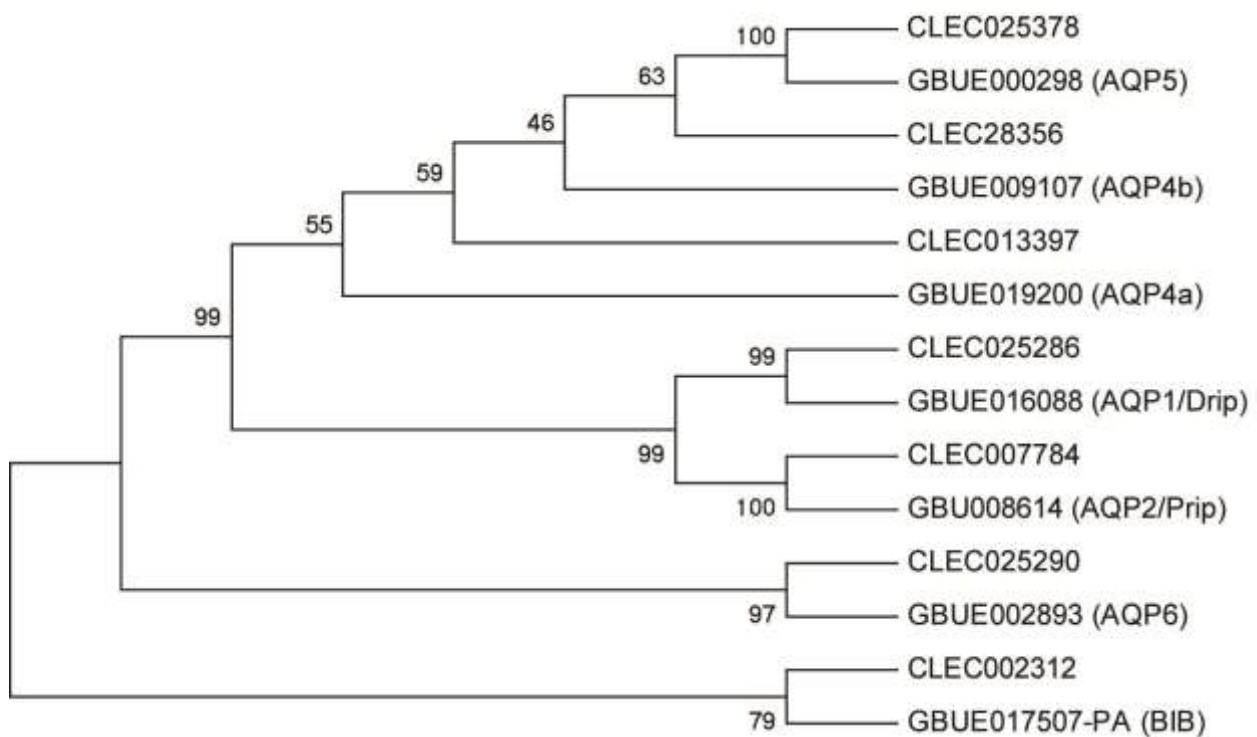

Supplementary Figure 3 : Comparison of predicted aquaporins from *Gerris* and *Cimex* using Neighbor-joining tree produced using MEGA6 using Dayhoff model and pairwise matching; branch values indicate support following 1500 bootstraps; values below 50% are omitted. It includes the seven putative aquaporin (AQP) genes identified from the water strider that includes the typical *Drosophila* integral protein (Drip), AQP2, AQP4 (Two genes), AQP5, AQP6 and Big brain (Bib) genes. In addition to these seven, we identified one other predicted partial sequences with matches to AQP sequences from other insects. Overall the number of aquaporins falls within the range of most insects (6-8) and *Gerris* has members of each group previously identified for insects

82.

932

933

934

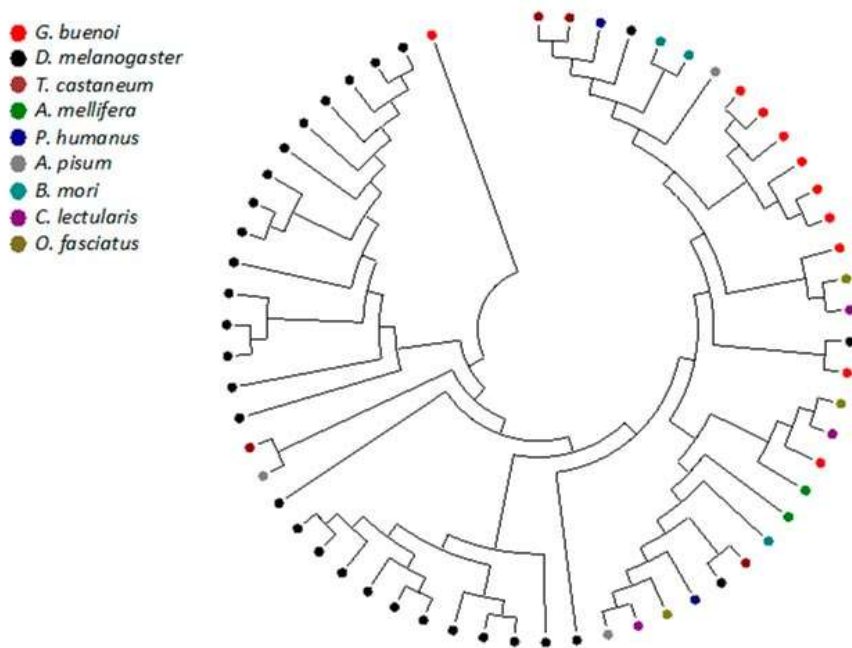

935

Supplementary Figure 4: Phylogenetic tree demonstrating relationships of TWDL genes from *Gerris buenoi*, *Drosophila melanogaster*, *Tribolium castaneum*, *Apis mellifera*, *Pediculus humanus corporis*, *Acyrtosiphon pisum*, *Bombyx mori*, *Cimex lectularius*, and *Oncopeltus fasciatus*. *G. buenoi* showed a greater number of TWDL genes than other insects, with the notable exception of dipterans such as *D. melanogaster*. The tree was constructed using the neighbor-joining method in MEGA6 with Poisson correction and bootstrap replicates (10 000 replicates).

936

937

938

A.

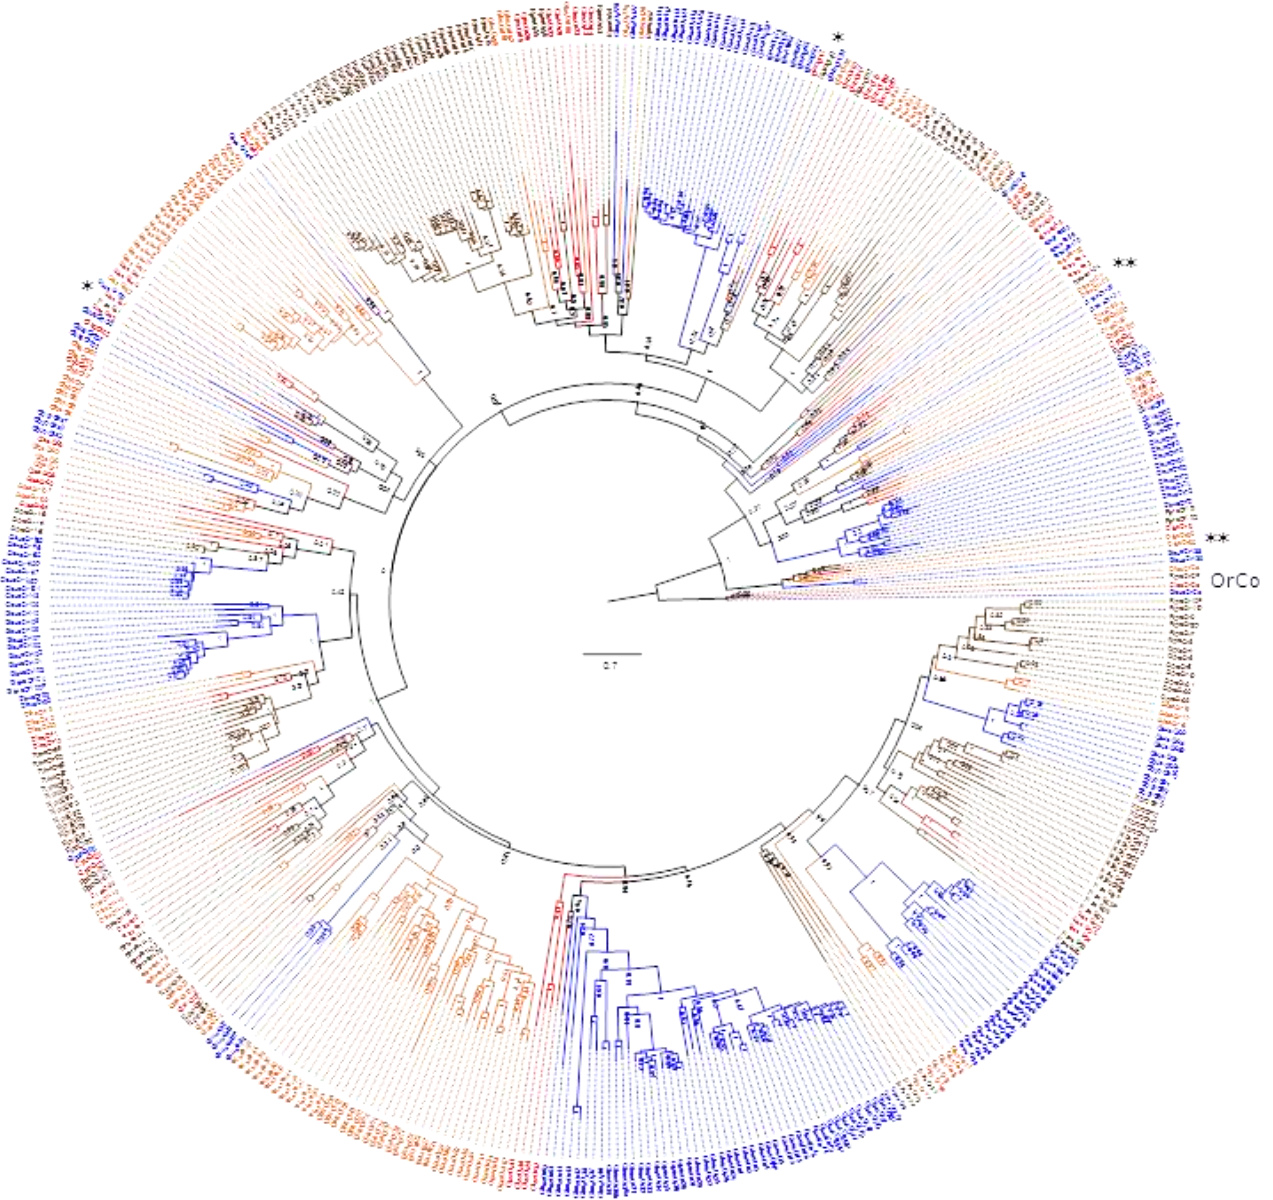

939

B.

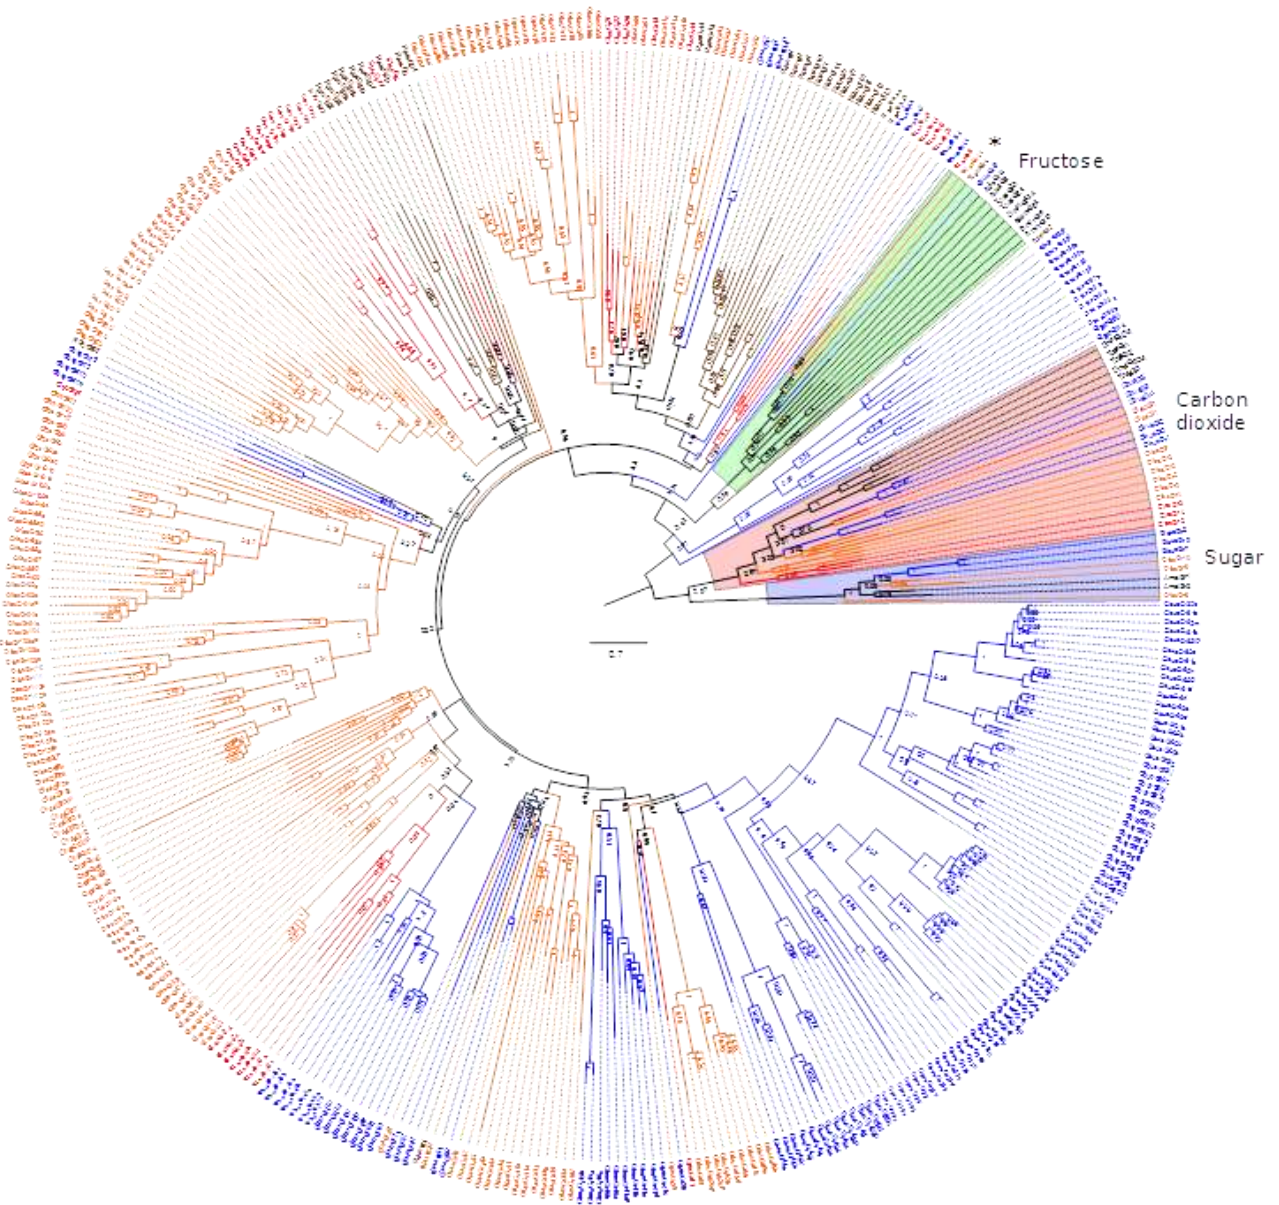



C.

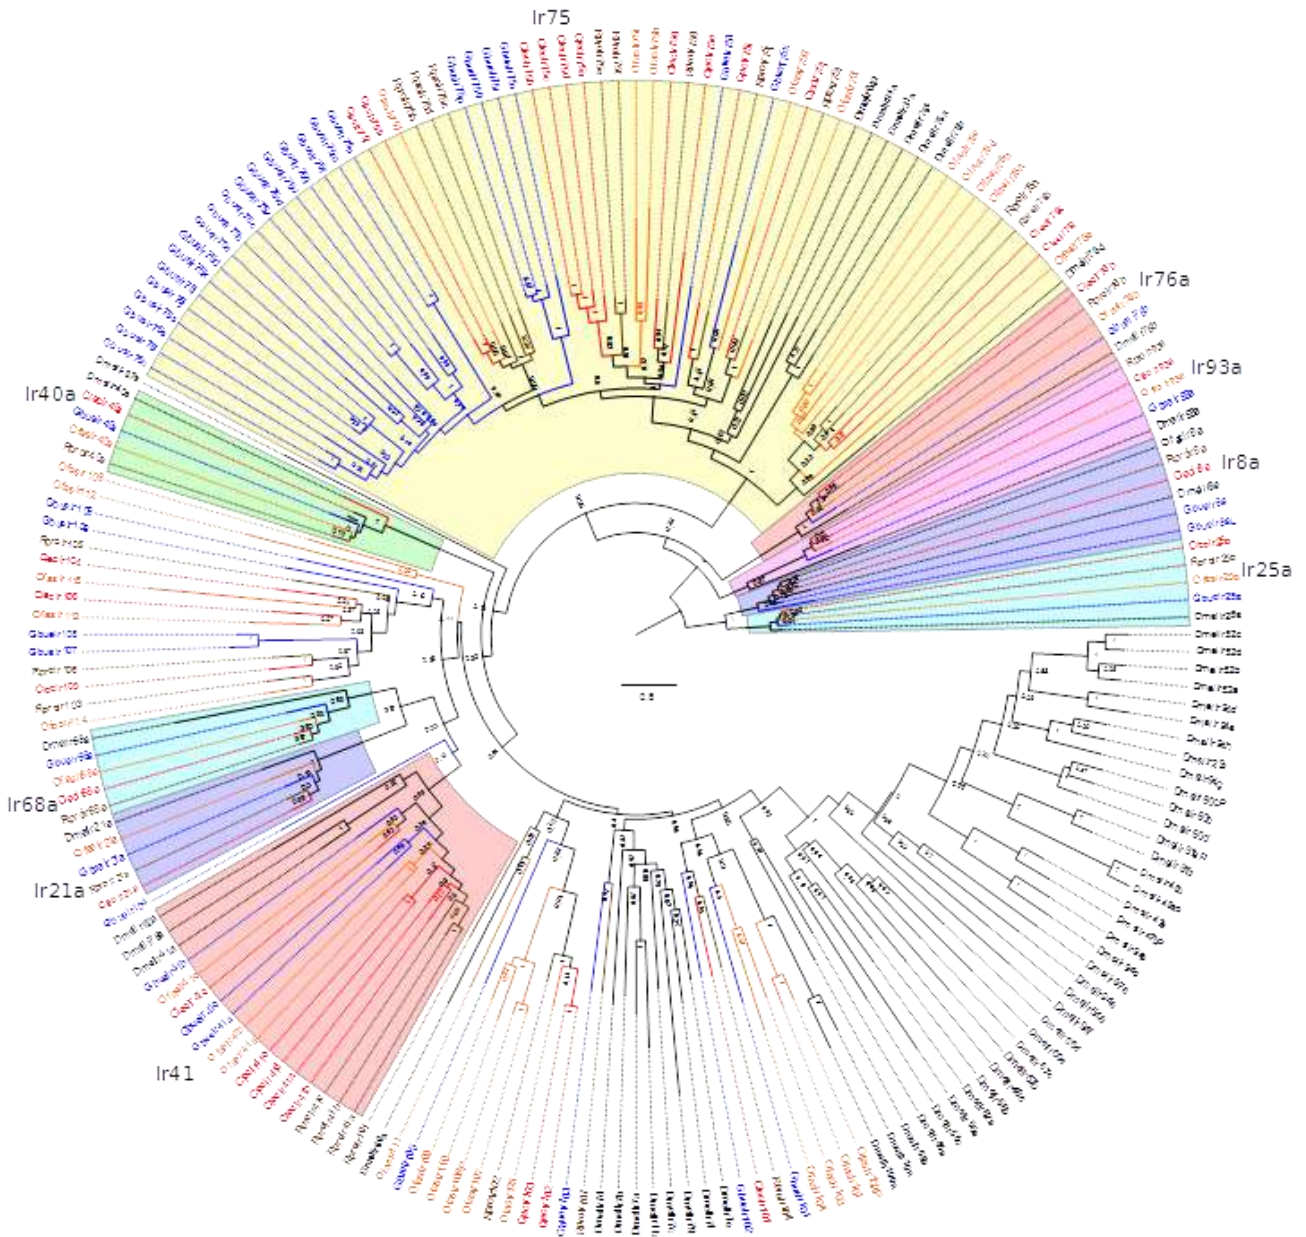

Supplementary Figure 5 : Phylogenetic analysis of the Chemoreceptor families. **(A) Olfactory Receptor family.** The tree was rooted with the highly conserved and basal OrCo proteins. A single asterisk indicates possible simple orthologous relationships and two asterisks indicate slightly more complicated relationships involving independent duplications in one or more species. Protein names and the branches leading to them are colored in blue for *Gerris*, brown for *Rhodnius*, red for *Cimex*, and orange for *Oncopeltus*. A suffix of P after the protein number

indicates a pseudogene, while alternatively-spliced ORs are indicated by lower case letters after the protein number. Support for nodes is the aLRT value from PhyML v3.0. **(B) Gustatory Receptor family.** The tree was rooted with the conserved sugar and carbon dioxide receptor subfamilies. These two subfamilies and the fructose receptor subfamily are highlighted by colored background wedges. **(C) Ionotropic Receptor family.** The tree was rooted with the conserved co-receptor Ir8a and 25a lineages, which closely resemble the ionotropic glutamate receptors from which these variant Ionotropic Receptors evolved. The entire *D. melanogaster* IR repertoire was included for comparison. Lower case suffixes do not indicate alternative-splicing, but rather either orthology with particular *Drosophila* IRs, or the Ir41 and 75 series of genes.

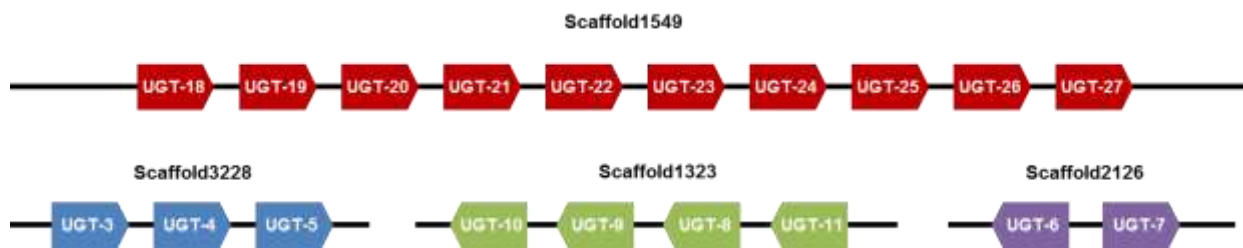

Supplementary Figure 6 : Genomic orientation of UGT genes in a *Gerris buenoi* genomic scaffold. Ten UGT genes are arrayed in a row in Scaffold1549, probably multiplied by gene duplication events.

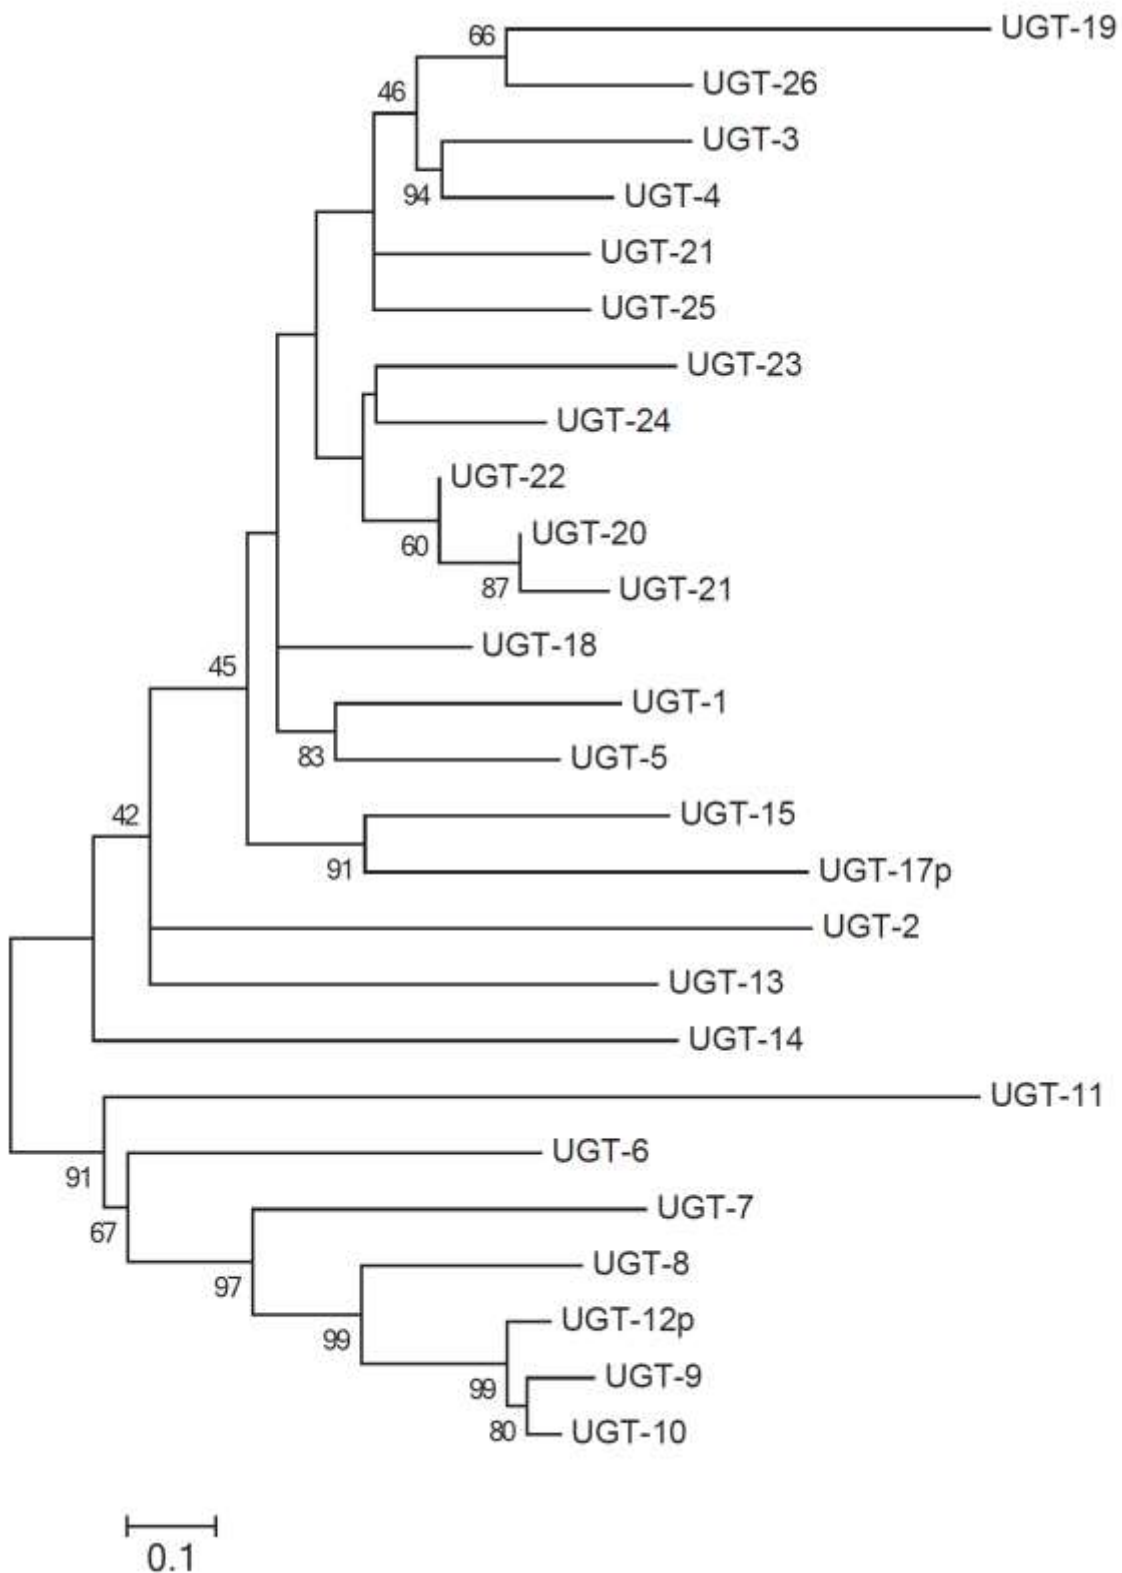

Supplementary Figure 7 : A consensus Maximum-likelihood tree of C-terminal half of the deduced amino acid sequences of *Gerris buenoi* UGTs. The phylogeny was inferred by the method based on the JTT matrix-based model. Bootstrap value was 1 000.



941

942

943

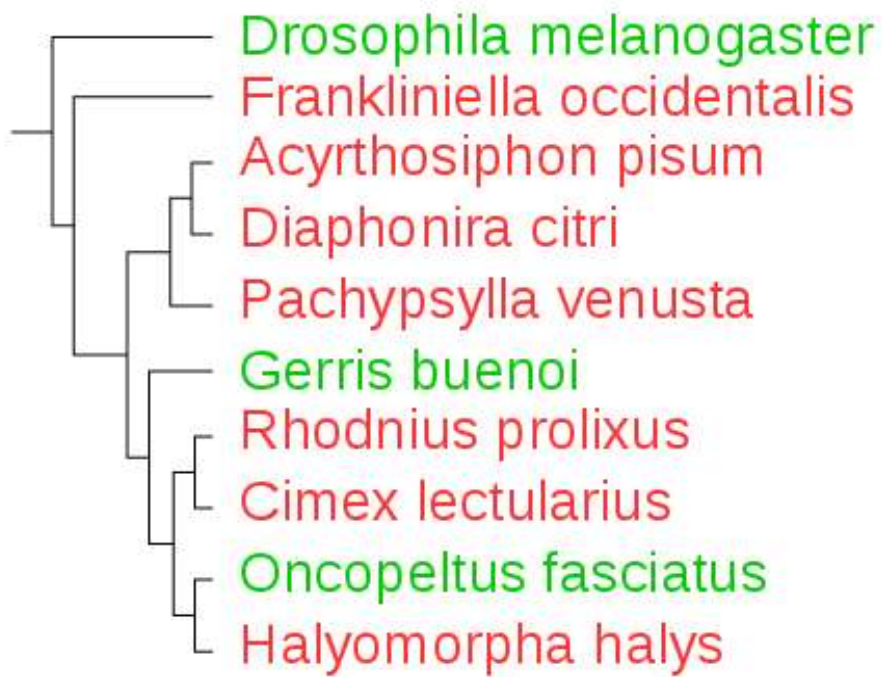

944

Supplementary Figure 8 : Simplified cladogram of Hemiptera based on <sup>186</sup> depicting IMD presence (green) and absence (red).

945

946

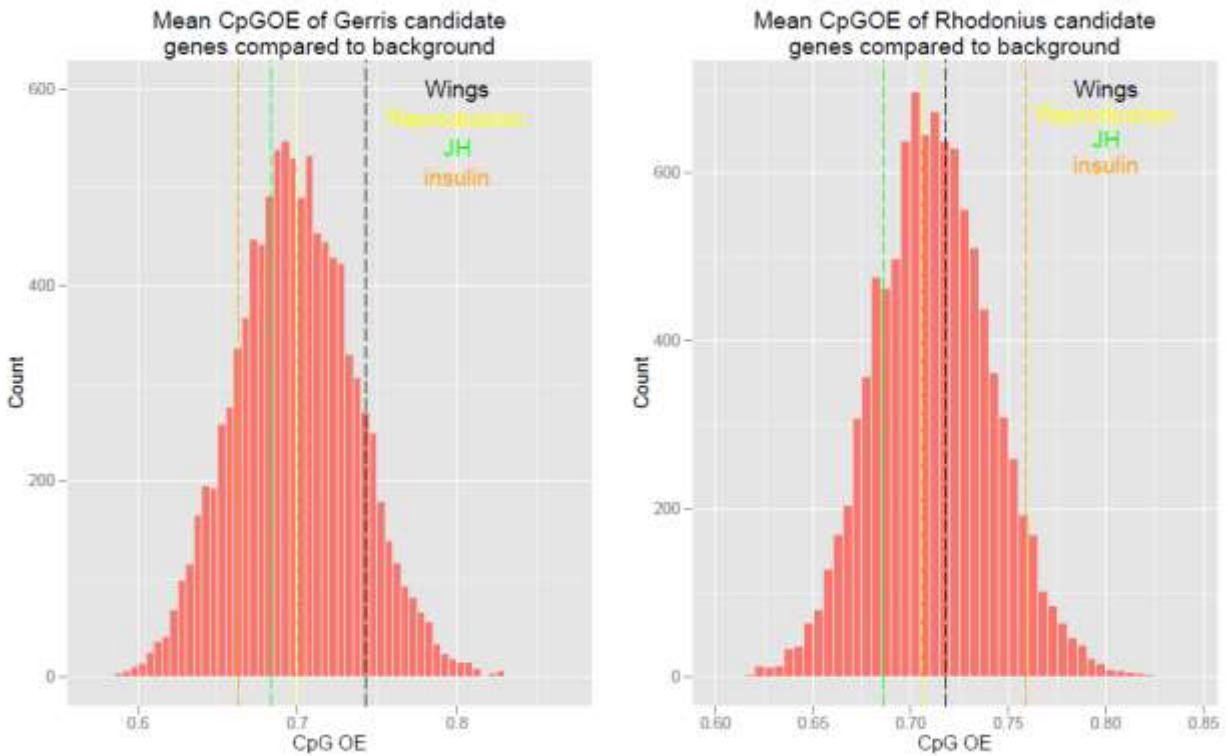

947

Supplementary Figure 9 : Density plot of frequency (y-axis) versus mean  $CpG_{O/E}$  (x-axis) for (A) *Gerris buenoi* ( $n = 20\,949$ ; overall mean = 0.70; mean of wing genes = 0.74; mean of juvenile hormone genes = 0.68; mean of insulin signalling genes = 0.66; mean of reproduction genes = 0.70;  $p > 0.05$ ) and (B) *Rhodnius prolixus* ( $n = 15\,081$ ; overall mean = 0.71; mean of wing genes = 0.72; mean of juvenile hormone genes = 0.69; mean of insulin signalling genes = 0.76; mean of reproduction genes = 0.71;  $p > 0.05$ ). The observed mean for genes in the networks underlying wing polyphenism (black line), reproduction (yellow line), juvenile hormone (green line), and insulin signalling (orange line) plotted relative to the distribution of  $CpG_{O/E}$  values for all genes in the genome (random resampling of mean  $CpG_{O/E}$  from 50 genes in the genome).

948

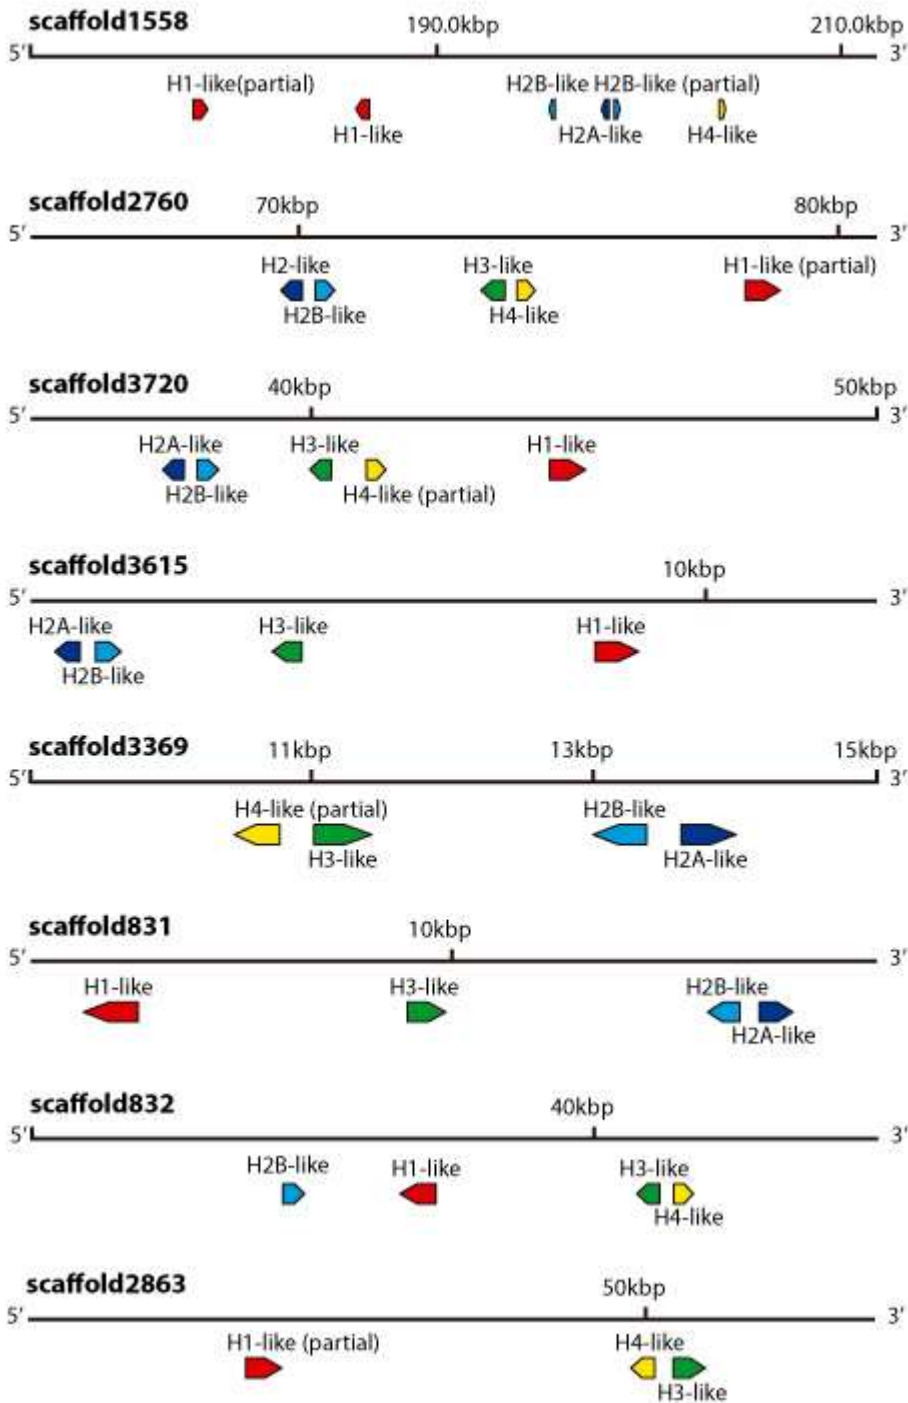

Supplementary Figure 10 : Genomic organisation of the histone loci gene clusters annotated in the *Gerris buenoi* genome. Clusters were defined as more than one histone encoding gene present on a genomic scaffold. No clusters were found that were interrupted by non-histone gene encoding loci. Clusters were visualized using genomertools v1.5.5 and coloured according to orthology group (Histone H1 (red), Histone H2A (dark blue), Histone H2B (light blue), Histone H3 (green), Histone

H4 (yellow).

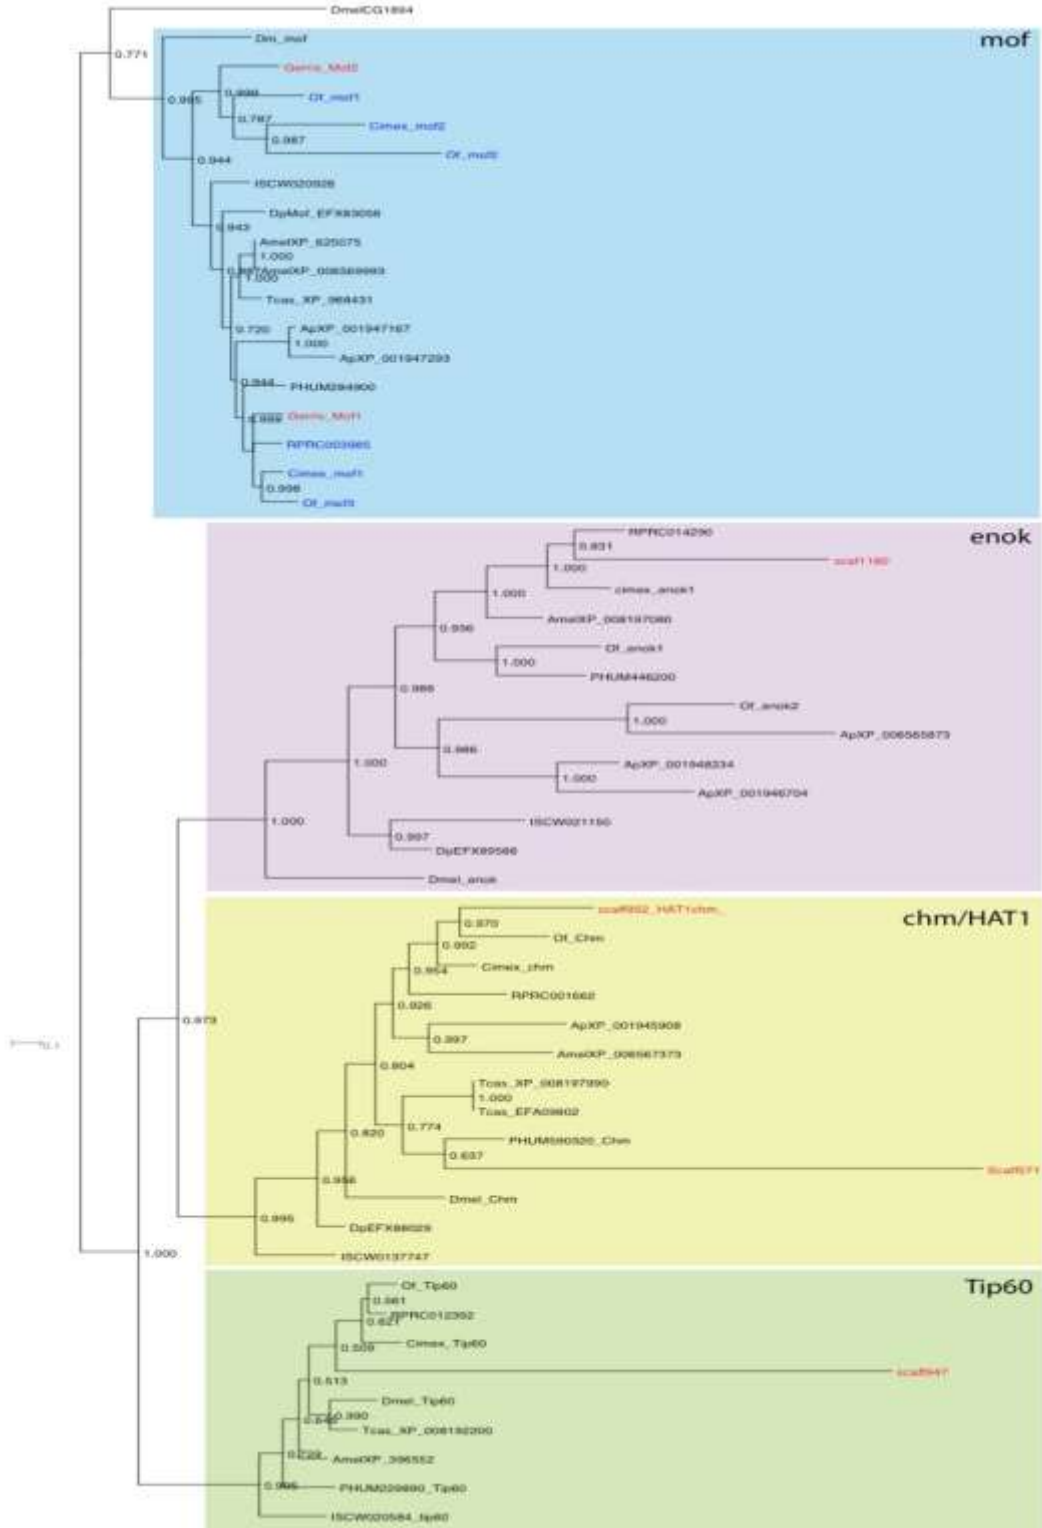

Supplementary Figure 11 : Phylogeny of histone acetyltransferases in Heteropteran lineage.

Results show a duplication of *males absent on the first (mof)* and *chateau (chm/HAT1)* in *Gerris buenoi* similar to previous results in *Oncopeltus fasciatus*<sup>9</sup> and *Cimex lectularius*<sup>82</sup> but also a unique duplication of *Gerris buenoi* histone deacetylase *Sirt1 (sir2)* and *Sirt5*; and the histone methyltransferase *grappa*.

949

|       |                             |
|-------|-----------------------------|
| 1 739 | Complete Single-copy BUSCOs |
| 81    | - of which duplicated       |
| 490   | Fragmented BUSCOs           |
| 446   | Missing BUSCOs              |
| 2 675 | Total BUSCO groups searched |

Supplementary Table 1 : Summarized benchmarks in BUSCO notation

|                                | Complete | - of which duplicated | Fragmented | Missing |
|--------------------------------|----------|-----------------------|------------|---------|
| <i>Drosophila melanogaster</i> | 98       | 6,4                   | 0.6        | 0.3     |
| <i>Danaus plexipus</i>         | 83       | 8.6                   | 11         | 4.3     |
| <i>Apis mellifera</i>          | 93       | 2.9                   | 5.1        | 0.9     |
| <i>Pediculus humanus</i>       | 92       | 3.9                   | 6.1        | 1.6     |
| <i>Daphnia pulex</i>           | 83       | 3.9                   | 11         | 5.1     |
| <i>Tribolium castaneum</i>     | 95       | 5.8                   | 3.9        | 0.8     |
| <i>Acyrtosiphon pisum</i>      | 72       | 6.1                   | 15         | 12      |
| <i>Cimex lectularius</i>       | 78       | 9.7                   | 1,4        | 7.4     |
| <i>Gerris buenoi</i>           | 65       | 3.02                  | 18.32      | 16.67   |

Supplementary Table 2 : BUSCO Genome assessment based on percentage of BUSCO genes identified (<ftp://cegg.unige.ch/OrthoDB7/BUSCO/README.txt>). Species results other than *Gerris buenoi* extracted from supplementary data in <sup>82</sup>.

| Gene                       | Scaffold: start..end                   | Locus length<br>(nt) | Protein<br>length (aa)     | Number of CDS<br>exons   |
|----------------------------|----------------------------------------|----------------------|----------------------------|--------------------------|
| <i>labial -part 1 of 2</i> | Scaffold2148:49081..49463              | 383<br>(partial)     | 208<br>(concat-<br>enated) | 2<br>(concat-<br>enated) |
| <i>labial -part 2 of 2</i> | Scaffold688:18951..20594               | 1 644<br>(partial)   |                            |                          |
| <i>proboscipedia</i>       | Scaffold917:82996..178853<br>- strand  | 95 858               | 498                        | 3                        |
| <i>zerknüllt</i>           | Scaffold917:254614..264809<br>+ strand | 10 196               | 360                        | 3                        |
| <i>Deformed</i>            | Scaffold927:71079..127936              | 56 858               | 339                        | 2                        |
| <i>Sex combs reduced</i>   | Scaffold111:113209..227662<br>- strand | 114 454              | 279                        | 2                        |
| <i>fushi tarazu</i>        | Scaffold111:292364..296153<br>- strand | 3 790                | 298                        | 2                        |
| <i>Antennapedia</i>        | Scaffold111:608939..620195<br>- strand | 11 257               | 284                        | 2                        |
| <i>Ultrabithorax*</i>      | Scaffold280:506616..507456             | 841<br>(partial)     | 178<br>(partial)           | 1<br>(partial)           |
| <i>abdominal-A</i>         | Scaffold259:352274..461324             | 109 051              | 320                        | 3                        |
| <i>Abdominal-B*</i>        | Scaffold464:255292..399249             | 143 958              | 254<br>(partial)           | 2<br>(partial)           |

|                 |                           |         |     |   |
|-----------------|---------------------------|---------|-----|---|
| <i>iroquois</i> | Scaffold451:304431-432356 | 127 926 | 426 | 6 |
| <i>mirror</i>   | Scaffold2206:85783-151112 | 65 330  | 362 | 5 |

Supplementary Table 3 : Positional information for the annotated homeobox genes. Incomplete gene models are marked with an asterisk (\*). Colored shading highlights gene linkage, and coding strand is also indicated for these gene models.

950

| <b>Gene name</b>                    | <b>Gene abbreviation</b> | <b><i>Gerris buenoi</i></b> | <b><i>Oncopeltus fasciatus</i></b> | <b><i>Cimex lectularius</i></b> |
|-------------------------------------|--------------------------|-----------------------------|------------------------------------|---------------------------------|
| <b><i>abrupt</i></b>                | <i>ab</i>                | Yes                         | Yes                                | Yes                             |
| <b><i>Achaete-scute complex</i></b> | <i>ac</i>                | Yes                         | No                                 | No                              |
| <b><i>Actin 5C</i></b>              | <i>Act5C</i>             | Yes                         | Yes                                | Yes                             |
| <b><i>amphiphysin</i></b>           | <i>Amph</i>              | Yes                         | Yes                                | Yes                             |
| <b><i>aralar1</i></b>               | <i>aralar1</i>           | Yes                         | Yes                                | Yes                             |
| <b><i>arrow</i></b>                 | <i>arr</i>               | Yes                         | Yes                                | Yes                             |
| <b><i>Asense</i></b>                | <i>ase</i>               | No                          | Yes                                | No                              |
| <b><i>astray</i></b>                | <i>aay</i>               | Yes                         | Yes                                | Yes                             |
| <b><i>bantam</i></b>                | <i>ban</i>               | No                          | No                                 | No                              |
| <b><i>beadex</i></b>                | <i>Bx</i>                | Yes                         | Yes                                | Yes                             |
| <b><i>bendless</i></b>              | <i>ben</i>               | Yes                         | Yes                                | Yes                             |
| <b><i>bifocal</i></b>               | <i>bif</i>               | Yes                         | No                                 | No                              |
| <b><i>bonus</i></b>                 | <i>bon</i>               | Yes                         | No                                 | Yes                             |
| <b><i>buttonless</i></b>            | <i>btn</i>               | No                          | No                                 | No                              |



|                                    |                     |     |     |     |
|------------------------------------|---------------------|-----|-----|-----|
| <i>calreticulin</i>                | <i>Crc</i>          | Yes | Yes | Yes |
| <i>capricious</i>                  | <i>caps</i>         | Yes | Yes | Yes |
| <i>caupolican</i>                  | <i>caup</i>         | No  | Yes | Yes |
| <i>center divider</i>              | <i>cdi</i>          | Yes | Yes | Yes |
| <i>cornetto</i>                    | <i>corn</i>         | No  | Yes | No  |
| <i>corto</i>                       | <i>corto</i>        | No  | No  | No  |
| <i>couch potato</i>                | <i>cpo</i>          | Yes | Yes | Yes |
| <i>crooked legs</i>                | <i>crol</i>         | No  | Yes | Yes |
| <i>dacapo</i>                      | <i>dap</i>          | No  | Yes | No  |
| <i>dalmatian</i>                   | <i>dmt</i>          | No  | No  | No  |
| <i>Darkener of apricot</i>         | <i>Doa</i>          | No  | Yes | Yes |
| <i>daughterless</i>                | <i>da</i>           | Yes | Yes | No  |
| <i>deadpan</i>                     | <i>dpn</i>          | Yes | Yes | Yes |
| <i>Delta</i>                       | <i>DI</i>           | No  | Yes | Yes |
| <i>diminutive</i>                  | <i>dm</i>           | No  | No  | No  |
| <i>division abnormally delayed</i> | <i>dally</i>        | No  | Yes | Yes |
| <i>dorsotonals (homothorax)</i>    | <i>hth</i>          | No  | Yes | Yes |
| <i>E(spl) region transcript m7</i> | <i>E(spl)m7-HLH</i> | Yes | Yes | Yes |
| <i>E2F transcription factor</i>    | <i>E2f</i>          | Yes | Yes | Yes |
| <i>Eb1</i>                         | <i>Eb1</i>          | Yes | Yes | Yes |
| <i>effete</i>                      | <i>eff</i>          | Yes | No  | No  |
| <i>egghead</i>                     | <i>egh</i>          | Yes | Yes | Yes |
| <i>enabled</i>                     | <i>ena</i>          | Yes | Yes | Yes |
| <i>Enhancer-of-split</i>           | <i>E(spl)m8-HLH</i> | No  | Yes | Yes |
| <i>EP2237 (cabut)</i>              | <i>cbt</i>          | Yes | No  | Yes |
| <i>escargot</i>                    | <i>esg</i>          | Yes | No  | Yes |
| <i>extra macrochaetae</i>          | <i>emc</i>          | Yes | Yes | Yes |
| <i>flightless</i>                  | <i>flii</i>         | Yes | Yes | Yes |

|                                    |                  |     |     |     |
|------------------------------------|------------------|-----|-----|-----|
| <i>frizzled</i>                    | <i>fz</i>        | Yes | Yes | Yes |
| <i>frizzled 2</i>                  | <i>fz2</i>       | Yes | Yes | Yes |
| <i>ftz transcription factor 1</i>  | <i>ftz-f1</i>    | No  | Yes | Yes |
| <i>gliolectin</i>                  | <i>glec</i>      | No  | No  | No  |
| <i>gliotactin</i>                  | <i>Gli</i>       | No  | No  | Yes |
| <i>Glutathione S transferase 2</i> | <i>GstS1</i>     | Yes | Yes | Yes |
| <i>grapes</i>                      | <i>grp</i>       | Yes | Yes | Yes |
| <i>groucho</i>                     | <i>gro</i>       | Yes | Yes | Yes |
| <i>Hairless</i>                    | <i>H</i>         | Yes | Yes | Yes |
| <i>hairy</i>                       | <i>h</i>         | Yes | Yes | Yes |
| <i>headcase</i>                    | <i>hdc</i>       | Yes | Yes | Yes |
| <i>hephaestus</i>                  | <i>heph</i>      | Yes | Yes | Yes |
| <i>Hormone receptor-like in 39</i> | <i>Hr39</i>      | No  | Yes | Yes |
| <i>IGF-II mRNA-binding protein</i> | <i>Imp</i>       | Yes | Yes | Yes |
| <i>kekkon-1</i>                    | <i>kek1</i>      | Yes | Yes | Yes |
| <i>kuzbanian</i>                   | <i>kuz</i>       | Yes | Yes | Yes |
| <i>Laminin A</i>                   | <i>LanA</i>      | Yes | Yes | Yes |
| <i>lethal (1) G0007</i>            | <i>l(1)G0007</i> | Yes | Yes | Yes |
| <i>liquid facets</i>               | <i>lqf</i>       | Yes | Yes | Yes |
| <i>lola like</i>                   | <i>lolal</i>     | Yes | Yes | Yes |
| <i>longitudinals lacking</i>       | <i>lola</i>      | Yes | Yes | Yes |
| <i>melted</i>                      | <i>melt</i>      | Yes | Yes | Yes |
| <i>mushroom body defect</i>        | <i>mud</i>       | No  | No  | No  |
| <i>nebbish</i>                     | <i>neb</i>       | Yes | Yes | No  |
| <i>nejire</i>                      | <i>nej</i>       | Yes | Yes | Yes |
| <i>neuralized</i>                  | <i>neur</i>      | Yes | Yes | Yes |
| <i>notch</i>                       | <i>N</i>         | Yes | Yes | Yes |
| <i>nuclear fallout</i>             | <i>nuf</i>       | No  | No  | No  |

|                                         |               |     |     |     |
|-----------------------------------------|---------------|-----|-----|-----|
| <i>pavarotti</i>                        | <i>pav</i>    | Yes | Yes | Yes |
| <i>pebble</i>                           | <i>pbl</i>    | Yes | Yes | Yes |
| <i>pipsqueak</i>                        | <i>psq</i>    | Yes | Yes | Yes |
| <i>pointed</i>                          | <i>pnt</i>    | Yes | Yes | Yes |
| <b>Poly(ADP-ribose) glycohydrolase</b>  | <i>Parg</i>   | Yes | Yes | Yes |
| <i>polychaetoid</i>                     | <i>pyd</i>    | Yes | Yes | Yes |
| <i>prospero</i>                         | <i>pros</i>   | Yes | Yes | Yes |
| <b>Protein kinase 61C</b>               | <i>Pdk1</i>   | Yes | Yes | Yes |
| <b>Protein tyrosine phosphatase 10D</b> | <i>Ptp10D</i> | Yes | Yes | Yes |
| <i>pumilio</i>                          | <i>pum</i>    | Yes | Yes | Yes |
| <i>pxb</i>                              | <i>pxb</i>    | No  | No  | No  |
| <i>quemao</i>                           | <i>qm</i>     | Yes | Yes | Yes |
| <b>Ras oncogene at 85D</b>              | <i>Ras85D</i> | No  | Yes | Yes |
| <b>Ras-like protein A</b>               | <i>Rala</i>   | Yes | No  | No  |
| <i>raspberry</i>                        | <i>ras</i>    | Yes | Yes | Yes |
| <b>Rhomboid</b>                         | <i>rho</i>    | Yes | Yes | Yes |
| <b>Ribosomal protein S5</b>             | <i>RpS5a</i>  | Yes | Yes | Yes |
| <i>roundabout</i>                       | <i>robo</i>   | Yes | Yes | Yes |
| <i>rutabaga</i>                         | <i>rut</i>    | No  | Yes | Yes |
| <i>sanpodo</i>                          | <i>spdo</i>   | Yes | Yes | Yes |
| <i>scabrous</i>                         | <i>sca</i>    | Yes | Yes | Yes |
| <i>scalloped</i>                        | <i>sd</i>     | Yes | Yes | Yes |
| <i>scratch</i>                          | <i>scrt</i>   | Yes | Yes | No  |
| <i>scribbled</i>                        | <i>scrib</i>  | Yes | Yes | Yes |
| <i>scribbler</i>                        | <i>sbb</i>    | Yes | Yes | Yes |
| <i>scute</i>                            | <i>sc</i>     | No  | Yes | Yes |
| <i>seven up</i>                         | <i>svp</i>    | Yes | Yes | Yes |
| <i>shaggy</i>                           | <i>sgg</i>    | Yes | Yes | Yes |

|                                                     |                 |     |     |     |
|-----------------------------------------------------|-----------------|-----|-----|-----|
| <i>singed</i>                                       | <i>sn</i>       | Yes | Yes | Yes |
| <i>smooth</i>                                       | <i>sm</i>       | Yes | Yes | Yes |
| <i>Sp1</i>                                          | <i>Sp1</i>      | No  | Yes | No  |
| <i>SP71 (Trynity)</i>                               | <i>Tyn</i>      | Yes | Yes | Yes |
| <i>spitz</i>                                        | <i>spi</i>      | No  | No  | No  |
| <i>split ends</i>                                   | <i>spen</i>     | Yes | Yes | Yes |
| <i>string</i>                                       | <i>stg</i>      | Yes | Yes | Yes |
| <i>sugarless</i>                                    | <i>sgl</i>      | Yes | Yes | Yes |
| <i>taranis</i>                                      | <i>tara</i>     | Yes | Yes | Yes |
| <i>Tcp-1eta</i>                                     | <i>Tcp-1eta</i> | Yes | Yes | Yes |
| <i>Tollo</i>                                        | <i>Tollo</i>    | Yes | Yes | Yes |
| <i>tout-velu</i>                                    | <i>ttv</i>      | No  | Yes | Yes |
| <i>tramtrack</i>                                    | <i>ttk</i>      | Yes | Yes | Yes |
| <i>Trehalose receptor 1 (Trapped in endoderm 1)</i> | <i>Tre1</i>     | No  | Yes | No  |
| <i>tribbles</i>                                     | <i>trbl</i>     | Yes | Yes | Yes |
| <i>tweety</i>                                       | <i>tty</i>      | Yes | Yes | Yes |
| <i>Twin of m4</i>                                   | <i>Tom</i>      | No  | No  | No  |
| <i>u-turn (ventral veins lacking)</i>               | <i>wl</i>       | Yes | Yes | Yes |
| <i>Ubiquitin activating enzyme 1</i>                | <i>Uba1</i>     | Yes | Yes | Yes |
| <i>Ubiquitin conjugating enzyme 2</i>               | <i>UbcD2</i>    | Yes | Yes | No  |
| <i>Vacuolar H+ ATPase 16kD subunit</i>              | <i>Vha16-1</i>  | Yes | Yes | Yes |
| <i>β-amyloid protein precursor-like</i>             | <i>App1</i>     | Yes | Yes | Yes |

Supplementary Table 4 : Annotation of genes involved in bristle number and neural development

based on *Drosophila melanogaster* quantitative analyses<sup>191</sup>.

| Species                           | Order     | Suborder        | LWS | SWS-B | SWS-UV | Rh7 | Arthro<br>psin | c-Opsin |
|-----------------------------------|-----------|-----------------|-----|-------|--------|-----|----------------|---------|
| <i>Gerris buenoi</i>              | Hemiptera | Heteroptera     | 4   | -     | 1      | 1   | 1              | 1       |
| <i>Cimex<br/>lectularius</i>      | Hemiptera | Heteroptera     | 1   | -     | 1      | 1   | -              | 1       |
| <i>Rhodnius<br/>prolixus</i>      | Hemiptera | Heteroptera     | 1   | -     | 1      | 1   | -              | 1       |
| <i>Acyrtosiphon<br/>pisum</i>     | Hemiptera | Sternorrhyncha  | 1   | -     | 2      | 4   | 1              | 1       |
| <i>Megoura<br/>viciae</i>         | Hemiptera | Sternorrhyncha  | 1   | -     | 1      | na  | na             | na      |
| <i>Nephotettix<br/>cincticeps</i> | Hemiptera | Auchenorrhyncha | 1   | 1     | 1      | na  | na             | na      |

Supplementary Table 5 : Opsin conservation in Hemiptera. <sup>81,82,192-194</sup>

| Species                        | CPR_RR-1 | CPR_RR-2 | CPR_Uncl | CPAP1 | CPAP3 | CPF | TWDL | Total |
|--------------------------------|----------|----------|----------|-------|-------|-----|------|-------|
| <i>Drosophila melanogaster</i> | 61       | 42       | 34       | 29    | 10    | 5   | 29   | 210   |
| <i>Glossina morsitans</i>      | 33       | 27       | 17       | 11    | 6     | 1   | 9    | 104   |
| <i>Culex quinquefasciatus</i>  | 49       | 97       | 30       | 10    | 8     | 5   | 9    | 208   |
| <i>Aedes aegypti</i>           | 66       | 150      | 28       | 14    | 9     | 3   | 6    | 276   |
| <i>Anopheles gambiae</i>       | 43       | 103      | 21       | 13    | 10    | 4   | 12   | 206   |
| <i>Bombyx mori</i>             | 47       | 78       | 19       | 13    | 6     | 1   | 4    | 168   |
| <i>Danaus plexippus</i>        | 47       | 57       | 18       | 16    | 10    | 1   | 5    | 154   |
| <i>Apis mellifera</i>          | 13       | 15       | 10       | 15    | 7     | 4   | 2    | 66    |
| <i>Nasonia vitripennis</i>     | 19       | 32       | 18       | 16    | 6     | 5   | 2    | 98    |
| <i>Pediculus humanus</i>       | 9        | 15       | 17       | 12    | 6     | 0   | 2    | 61    |
| <i>Daphnia pulex</i>           | 101      | 36       | 152      | 20    | 12    | 0   | 0    | 321   |
| <i>Tetranychus urticae</i>     | 0        | 7        | 31       | 14    | 5     | 0   | 0    | 57    |
| <i>Tribolium castaneum</i>     | 34       | 55       | 21       | 13    | 7     | 5   | 3    | 138   |
| <i>Acyrtosiphon pisum</i>      | 9        | 84       | 20       | 10    | 8     | 2   | 3    | 136   |
| <i>Cimex lectularius</i>       | 18       | 70       | 32       | 15    | 6     | 5   | 3    | 149   |
| <i>Gerris buenoi</i>           | 22       | 74       | 30       | 10    | 6     | 3   | 10   | 155   |

Supplementary Table 6 : Detection and classification of putative structural cuticular proteins.

Information from other species than *Gerris buenoi* adapted from Ioannidou, et al. <sup>182</sup> and Benoit, et al. <sup>82</sup>.

|    | <b>Scaffold #</b> | <b># Genes</b> | <b>Family</b>     | <b>Length (Kbp)</b> | <b>Density<br/>(Kbp/gene)</b> |
|----|-------------------|----------------|-------------------|---------------------|-------------------------------|
| 1  | 431               | 14             | CPR RR-1/CPR Uncl | 398                 | 28.4                          |
| 2  | 32                | 13             | CPR RR-2          | 183                 | 14.1                          |
| 3  | 41                | 9              | CPR RR-2          | 92                  | 10.2                          |
| 4  | 349               | 8              | CPR RR-2          | 224                 | 27.9                          |
| 5  | 996               | 6              | CPR RR-2          | 73                  | 12.2                          |
| 6  | 683               | 4              | CPAP3             | 250                 | 62.5                          |
| 7  | 2496              | 4              | CPR RR-2/CPR Uncl | 92                  | 23.0                          |
| 8  | 46                | 3              | CPF               | 49                  | 16.2                          |
| 9  | 80                | 3              | TWDL              | 62                  | 20.6                          |
| 10 | 132               | 3              | CPR Uncl          | 249                 | 83.1                          |
| 11 | 706               | 3              | CPR Uncl          | 66                  | 21.9                          |

Supplementary Table 7 : Clusters of genes coding cuticle proteins in the genome of *Gerris buenoi*

952

953

|                                | <b>Ionotropic</b> | <b>Gustatory</b> | <b>Odorant</b> |
|--------------------------------|-------------------|------------------|----------------|
| <i>Gerris buenoi</i>           | 45/45             | 60/135           | 153/155        |
| <i>Oncopeltus fasciatus</i>    | 37/37             | 115/169          | 120/121        |
| <i>Rhodnius prolixus</i>       | 33/33             | 28/30            | 116/116        |
| <i>Cimex lectularius</i>       | 30/30             | 24/36            | 48/49          |
| <i>Drosophila melanogaster</i> | 65/65             | 60/68            | 60/62          |

Supplementary Table 8 : Numbers of genes and encoded proteins in three chemoreceptor families in heteropterans with genome sequences, and *Drosophila melanogaster* for comparison.

954

| Order     | Hemiptera            |                          |                           | Diptera                        | Hymenoptera           | Coleoptera                 | Lepidoptera        |
|-----------|----------------------|--------------------------|---------------------------|--------------------------------|-----------------------|----------------------------|--------------------|
| Species   | <i>Gerris buenoi</i> | <i>Rhodnius prolixus</i> | <i>Nilaparvata lugens</i> | <i>Drosophila melanogaster</i> | <i>Apis mellifera</i> | <i>Tribolium castaneum</i> | <i>Bombyx mori</i> |
| Clan 2    | 6                    | 5                        | 10                        | 6                              | 8                     | 8                          | 10                 |
| Clan 3    | 62                   | 50                       | 19                        | 36                             | 28                    | 70                         | 36                 |
| Clan 4    | 25                   | 27                       | 27                        | 32                             | 4                     | 44                         | 32                 |
| Clan mito | 10                   | 6                        | 12                        | 11                             | 6                     | 9                          | 8                  |
| Total     | 103                  | 88                       | 68                        | 85                             | 46                    | 131                        | 86                 |
| P450      |                      |                          |                           |                                |                       |                            |                    |

Supplementary Table 9: Numbers of cytochrome P450 genes annotated in some selected insect genomes and their distribution across P450 clans. Data are taken from <sup>108,109,195-197</sup>, and from a CYP450 database (<http://drnelson.uthsc.edu/CytochromeP450.html>).



| <b>Gene name</b> | <b>OGS name</b> | <b>Genomic scaffold</b> | <b>Length (aa)</b> | <b>Remark</b> |
|------------------|-----------------|-------------------------|--------------------|---------------|
| UGT-01           | GBUE014547-RA   | Scaffold1506            | 530                | complete      |
| UGT-02           | GBUE015333-RA   | Scaffold1907            | 515                | complete      |
| UGT-03           | GBUE018966-RA   | Scaffold3228            | 533                | complete      |
| UGT-04           | GBUE018967-RA   | Scaffold3228            | 515                | complete      |
| UGT-05           | GBUE018968-RA   | Scaffold3228            | 543                | complete      |
| UGT-06           | GBUE014164-RA   | Scaffold2126            | 524                | complete      |
| UGT-07           | GBUE014165-RA   | Scaffold2126            | 527                | complete      |
| UGT-08           | GBUE013499-RA-1 | Scaffold1323            | 529                | complete      |
| UGT-09           | GBUE013499-RA-2 | Scaffold1323            | 512                | complete      |
| UGT-10           | GBUE013499-RA-3 | Scaffold1323            | 527                | complete      |
| UGT-11           | GBUE013500-RA   | Scaffold1323            | 218                | partial       |
| UGT-12p*         | GBUE019125-RA   | Scaffold3054            | 470                | partial       |
| UGT-13           | GBUE010586-RA   | Scaffold838             | 524                | complete      |
| UGT-14           | GBUE012986-RA   | Scaffold1320            | 697                | complete      |
| UGT-15           | GBUE013062-RA   | Scaffold1042            | 437                | partial       |
| UGT-16           | GBUE020555-RA   | Scaffold5464            | 326                | partial       |
| UGT-17p          | GBUE020560-RA   | Scaffold6284            | 243                | partial       |
| UGT-18           | GBUE012772-RA   | Scaffold1549            | 422                | partial       |
| UGT-19           | GBUE012773-RA   | Scaffold1549            | 347                | partial       |
| UGT-20           | GBUE012774-RA   | Scaffold1549            | 434                | partial       |
| UGT-21           | GBUE012775-RA   | Scaffold1549            | 201                | partial       |
| UGT-22           | GBUE012776-RA   | Scaffold1549            | 378                | partial       |

|        |               |              |     |          |
|--------|---------------|--------------|-----|----------|
| UGT-23 | GBUE012777-RA | Scaffold1549 | 522 | complete |
| UGT-24 | GBUE012778-RA | Scaffold1549 | 540 | complete |
| UGT-25 | GBUE012779-RA | Scaffold1549 | 519 | complete |
| UGT-26 | GBUE012780-RA | Scaffold1549 | 534 | complete |
| UGT-27 | GBUE012781-RA | Scaffold1549 | 529 | complete |
| UGT-28 | no OGS name   | Scaffold4983 | 235 | partial  |

Supplementary Table 10 : List of UDP-glycosyltransferase genes in *Gerris buenoi* genome. (\*refers to pseudogene.)

| Gene type  | Gene name            | Location [Accession#]                                                             | Protein Length | Domains          |
|------------|----------------------|-----------------------------------------------------------------------------------|----------------|------------------|
| <b>Gap</b> | <i>orthodenticle</i> | Scaffold177:468498-481641 +<br>strand<br>GbueTmpM005873-RA                        | 542            | zinc finger C2H2 |
|            | <i>buttonhead</i>    | Scaffold1076:201924-220125 +<br>strand<br>GbueTmpM009254-RA                       | 437            | zinc finger M2C2 |
|            | <i>collier</i>       | Scaffold128:650434 - 661155 +<br>strand<br>GbueTmpM003852-RA<br>GbueTmpM003853-RA | 236            | IPT Superfamily  |

|  |                            |                                                                                                      |     |                         |
|--|----------------------------|------------------------------------------------------------------------------------------------------|-----|-------------------------|
|  | <i>cap-n-collar</i>        | Scaffold1737:125742 - 180215 +<br>strand<br>GbueTmpA013482-RA                                        | 414 | bZIP Superfamily        |
|  | <i>crocodile</i>           | Scaffold417:94048 -94890 –<br>strand<br>GbueTmpA005876-RA                                            | 280 | Forkhead<br>Superfamily |
|  | <i>Krüppel</i>             | Scaffold66:273659 - 274706 +<br>strand<br>GbueTmpA001375-RA                                          | 246 | zinc finger M2C2        |
|  | <i>huckebein</i>           | Scaffold1050:35145-36625 +<br>strand<br>GbueTmpA011673-RA                                            | 153 | zinc finger C2H2        |
|  | <i>empty<br/>spiracles</i> | Scaffol640:42899 - 108829 +<br>strand<br>GbueTmpA010166-RA<br>GbueTmpA010167-RA<br>GbueTmpA010168-RA | 237 | Homeobox<br>Superfamily |
|  | <i>giant</i>               | Scaffold1313:205754 - 259477 –<br>strand<br>GbueTmpM012482-RA                                        | 290 | bZIP Superfamily        |
|  | <i>gomdanji</i>            | Scaffold177:546605-551844 +<br>strand<br>GbueTmpM005874-RA                                           | 101 | meth_res<br>Superfamily |

|                             |                             |                                                            |      |                                   |
|-----------------------------|-----------------------------|------------------------------------------------------------|------|-----------------------------------|
| <b>Segment<br/>polarity</b> | <i>shifted</i>              | Scaffold4383:9065-11975 +<br>strand                        | 268  | WIF Superfamily                   |
|                             | <i>roadkill</i>             | Scaffold7:1346380-1347546 +<br>strand                      | 388  | MATH<br>superfamily<br>BTB Domain |
|                             | <i>perli-like</i>           | Scaffold542:114112-120587 –<br>strand<br>GbueTmpM009219-RA | 214  | Perli Domain                      |
|                             | <i>microtubule<br/>star</i> | Scaffold83:875664-876641 +<br>strand                       | 325  | MPP Superfamily                   |
|                             | <i>flapwing</i>             | Scaffold362:255357-260899 -<br>strand                      | 240  | MPP Superfamily                   |
|                             | <i>cullin1</i>              | Scaffold15:198529-200865 -<br>strand                       | 778  | Cullin<br>Superfamily             |
|                             | <i>dispatched</i>           | Scaffold2487:39972-52586 -<br>strand                       | 434  | ND                                |
|                             | <i>costa</i>                | Scaffold666:175038-178490 +<br>strand                      | 1150 | Kinesin Domain                    |
|                             | <i>paxillin</i>             | Scaffold927:228836-245479 -<br>strand                      | 300  | LIM Superfamily                   |

|                                |                                |                                                            |      |                                            |
|--------------------------------|--------------------------------|------------------------------------------------------------|------|--------------------------------------------|
| <b>Terminal<br/>patterning</b> | <i>Torso</i>                   | Scaffold626:104429-114052 +<br>strand<br>GbueTmpA010687-RA | 412  | PKc_like<br>superfamily<br>FN3 superfamily |
|                                | <i>Torso-like</i>              | Scaffold7:1642089-1661652 +<br>strand                      | 356  | MACPF<br>Superfamily                       |
| <b>General</b>                 | <i>decapentaple<br/>gic</i>    | Scaffold488:247243-262588 –<br>strand<br>GbueTmpA009289-RA | 323  | TGF-Beta Domain                            |
|                                | <i>cubitus<br/>interruptus</i> | Scaffold2762:18072-42310 –<br>strand<br>GbueTmpA017830-RA  | 960  | zinc finger-H                              |
|                                | <i>lipophorin-like</i>         | Scaffold940:71827-78984 +<br>strand<br>GbueTmp8010317-RA   | 1202 | DUF1943<br>Superfamily                     |

Supplementary Table 11 : Current Early Developmental Genes identified in the *Gerris buenoi* genome. The table lists Gap Genes and Segment Polarity Genes models, model location and accession number, protein length, and protein domain identified in the model.

| <b><i>Gerris buenoi</i> early patterning genes</b> |     |
|----------------------------------------------------|-----|
| <b>Gap Genes</b>                                   |     |
| <i>caudal</i>                                      | ?   |
| <i>hunchback</i>                                   | Yes |
| <i>orthodenticle</i>                               | Yes |
| <i>buttonhead</i>                                  | Yes |
| <i>collier</i>                                     | Yes |
| <i>cap-n-collar</i>                                | Yes |
| <i>crocodile</i>                                   | Yes |
| <i>Krüppel</i>                                     | Yes |
| <i>huckebein</i>                                   | Yes |
| <i>sloppy-paired</i>                               | Yes |
| <i>empty spiracles</i>                             | Yes |
| <i>giant</i>                                       | Yes |
| <i>knirps</i>                                      | Yes |
| <i>tailless</i>                                    | Yes |
| <i>gomdanji</i>                                    | Yes |
| <b>Pair Rule Genes</b>                             |     |

|                                  |     |
|----------------------------------|-----|
| <i>even-skipped</i>              | Yes |
| <i>paired</i>                    | Yes |
| <i>odd-skipped</i>               | Yes |
| <i>paired</i>                    | Yes |
| <i>runt</i>                      | Yes |
| <i>hairy</i>                     | Yes |
| <i>Tenascin major</i>            | Yes |
| <i>sister-of-odd-and-bowl</i>    | Yes |
| <b>Segment Polarity Genes</b>    |     |
| <i>engrailed</i>                 | Yes |
| <i>invected</i>                  | Yes |
| <i>shifted</i>                   | Yes |
| <i>roadkill</i>                  | Yes |
| <i>peril-like</i>                | Yes |
| <i>patched</i>                   | Yes |
| <i>nejire</i>                    | Yes |
| <i>microtubule star</i>          | Yes |
| <i>flapwing</i>                  | Yes |
| <i>cullin1</i>                   | Yes |
| <i>dispatched</i>                | Yes |
| <i>costa</i>                     | Yes |
| <i>paxillin</i>                  | Yes |
| <b>Terminal Patterning Genes</b> |     |
| <i>torso</i>                     | Yes |
| <i>PTTH</i>                      | ?   |
| <i>torso-like</i>                | Yes |
| <i>trunk</i>                     | No  |

Supplementary Table 12 : Presence/absence of *Drosophila melanogaster* early patterning genes in

the genomes of *Gerris buenoi*.



| Gene type               | Gene name               | <i>Drosophila melanogaster</i> |           | <i>Tribolium castaneum</i> |           |
|-------------------------|-------------------------|--------------------------------|-----------|----------------------------|-----------|
|                         |                         | QC (ID)                        | Bit Score | QC (ID)                    | Bit Score |
| <b>Gap</b>              | <i>orthodenticle</i>    | 24% (98%)                      | 94        | 42% (71%)                  | 97        |
|                         | <i>buttonhead</i>       | 26% (61%)                      | 145       | 29% (70%)                  | 187       |
|                         | <i>collier</i>          | 43% (70%)                      | 94        | 47% (62%)                  | 90        |
|                         | <i>cap-n-collar</i>     | 19% (43%)                      | 47        | 56% (34%)                  | 116       |
|                         | <i>crocodile</i>        | 81% (52%)                      | 234       | 39% (65%)                  | 166       |
|                         | <i>Krüppel</i>          | 70% (71%)                      | 242       | 77% (59%)                  | 240       |
|                         | <i>huckebein</i>        | 71% (68%)                      | 174       | ND                         | ND        |
|                         | <i>empty spiracles</i>  | 86% (71%)                      | 179       | 90% (60%)                  | 281       |
|                         | <i>giant</i>            | 33% (62%)                      | 77        | 40% (48%)                  | 117       |
|                         | <i>gomdANJI</i>         | 64% (34%)                      | 45        | ND                         | ND        |
| <b>Segment polarity</b> | <i>shifted</i>          | 95% (55%)                      | 286       | 92% (68%)                  | 350       |
|                         | <i>roadkill</i>         | 96% (56%)                      | 424       | 96% (57%)                  | 437       |
|                         | <i>peril-like</i>       | 77% (56%)                      | 194       | 96% (61%)                  | 262       |
|                         | <i>microtubule star</i> | 84% (50%)                      | 295       | ND                         | ND        |
|                         | <i>flapwing</i>         | 87% (42%)                      | 184       | ND                         | ND        |
|                         | <i>cullin1</i>          | 99% (61%)                      | 956       | 100% (79%)                 | 1274      |
|                         | <i>dispatched</i>       | 98% (25%)                      | 181       | 96% (31%)                  | 181       |
|                         | <i>costa</i>            | 72% (36%)                      | 227       | 70% (27%)                  | 159       |
|                         | <i>paxillin</i>         | 89% (65%)                      | 367       | 81% (66%)                  | 330       |

|                                |                        |           |     |           |     |
|--------------------------------|------------------------|-----------|-----|-----------|-----|
| <b>Terminal<br/>patterning</b> | <i>Torso</i>           | 93% (53%) | 140 | 92% (31%) | 194 |
|                                | <i>Torso-like</i>      | 90% (46%) | 321 | 89% (49%) | 335 |
| <b>General</b>                 | <i>decapentaplegic</i> | 55% (34%) | 173 | 58% (39%) | 295 |
|                                | <i>cubitus</i>         | 94% (46%) | 301 | 98% (42%) | 280 |
|                                | <i>interruptus</i>     |           |     |           |     |
|                                | <i>lipophorin-like</i> | 77% (23%) | 215 | 95% (33%) | 587 |

Supplementary Table 13 : Represents Query Coverage (Identity) and E-value of the annotated gene models pairwise aligned to orthologues in other species. Pairwise alignment was performed using NCBI blast. ND – Not Determined.

| Gene                                                     | Scaffold: start..end            | Locus length (nt)   | Protein length (aa) | Number of CDS exons |
|----------------------------------------------------------|---------------------------------|---------------------|---------------------|---------------------|
| <i>axin</i>                                              | Scaffold136:602832..659508      | 56 677              | 1496                | 16                  |
| <i>armadillo*</i>                                        | Scaffold2236:76533..96972       | 20 440<br>(partial) | 716<br>(partial)    | 11                  |
| <i>arrow</i>                                             | Scaffold136:139587..222403      | 82 817              | 1490                | 24                  |
| <i>dishevelled -RA</i>                                   | Scaffold441:78333..107479       | 29 147              | 602                 | 15                  |
| <i>dishevelled -RB</i>                                   | Scaffold441:78333..124793       | 46 461              | 597                 | 14                  |
| <i>frizzled</i>                                          | Scaffold288:270554..271759      | 1 206               | 401                 | 1                   |
| <i>frizzled-2</i>                                        | Scaffold1053:141773..14578<br>1 | 4 009               | 597                 | 1                   |
| <i>frizzled-3</i>                                        | Scaffold304:383672..482292      | 98 621              | 500                 | 2                   |
| <i>glycogen synthase kinase-3 beta -RA -part 1 of 2*</i> | Scaffold1391:148463..17482<br>2 | 26 360<br>(partial) | 302<br>(partial)    | 6                   |
| <i>glycogen synthase kinase-3 beta -RB -part 1 of 2*</i> | Scaffold1391:148463..17482<br>2 | 26 360<br>(partial) | 286<br>(partial)    | 6                   |
| <i>glycogen synthase kinase-3 beta -part 2 of</i>        | Scaffold10229:2..3044           | 3 043<br>(partial)  | 150<br>(partial)    | 2                   |

|                 |                            |                    |                  |    |
|-----------------|----------------------------|--------------------|------------------|----|
| 2*              |                            |                    |                  |    |
| <i>wingless</i> | Scaffold2771:12925..70979  | 58 055             | 331              | 3  |
| <i>Wnt7</i>     | Scaffold163:273675..338565 | 64 891             | 456              | 10 |
| <i>Wnt8</i>     | Scaffold1136:57077..65015  | 7 939              | 302              | 5  |
| <i>Wnt5</i>     | Scaffold3063:28070..66680  | 38 611             | 321              | 6  |
| <i>Wnt10</i>    | Scaffold2796:27374..49167  | 21 794             | 273              | 5  |
| <i>WntA*</i>    | Scaffold20: 632685..638039 | 5 355<br>(partial) | 287<br>(partial) | 5  |
| <i>wntless</i>  | Scaffold190:240723..250315 | 9 593              | 538              | 11 |

Supplementary Table 14 : Positional information for the 18 Wnt signaling genes annotated.

Incomplete gene models are marked with an asterisk (\*).

| <b>Gene set</b>    | <b>Gene name</b>                         | <b><i>Gerris buenoi</i><br/>CpG<sub>O/E</sub> value</b> | <b><i>Rhodnius proxilus</i><br/>CpG<sub>O/E</sub> value</b> |
|--------------------|------------------------------------------|---------------------------------------------------------|-------------------------------------------------------------|
| Insulin signalling | <i>Chico</i>                             | 0.658374618                                             |                                                             |
| Insulin signalling | <i>forkhead box protein O</i>            |                                                         |                                                             |
| Insulin signalling | <i>Foxo</i>                              | 1.014152563                                             | 0.963514594                                                 |
| Insulin signalling | <i>Insulin receptor 1</i>                | 1.090538511                                             | 1.133882478                                                 |
| Insulin signalling | <i>Insulin receptor 1-like</i>           | 0.865210624                                             |                                                             |
| Insulin signalling | <i>Insulin receptor 2</i>                | 0.394382326                                             | 0.781348977                                                 |
| Insulin signalling | <i>Insulin receptor substrate</i>        |                                                         |                                                             |
| Insulin signalling | <i>Phosphatase and tensine homologue</i> | 0.444946289                                             |                                                             |
| Insulin signalling | <i>Phosphoinositide 3-kinase Pi3K21B</i> | 0.730078776                                             | 0.783423219                                                 |
| Insulin signalling | <i>Phosphoinositide 3-kinase Pi3K92E</i> | 0.438681484                                             | 0.575389176                                                 |
| Insulin            | <i>Protein Kinase B</i>                  | 0.395861448                                             | 0.563182964                                                 |

|                       |                                               |             |             |
|-----------------------|-----------------------------------------------|-------------|-------------|
| signalling            |                                               |             |             |
| Insulin<br>signalling | <i>Rheb/Ras homolog enriched<br/>in brain</i> | 0.540547798 |             |
| Insulin<br>signalling | <i>RPS6-p70-protein kinase</i>                | 0.731629717 | 0.704464786 |
| Insulin<br>signalling | <i>Slimfast</i>                               | 0.77679356  | 0.7171875   |
| Insulin<br>signalling | <i>Target of rapamycin</i>                    | 0.648267284 | 0.641665967 |
| Insulin<br>signalling | <i>Thor</i>                                   | 0.910084034 | 0.907818533 |
| Insulin<br>signalling | <i>Tsc1 Tuberous sclerosis<br/>complex 1</i>  | 0.383532463 | 0.517120208 |
| Insulin<br>signalling | <i>Tsc2/gigas/Tuberin</i>                     | 0.580956324 | 0.815878378 |
| Juvenile<br>Hormone   | <i>Allostatin C</i>                           |             |             |
| Juvenile<br>Hormone   | <i>broad</i>                                  | 0.905797101 | 0.973075749 |
| Juvenile<br>Hormone   | <i>Chd64</i>                                  |             |             |
| Juvenile<br>Hormone   | <i>FK506-binding protein 1</i>                | 0.480397835 | 0.498673415 |

|                     |                                                |             |             |
|---------------------|------------------------------------------------|-------------|-------------|
| Juvenile<br>Hormone | <i>FK506-binding protein 14 ortholog</i>       |             |             |
| Juvenile<br>Hormone | <i>FK506-binding protein FKBP59</i>            | 0.553441364 | 0.759341109 |
| Juvenile<br>Hormone | <i>Juvenile hormone acid methyltransferase</i> | 0.853085106 | 0.627682228 |
| Juvenile<br>Hormone | <i>Juvenile hormone epoxide hydrolase 1</i>    | 0.497504096 | 0.823006391 |
| Juvenile<br>Hormone | <i>Juvenile hormone esterase</i>               |             |             |
| Juvenile<br>Hormone | <i>Juvenile hormone esterase duplication</i>   |             |             |
| Juvenile<br>Hormone | <i>Juvenile hormone-inducible protein 1</i>    | 0.437671182 | 0.579799692 |
| Juvenile<br>Hormone | <i>Juvenile hormone-inducible protein 26</i>   | 0.90600823  | 0.302261307 |
| Juvenile<br>Hormone | <i>Kruppel homolog 1</i>                       | 0.883615819 | 1.019771301 |
| Juvenile<br>Hormone | <i>Methoprene-tolerant</i>                     | 0.633364098 | 0.59144385  |
| Juvenile<br>Hormone | <i>taiman</i>                                  |             |             |
| Reproduction        | <i>Armitage</i>                                | 0.900408271 | 0.735040693 |

|              |                                            |             |             |
|--------------|--------------------------------------------|-------------|-------------|
| Reproduction | <i>Aubergine (annotated as Piwi-like)</i>  | 0.497755107 |             |
| Reproduction | <i>Bazooka/PAR-3</i>                       |             | 0.68762606  |
| Reproduction | <i>cappuccino</i>                          |             |             |
| Reproduction | <i>capsuleen</i>                           |             |             |
| Reproduction | <i>Dynein light chain 90F</i>              | 1.006892418 | 0.784722222 |
| Reproduction | <i>eIF5B</i>                               | 0.66963049  | 0.699717583 |
| Reproduction | <i>Heat shock protein 83/90</i>            | 0.661795474 | 0.78564613  |
| Reproduction | <i>Heat shock protein 83/90 2</i>          |             | 0.558785904 |
| Reproduction | <i>Hunchback</i>                           | 1.00601711  | 0.902307812 |
| Reproduction | <i>Laminin A</i>                           |             |             |
| Reproduction | <i>Laminin B2</i>                          |             |             |
| Reproduction | <i>loki/Chk2</i>                           |             |             |
| Reproduction | <i>maelstrom</i>                           |             |             |
| Reproduction | <i>meiotic 41/ATR</i>                      | 0.318670549 |             |
| Reproduction | <i>Merlin</i>                              |             |             |
| Reproduction | <i>Moesin</i>                              |             |             |
| Reproduction | <i>nanos</i>                               | 0.392635135 |             |
| Reproduction | <i>N-ethylmaleimide-sensitive factor 2</i> |             |             |
| Reproduction | <i>Par - 6</i>                             | 0.493019601 | 0.75739645  |
| Reproduction | <i>Par-1</i>                               |             |             |
| Reproduction | <i>pebble/ECT2</i>                         | 0.346433041 | 0.556323529 |



|              |                                      |             |             |
|--------------|--------------------------------------|-------------|-------------|
| Reproduction | <i>Piwi (annotated as piwi-like)</i> |             |             |
| Reproduction | <i>Rab11</i>                         | 1.21100186  | 0.891789661 |
| Reproduction | <i>sevenless</i>                     |             |             |
| Reproduction | <i>Smaug</i>                         |             | 0.374331551 |
| Reproduction | <i>Spindle-D</i>                     |             |             |
| Reproduction | <i>Spindle-E</i>                     |             |             |
| Reproduction | <i>staufen</i>                       | 0.335958039 | 0.63898769  |
| Reproduction | <i>Stellate</i>                      |             |             |
| Reproduction | <i>telomere fusion</i>               |             |             |
| Reproduction | <i>tudor</i>                         | 1.249130153 | 0.799734986 |
| Reproduction | <i>vasa</i>                          | 0.693071093 |             |
| Wing         | <i>Acetylcholine esterase</i>        | 1.056863669 | 0.931578947 |
| Wing         | <i>apterous</i>                      |             |             |
| Wing         | <i>argos</i>                         |             |             |
| Wing         | <i>armadillo</i>                     | 0.404645677 | 0.517999969 |
| Wing         | <i>baboon</i>                        | 0.516144578 | 0.667751211 |
| Wing         | <i>basket</i>                        | 0.740959251 | 0.7426405   |
| Wing         | <i>bifid</i>                         |             |             |
| Wing         | <i>blistered</i>                     |             |             |
| Wing         | <i>brinker</i>                       | 0.876838162 | 0.574162679 |
| Wing         | <i>Buffy</i>                         | 0.602699055 |             |
| Wing         | <i>capricious</i>                    | 0.914409241 | 0.819466248 |
| Wing         | <i>clot</i>                          | 0.872160934 | 1.03902439  |

|      |                                                  |             |             |
|------|--------------------------------------------------|-------------|-------------|
| Wing | <i>cut</i>                                       | 0.362195409 | 0.754880803 |
| Wing | <i>Death regulator Nedd2-like caspase</i>        | 1.146718147 |             |
| Wing | <i>Death related ICE-like caspase</i>            | 0.6890625   | 0.804121212 |
| Wing | <i>Death-associated inhibitor of apoptosis 1</i> |             |             |
| Wing | <i>Decapping protein 1</i>                       | 1.189357953 | 0.711444547 |
| Wing | <i>division abnormally delayed</i>               | 0.535155846 | 0.513011152 |
| Wing | <i>eiger</i>                                     | 0.838224085 | 0.839430894 |
| Wing | <i>engrailed</i>                                 | 1.247013856 | 0.814175728 |
| Wing | <i>Epidermal growth factor receptor</i>          | 0.697416093 | 0.659715546 |
| Wing | <i>fringe</i>                                    | 1.294816794 | 0.638368984 |
| Wing | <i>hedgehog</i>                                  | 0.964415584 | 0.773176471 |
| Wing | <i>Keren</i>                                     | 0.754096776 |             |
| Wing | <i>Mad1</i>                                      | 0.517751479 |             |
| Wing | <i>Mad2</i>                                      | 0.414863782 | 0.499577603 |
| Wing | <i>Mad3</i>                                      | 0.440286166 | 0.555261005 |
| Wing | <i>mastermind</i>                                | 0.516834008 | 0.690080382 |
| Wing | <i>Medea</i>                                     | 0.497130418 | 0.534404253 |
| Wing | <i>mind bomb 1</i>                               | 0.533591731 | 0.771083019 |
| Wing | <i>nemo</i>                                      | 1.09630137  | 0.58400637  |

|      |                               |             |             |
|------|-------------------------------|-------------|-------------|
| Wing | <i>Nipped-A</i>               |             |             |
| Wing | <i>patched</i>                | 0.475015567 | 0.732220161 |
| Wing | <i>punt</i>                   | 0.990559836 | 0.428825279 |
| Wing | <i>punt 2</i>                 | 0.451908397 |             |
| Wing | <i>Ras oncogene at 85D</i>    | 1.040664452 | 0.743847875 |
| Wing | <i>saxophone</i>              | 0.949921557 |             |
| Wing | <i>schnurri</i>               | 0.347452969 |             |
| Wing | <i>Serrate</i>                |             |             |
| Wing | <i>smoothened</i>             | 0.431910569 |             |
| Wing | <i>spalt major</i>            | 0.925619236 | 0.699655862 |
| Wing | <i>Star</i>                   | 0.658335154 |             |
| Wing | <i>Suppressor of Hairless</i> | 0.542231327 | 0.624452765 |
| Wing | <i>tartan</i>                 | 0.732986444 | 1.144366197 |
| Wing | <i>thickveins</i>             | 0.586962236 |             |
| Wing | <i>wingless</i>               | 1.124115983 | 1.017095821 |

Supplementary Table 15 : List of genes in the networks underlying wing polyphenism, reproduction, juvenile hormone, and insulin signalling included in the analysis and their CpG<sub>O/E</sub> value for *Gerris buenoi* and *Rhodnius prolixus*. Genes that were annotated in *Gerris buenoi* but excluded from the analysis because they did not have a complete coding sequence are also listed but without a CpG<sub>O/E</sub> value.

## Core histones

|                             | H1        | H2A       | H2B      | H3        | H4       |
|-----------------------------|-----------|-----------|----------|-----------|----------|
| <i>Aedes aegypti</i>        | 6         | 19        | 11       | 18        | 15       |
| <i>Apis mellifera</i>       | 2         | 6         | 5        | 6         | 4        |
| <i>Acyrtosiphon pisum</i>   | 6         | 5         | 5        | 7         | 5        |
| <i>Oncopeltus fasciatus</i> | 1         | 3         | 4        | 3         | 2        |
| <i>Cimex lectularius</i>    | 4         | 14        | 6        | 13        | 8        |
| <b><i>Gerris buenoi</i></b> | <b>10</b> | <b>11</b> | <b>9</b> | <b>10</b> | <b>9</b> |
| <i>Daphnia pulex</i>        | 5         | 10        | 12       | 10        | 6        |
| <i>Tetranychus urticae</i>  | 1         | 4         | 7        | 6         | 3        |
| <i>Ixodes scapularis</i>    | 4         | 6         | 4        | 4         | 1        |
| <i>Strigamia maritima</i>   | 3         | 7         | 15       | 4         | 4        |

Supplementary Table 16 : Number of loci within the genomes of arthropod species encoding the five classes of histones. Orthologs for *Aedes aegypti*, *Daphnia pulex*, *Tetranychus urticae* and *Ixodes scapularis* were obtained by BLAST analysis. Orthologs for *Apis mellifera* and *Acyrtosiphon pisum* were obtained from published literature <sup>163,198</sup>. Orthologs for *Oncopeltus fasciatus* (manuscript in preparation) and *Cimex lectularius* <sup>82</sup> were obtained during genome annotation.

957

| Species                   | Number of antioxidant genes |
|---------------------------|-----------------------------|
| <i>Acyrtosiphon pisum</i> | 6                           |
| <i>Apis mellifera</i>     | 1                           |
| <i>Bombyx mori</i>        | 2                           |
| <i>Cimex lectularis</i>   | 16                          |

|                                |   |
|--------------------------------|---|
| <i>Drosophila melanogaster</i> | 0 |
| <i>Pediculus humanus</i>       | 0 |
| <i>Tribolium castaneum</i>     | 5 |

Supplementary Table 17 : Number of genes for each species compared to that had highest similarity to *G. Buenoii* antioxidant genes.

|                        |                                       |                                                                                                                                              |
|------------------------|---------------------------------------|----------------------------------------------------------------------------------------------------------------------------------------------|
| <b>Bio Projects</b>    | i5K Pilot NCBI Bio-project            | PRJNA163973<br><a href="https://www.ncbi.nlm.nih.gov/bioproject/163973">https://www.ncbi.nlm.nih.gov/bioproject/163973</a>                   |
|                        | <i>Gerris buenoi</i> NCBI Bio-project | PRJNA203045<br><a href="https://www.ncbi.nlm.nih.gov/bioproject/203045">https://www.ncbi.nlm.nih.gov/bioproject/203045</a>                   |
|                        | NCBI Bio-sample                       | SAMN02800617<br><a href="https://www.ncbi.nlm.nih.gov/biosample/2800617">https://www.ncbi.nlm.nih.gov/biosample/2800617</a>                  |
| <b>Genome Sequence</b> | 180bp insert <i>male</i> DNA          | 1 Illumina HiSeq 2000 run: 122.1M read pairs, 24.7Gbp                                                                                        |
|                        | 500bp insert <i>male</i> DNA          | 1 Illumina HiSeq 2500 run: 36.4M read pairs, 7.4Gbp                                                                                          |
|                        | 3kb insert <i>male</i> DNA            | 1 Illumina HiSeq 2000 run: 137.4M read pairs, 27.8 Gbp                                                                                       |
|                        | 8kb insert <i>female</i> DNA          | 1 Illumina HiSeq 2000 run: 135.9M read pairs, 27.4 Gbp                                                                                       |
|                        | 180bp insert NCBI SRA Accession       | SRX493944<br><a href="https://www.ncbi.nlm.nih.gov/sra/SRX493944">https://www.ncbi.nlm.nih.gov/sra/SRX493944</a>                             |
|                        | 500bp insert NCBI SRA Accession       | SRX493946<br><a href="https://www.ncbi.nlm.nih.gov/sra/SRX493946">https://www.ncbi.nlm.nih.gov/sra/SRX493946</a>                             |
|                        | 3kb insert NCBI SRA Accession         | SRX493945<br><a href="https://www.ncbi.nlm.nih.gov/sra/SRX493945">https://www.ncbi.nlm.nih.gov/sra/SRX493945</a>                             |
|                        | 8kb insert NCBI SRA Accession         | SRX493943<br><a href="https://www.ncbi.nlm.nih.gov/sra/SRX493943">https://www.ncbi.nlm.nih.gov/sra/SRX493943</a>                             |
| <b>Genome Assembly</b> | Number of contigs                     | 304,893                                                                                                                                      |
|                        | Contig N50                            | 3,812 bp                                                                                                                                     |
|                        | Number of scaffolds                   | 20,259                                                                                                                                       |
|                        | Scaffold N50                          | 344,118 bp                                                                                                                                   |
|                        | Size of final assembly                | 1,000,161,732 bp                                                                                                                             |
|                        | Size of final assembly - without gaps | 653,297,297 bp                                                                                                                               |
|                        | NCBI Genome Assembly Accession        | GCA_001010745.1<br><a href="https://www.ncbi.nlm.nih.gov/assembly/GCA_001010745.1">https://www.ncbi.nlm.nih.gov/assembly/GCA_001010745.1</a> |
| <b>RNAseq data</b>     | <i>Gerris buenoi</i>                  | PRJNA275657                                                                                                                                  |
|                        | Transcriptome Bio-project             | <a href="https://www.ncbi.nlm.nih.gov/bioproject/275657">https://www.ncbi.nlm.nih.gov/bioproject/275657</a>                                  |
|                        | Mixed sex embryos and nymphs          | 32M read pairs, 6.5 Gbp                                                                                                                      |

|                                                         |                                                                                                     |                                                                                                                              |
|---------------------------------------------------------|-----------------------------------------------------------------------------------------------------|------------------------------------------------------------------------------------------------------------------------------|
| <b>RNAseq reads</b>                                     |                                                                                                     |                                                                                                                              |
| Mixed sex embryos and nymphs SRA                        | SRX896710                                                                                           |                                                                                                                              |
| Accession                                               | <a href="https://www.ncbi.nlm.nih.gov/sra/SRX896710">https://www.ncbi.nlm.nih.gov/sra/SRX896710</a> |                                                                                                                              |
| <hr/>                                                   |                                                                                                     |                                                                                                                              |
| <b>Automated Genome<br/>Annotation<br/>(Gbue_0.5.3)</b> | Genes (Gbue_0.5.3)                                                                                  | 20 949                                                                                                                       |
|                                                         | Average Transcript length                                                                           | 1 298                                                                                                                        |
|                                                         | Average CDS length                                                                                  | 954 bp (318 aa)                                                                                                              |
|                                                         | Exons per gene                                                                                      | 4.81                                                                                                                         |
|                                                         | Genome Annotation Link                                                                              | National Agricultural Library<br><a href="https://i5k.nal.usda.gov/Gerris_buenoi">https://i5k.nal.usda.gov/Gerris_buenoi</a> |

Supplementary Table 18 : Sequencing, assembly, annotation statistics and accession numbers

959

960

961

962

963 **References**

964

- 965 1 Kongton, K., McCall, K. & Phongdara, A. Identification of gamma-interferon-inducible lysosomal thiol  
 966 reductase (GILT) homologues in the fruit fly *Drosophila melanogaster*. *Developmental and comparative*  
 967 *immunology* **44**, 389-396, doi:10.1016/j.dci.2014.01.007 (2014).
- 968 2 De Gregorio, E., Spellman, P. T., Tzou, P., Rubin, G. M. & Lemaitre, B. The Toll and Imd pathways are the  
 969 major regulators of the immune response in *Drosophila*. *The EMBO journal* **21**, 2568-2579,  
 970 doi:10.1093/emboj/21.11.2568 (2002).
- 971 3 Zou, Z. *et al.* Comparative genomic analysis of the *Tribolium* immune system. *Genome biology* **8**, R177,  
 972 doi:10.1186/gb-2007-8-8-r177 (2007).
- 973 4 Chipman, A. D. *et al.* The first myriapod genome sequence reveals conservative arthropod gene content and  
 974 genome organisation in the centipede *Strigamia maritima*. *PLoS biology* **12**, e1002005,  
 975 doi:10.1371/journal.pbio.1002005 (2014).
- 976 5 Hoffmann, J. A. & Reichhart, J. M. *Drosophila* innate immunity: an evolutionary perspective. *Nature*  
 977 *immunology* **3**, 121-126, doi:10.1038/ni0202-121 (2002).
- 978 6 Tzou, P., De Gregorio, E. & Lemaitre, B. How *Drosophila* combats microbial infection: a model to study  
 979 innate immunity and host-pathogen interactions. *Curr Opin Microbiol* **5**, 102-110 (2002).
- 980 7 Consortium, T. I. A. G. Genome sequence of the pea aphid *Acyrtosiphon pisum*. *PLoS biology* **8**, e1000313,  
 981 doi:10.1371/journal.pbio.1000313 (2010).
- 982 8 Gerardo, N. M. *et al.* Immunity and other defenses in pea aphids, *Acyrtosiphon pisum*. *Genome biology* **11**,  
 983 R21, doi:10.1186/gb-2010-11-2-r21 (2010).
- 984 9 Panfilio, K. A. *et al.* Molecular evolutionary trends and feeding ecology diversification in the Hemiptera,  
 985 anchored by the milkweed bug genome. *bioRxiv*, doi:10.1101/201731 (2017).
- 986 10 Jenssen, H., Hamill, P. & Hancock, R. E. Peptide antimicrobial agents. *Clin Microbiol Rev* **19**, 491-511,  
 987 doi:10.1128/CMR.00056-05 (2006).
- 988 11 Vilcinskas, A. Evolutionary plasticity of insect immunity. *Journal of insect physiology* **59**, 123-129,  
 989 doi:10.1016/j.jinsphys.2012.08.018 (2013).
- 990 12 Jacobs, C. G. C., Van der Hulst, R., Chen, Y. T., Roth, S. & Van der Zee, M. *Immune function of the serosa in*  
 991 *a hemimetabolous insect egg* (2017).
- 992 13 Armisen, D. *et al.* Predator strike shapes antipredator phenotype through new genetic interactions in water



- 993 striders. *Nature communications* **6**, 8153, doi:10.1038/ncomms9153 (2015).
- 994 14 Khila, A., Abouheif, E. & Rowe, L. Evolution of a novel appendage ground plan in water striders is driven by  
995 changes in the Hox gene *Ultrabithorax*. *PLoS genetics* **5**, e1000583, doi:10.1371/journal.pgen.1000583 (2009).
- 996 15 Kalinka, A. T. *et al.* Gene expression divergence recapitulates the developmental hourglass model. *Nature* **468**,  
997 811-814, doi:10.1038/nature09634 (2010).
- 998 16 Refki, P. N. & Khila, A. Key patterning genes contribute to leg elongation in water striders. *Evodevo* **6**, 14,  
999 doi:10.1186/s13227-015-0015-5 (2015).
- 1000 17 Kirkness, E. F. *et al.* Genome sequences of the human body louse and its primary endosymbiont provide  
1001 insights into the permanent parasitic lifestyle. *Proceedings of the National Academy of Sciences of the United*  
1002 *States of America* **107**, 12168-12173, doi:10.1073/pnas.1003379107 (2010).
- 1003 18 Christiaens, O., Iga, M., Velarde, R. A., Rouge, P. & Smagghe, G. Halloween genes and nuclear receptors in  
1004 ecdysteroid biosynthesis and signalling in the pea aphid. *Insect molecular biology* **19 Suppl 2**, 187-200,  
1005 doi:10.1111/j.1365-2583.2009.00957.x (2010).
- 1006 19 Shigenobu, S. *et al.* Comprehensive survey of developmental genes in the pea aphid, *Acyrtosiphon pisum*:  
1007 frequent lineage-specific duplications and losses of developmental genes. *Insect molecular biology* **19 Suppl 2**,  
1008 47-62, doi:10.1111/j.1365-2583.2009.00944.x (2010).
- 1009 20 Naggan Perl, T., Schmid, B. G., Schwirz, J. & Chipman, A. D. The evolution of the knirps family of  
1010 transcription factors in arthropods. *Molecular biology and evolution* **30**, 1348-1357,  
1011 doi:10.1093/molbev/mst046 (2013).
- 1012 21 Watanabe, T., Takeuchi, H. & Kubo, T. Structural diversity and evolution of the N-terminal isoform-specific  
1013 region of ecdysone receptor-A and -B1 isoforms in insects. *BMC evolutionary biology* **10**, 40,  
1014 doi:10.1186/1471-2148-10-40 (2010).
- 1015 22 Dang, C. W. *et al.* The basic helix-loop-helix transcription factor family in the pea aphid, *Acyrtosiphon*  
1016 *pisum*. *J Insect Sci* **11**, 84, doi:10.1673/031.011.8401 (2011).
- 1017 23 Bitra, K., Tan, A., Dowling, A. & Palli, S. R. Functional characterization of PAS and HES family bHLH  
1018 transcription factors during the metamorphosis of the red flour beetle, *Tribolium castaneum*. *Gene* **448**, 74-87,  
1019 doi:10.1016/j.gene.2009.08.003 (2009).
- 1020 24 Baker, K. D. & Thummel, C. S. Diabetic larvae and obese flies-emerging studies of metabolism in *Drosophila*.  
1021 *Cell Metab* **6**, 257-266, doi:10.1016/j.cmet.2007.09.002 (2007).
- 1022 25 Edgar, B. A. How flies get their size: genetics meets physiology. *Nature reviews. Genetics* **7**, 907-916,

- 1023 doi:10.1038/nrg1989 (2006).
- 1024 26 Martin, D. E. & Hall, M. N. The expanding TOR signaling network. *Current opinion in cell biology* **17**, 158-  
1025 166, doi:10.1016/j.ceb.2005.02.008 (2005).
- 1026 27 Junger, M. A. *et al.* The Drosophila forkhead transcription factor FOXO mediates the reduction in cell number  
1027 associated with reduced insulin signaling. *J Biol* **2**, 20, doi:10.1186/1475-4924-2-20 (2003).
- 1028 28 Puig, O. & Tjian, R. Transcriptional feedback control of insulin receptor by dFOXO/FOXO1. *Genes &*  
1029 *development* **19**, 2435-2446, doi:10.1101/gad.1340505 (2005).
- 1030 29 Kapahi, P. *et al.* Regulation of lifespan in Drosophila by modulation of genes in the TOR signaling pathway.  
1031 *Current biology : CB* **14**, 885-890, doi:10.1016/j.cub.2004.03.059 (2004).
- 1032 30 Wang, M. C., Bohmann, D. & Jasper, H. JNK extends life span and limits growth by antagonizing cellular and  
1033 organism-wide responses to insulin signaling. *Cell* **121**, 115-125, doi:10.1016/j.cell.2005.02.030 (2005).
- 1034 31 Wullschleger, S., Loewith, R. & Hall, M. N. TOR signaling in growth and metabolism. *Cell* **124**, 471-484,  
1035 doi:10.1016/j.cell.2006.01.016 (2006).
- 1036 32 Emlen, D. J., Szafran, Q., Corley, L. S. & Dworkin, I. Insulin signaling and limb-patterning: candidate  
1037 pathways for the origin and evolutionary diversification of beetle 'horns'. *Heredity (Edinb)* **97**, 179-191,  
1038 doi:10.1038/sj.hdy.6800868 (2006).
- 1039 33 Hattori, A. *et al.* Soldier morphogenesis in the damp-wood termite is regulated by the insulin signaling  
1040 pathway. *Journal of experimental zoology. Part B, Molecular and developmental evolution* **320**, 295-306,  
1041 doi:10.1002/jez.b.22501 (2013).
- 1042 34 Patel, A. *et al.* The making of a queen: TOR pathway is a key player in diphenic caste development. *PloS one*  
1043 **2**, e509, doi:10.1371/journal.pone.0000509 (2007).
- 1044 35 Emlen, D. J., Warren, I. A., Johns, A., Dworkin, I. & Lavine, L. C. A mechanism of extreme growth and  
1045 reliable signaling in sexually selected ornaments and weapons. *Science* **337**, 860-864,  
1046 doi:10.1126/science.1224286 (2012).
- 1047 36 Snell-Rood, E. C. & Moczek, A. P. Insulin signaling as a mechanism underlying developmental plasticity: the  
1048 role of FOXO in a nutritional polyphenism. *PloS one* **7**, e34857, doi:10.1371/journal.pone.0034857 (2012).
- 1049 37 Murat, S., Hopfen, C. & McGregor, A. P. The function and evolution of Wnt genes in arthropods. *Arthropod*  
1050 *Struct Dev* **39**, 446-452, doi:10.1016/j.asd.2010.05.007 (2010).
- 1051 38 Oberhofer, G., Grossmann, D., Siemanowski, J. L., Beissbarth, T. & Bucher, G. Wnt/beta-catenin signaling  
1052 integrates patterning and metabolism of the insect growth zone. *Development* **141**, 4740-4750,

- 1053 doi:10.1242/dev.112797 (2014).
- 1054 39 Janssen, R. *et al.* Conservation, loss, and redeployment of Wnt ligands in protostomes: implications for  
1055 understanding the evolution of segment formation. *BMC evolutionary biology* **10**, 374, doi:10.1186/1471-  
1056 2148-10-374 (2010).
- 1057 40 Beermann, A., Pruhs, R., Lutz, R. & Schroder, R. A context-dependent combination of Wnt receptors controls  
1058 axis elongation and leg development in a short germ insect. *Development* **138**, 2793-2805,  
1059 doi:10.1242/dev.063644 (2011).
- 1060 41 Rawlings, N. D., Barrett, A. J. & Finn, R. Twenty years of the MEROPS database of proteolytic enzymes, their  
1061 substrates and inhibitors. *Nucleic acids research* **44**, D343-350, doi:10.1093/nar/gkv1118 (2016).
- 1062 42 Turk, V. *et al.* Cysteine cathepsins: from structure, function and regulation to new frontiers. *Biochimica et*  
1063 *biophysica acta* **1824**, 68-88, doi:10.1016/j.bbapap.2011.10.002 (2012).
- 1064 43 Terra, W. R. & Ferreira, C. Insect digestive enzymes: properties, compartmentalization and function.  
1065 *Comparative Biochemistry and Physiology Part B: Comparative Biochemistry* **109**, 1-62,  
1066 doi:http://dx.doi.org/10.1016/0305-0491(94)90141-4 (1994).
- 1067 44 Terra, W. R. & Ferreira, C. in *Insect Molecular Biology and Biochemistry* 365-418 (Academic Press, 2012).
- 1068 45 Murdock, L. L. *et al.* Cysteine digestive proteinases in Coleoptera. *Comparative Biochemistry and Physiology*  
1069 *Part B: Comparative Biochemistry* **87**, 783-787, doi:http://dx.doi.org/10.1016/0305-0491(87)90388-9 (1987).
- 1070 46 Houseman, J. G. & Downe, A. E. R. Cathepsin D-like activity in the posterior midgut of hemipteran insects.  
1071 *Comparative Biochemistry and Physiology Part B: Comparative Biochemistry* **75**, 509-512,  
1072 doi:http://dx.doi.org/10.1016/0305-0491(83)90367-X (1983).
- 1073 47 Martynov, A. G., Elpidina, E. N., Perkin, L. & Oppert, B. Functional analysis of C1 family cysteine peptidases  
1074 in the larval gut of capital *Tenebrio molitor* and *Tribolium castaneum*. *BMC genomics* **16**, 75,  
1075 doi:10.1186/s12864-015-1306-x (2015).
- 1076 48 Perkin, L., Elpidina, E. N. & Oppert, B. Expression patterns of cysteine peptidase genes across the *Tribolium*  
1077 *castaneum* life cycle provide clues to biological function. *PeerJ* **4**, e1581, doi:10.7717/peerj.1581 (2016).
- 1078 49 Oppert, B., Elpidina, E. N., Toutges, M. & Mazumdar-Leighton, S. Microarray analysis reveals strategies of  
1079 *Tribolium castaneum* larvae to compensate for cysteine and serine protease inhibitors. *Comp Biochem Physiol*  
1080 *Part D Genomics Proteomics* **5**, 280-287, doi:10.1016/j.cbd.2010.08.001 (2010).
- 1081 50 Kollien, A. H., Waniek, P. J., Nisbet, A. J., Billingsley, P. F. & Schaub, G. A. Activity and sequence  
1082 characterization of two cysteine proteases in the digestive tract of the reduviid bug *Triatoma infestans*. *Insect*

- 1083 *molecular biology* **13**, 569-579, doi:10.1111/j.0962-1075.2004.00504.x (2004).
- 1084 51 Waniek, P. J., Pacheco Costa, J. E., Jansen, A. M., Costa, J. & Araujo, C. A. Cathepsin L of *Triatoma*  
 1085 *brasiliensis* (Reduviidae, Triatominae): sequence characterization, expression pattern and zymography. *Journal*  
 1086 *of insect physiology* **58**, 178-187, doi:10.1016/j.jinsphys.2011.11.008 (2012).
- 1087 52 Ribeiro, J. M. *et al.* An insight into the transcriptome of the digestive tract of the bloodsucking bug, *Rhodnius*  
 1088 *prolixus*. *PLoS Negl Trop Dis* **8**, e2594, doi:10.1371/journal.pntd.0002594 (2014).
- 1089 53 Novinec, M. & Lenarcic, B. Papain-like peptidases: structure, function, and evolution. *Biomol Concepts* **4**,  
 1090 287-308, doi:10.1515/bmc-2012-0054 (2013).
- 1091 54 Sakurai, M. *et al.* Distribution of tubulointerstitial nephritis antigen-like 1 and structural matrix proteins in  
 1092 mouse embryos during preimplantation development in vivo and in vitro. *Zygote* **22**, 259-265,  
 1093 doi:10.1017/S0967199412000469 (2014).
- 1094 55 Saito, H., Kurata, S. & Natori, S. Purification and characterization of a hemocyte proteinase of *Sarcophaga*,  
 1095 possibly participating in elimination of foreign substances. *European journal of biochemistry / FEBS* **209**, 939-  
 1096 944 (1992).
- 1097 56 Gruden, K., Popovic, T., Cimerman, N., Krizaj, I. & Strukelj, B. Diverse enzymatic specificities of digestive  
 1098 proteases, 'intestains', enable Colorado potato beetle larvae to counteract the potato defence mechanism. *Biol*  
 1099 *Chem* **384**, 305-310, doi:10.1515/BC.2003.034 (2003).
- 1100 57 Meyer, H. W. Visuelle Schlüsselreize für die Auslösung der Beutefanghandlung beim Bachwasserläufer *Velia*  
 1101 *caprai* (Hemiptera, Heteroptera). *Zeitschrift für vergleichende Physiologie* **72**, 260-297,  
 1102 doi:10.1007/bf00297783 (1971).
- 1103 58 Rowe, L. The costs of mating and mate choice in water striders. *Animal Behaviour* **48**, 1049-1056 (1994).
- 1104 59 Spence, J. R. & Anderson, N. Biology of water striders: interactions between systematics and ecology. *Annual*  
 1105 *Review of Entomology* **39**, 101-128 (1994).
- 1106 60 Dahmen, H. Eye specialisation in waterstriders: an adaptation to life in a flat world. *Journal of Comparative*  
 1107 *Physiology A* **169**, 623-632, doi:10.1007/bf00193552 (1991).
- 1108 61 Wolburg-Buchholz, K. The organization of the lamina ganglionaris of the hemipteran insects, *Notonecta*  
 1109 *glauca*, *Corixa punctata* and *Gerris lacustris*. *Cell Tissue Res* **197**, 39-59 (1979).
- 1110 62 Schneider, L. & Langer, H. *Die Struktur des Rhabdoms im „Doppelaug“ des Wasserläufers *Gerris lacustris*.*  
 1111 (Zeitschrift für Zellforschung und Mikroskopische Anatomie, 1969).
- 1112 63 Fischer, C., Mahner, M. & Wachmann, E. The rhabdom structure in the ommatidia of the Heteroptera

- 1113 (Insecta), and its phylogenetic significance. *Zoomorphology* **120**, 1-13, doi:10.1007/s004359900018 (2000).
- 1114 64 Frolov, R. & Weckström, M. Developmental changes in biophysical properties of photoreceptors in the  
1115 common water strider (*Gerris lacustris*): better performance at higher cost. *Journal of neurophysiology* **112**,  
1116 913-922 (2014).
- 1117 65 Schwind, R. Polarization vision in water insects and insects living on a moist substrate. *Journal of*  
1118 *Comparative Physiology A* **169**, 531-540, doi:10.1007/bf00193544 (1991).
- 1119 66 Bohn, H. & Täuber, U. Beziehungen zwischen der Wirkung polarisierten Lichtes auf das Elektretinogramm  
1120 und der Ultrastruktur des Auges von *Gerris lacustris* L. *Zeitschrift für vergleichende Physiologie* **72**, 32-53,  
1121 doi:10.1007/bf00299202 (1971).
- 1122 67 Bartsch, K. Polarization-sensitive photoreceptors of different spectral types in the compound eye of  
1123 waterstriders. *Naturwissenschaften* **82**, 292-293, doi:10.1007/bf01134528 (1995).
- 1124 68 Brody, T. & Cravchik, A. *Drosophila melanogaster* G protein-coupled receptors. *The Journal of cell biology*  
1125 **150**, F83-88 (2000).
- 1126 69 Senthilan, P. R. & Helfrich-Forster, C. Rhodopsin 7-The unusual Rhodopsin in *Drosophila*. *PeerJ* **4**, e2427,  
1127 doi:10.7717/peerj.2427 (2016).
- 1128 70 Colbourne, J. K. *et al.* The ecoresponsive genome of *Daphnia pulex*. *Science* **331**, 555-561,  
1129 doi:10.1126/science.1197761 (2011).
- 1130 71 Eriksson, B. J., Fredman, D., Steiner, G. & Schmid, A. Characterisation and localisation of the opsin protein  
1131 repertoire in the brain and retinas of a spider and an onychophoran. *BMC evolutionary biology* **13**, 186,  
1132 doi:10.1186/1471-2148-13-186 (2013).
- 1133 72 Hering, L. & Mayer, G. Analysis of the opsin repertoire in the tardigrade *Hypsibius dujardini* provides insights  
1134 into the evolution of opsin genes in panarthropoda. *Genome biology and evolution* **6**, 2380-2391,  
1135 doi:10.1093/gbe/evu193 (2014).
- 1136 73 Henze, M. J. & Oakley, T. H. The Dynamic Evolutionary History of Pancrustacean Eyes and Opsins.  
1137 *Integrative and comparative biology* **55**, 830-842, doi:10.1093/icb/icv100 (2015).
- 1138 74 Frentiu, F. D. *et al.* Adaptive evolution of color vision as seen through the eyes of butterflies. *Proceedings of*  
1139 *the National Academy of Sciences of the United States of America* **104 Suppl 1**, 8634-8640,  
1140 doi:10.1073/pnas.0701447104 (2007).
- 1141 75 Frentiu, F. D., Bernard, G. D., Sison-Mangus, M. P., Brower, A. V. & Briscoe, A. D. Gene duplication is an  
1142 evolutionary mechanism for expanding spectral diversity in the long-wavelength photopigments of butterflies.

- 1143 *Molecular biology and evolution* **24**, 2016-2028, doi:10.1093/molbev/msm132 (2007).
- 1144 76 Sharkey, C. R. *et al.* Overcoming the loss of blue sensitivity through opsin duplication in the largest animal  
1145 group, beetles. *Sci Rep* **7**, 8, doi:10.1038/s41598-017-00061-7 (2017).
- 1146 77 Briscoe, A. D. & Chittka, L. The evolution of color vision in insects. *Annu Rev Entomol* **46**, 471-510,  
1147 doi:10.1146/annurev.ento.46.1.471 (2001).
- 1148 78 Goldsmith, T. H. & Ruck, P. R. The spectral sensitivities of the dorsal ocelli of cockroaches and honeybees; an  
1149 electrophysiological study. *J Gen Physiol* **41**, 1171-1185 (1958).
- 1150 79 Benton, R. Multigene Family Evolution: Perspectives from Insect Chemoreceptors. *Trends in ecology &*  
1151 *evolution* **30**, 590-600, doi:10.1016/j.tree.2015.07.009 (2015).
- 1152 80 Joseph, R. M. & Carlson, J. R. Drosophila Chemoreceptors: A Molecular Interface Between the Chemical  
1153 World and the Brain. *Trends in genetics : TIG* **31**, 683-695, doi:10.1016/j.tig.2015.09.005 (2015).
- 1154 81 Mesquita, R. D. *et al.* Genome of *Rhodnius prolixus*, an insect vector of Chagas disease, reveals unique  
1155 adaptations to hematophagy and parasite infection. *Proceedings of the National Academy of Sciences of the*  
1156 *United States of America* **112**, 14936-14941, doi:10.1073/pnas.1506226112 (2015).
- 1157 82 Benoit, J. B. *et al.* Unique features of a global human ectoparasite identified through sequencing of the bed bug  
1158 genome. *Nature communications* **7**, 10165, doi:10.1038/ncomms10165 (2016).
- 1159 83 International Aphid Genomics, C. Genome sequence of the pea aphid *Acyrtosiphon pisum*. *PLoS biology* **8**,  
1160 e1000313, doi:10.1371/journal.pbio.1000313 (2010).
- 1161 84 Ioannidis, P. *et al.* Genomic features of the damselfly *Calopteryx splendens* representing a sister clade to most  
1162 insect orders. *Genome biology and evolution*, doi:10.1093/gbe/evx006 (2017).
- 1163 85 Missbach, C. *et al.* Evolution of insect olfactory receptors. *eLife* **3**, e02115, doi:10.7554/eLife.02115 (2014).
- 1164 86 Robertson, H. M. The Insect Chemoreceptor Superfamily Is Ancient in Animals. *Chem Senses* **40**, 609-614,  
1165 doi:10.1093/chemse/bjv046 (2015).
- 1166 87 Robertson, H. M., Warr, C. G. & Carlson, J. R. Molecular evolution of the insect chemoreceptor gene  
1167 superfamily in *Drosophila melanogaster*. *Proceedings of the National Academy of Sciences of the United States*  
1168 *of America* **100 Suppl 2**, 14537-14542, doi:10.1073/pnas.2335847100 (2003).
- 1169 88 Miyamoto, T., Slone, J., Song, X. & Amrein, H. A fructose receptor functions as a nutrient sensor in the  
1170 *Drosophila* brain. *Cell* **151**, 1113-1125, doi:10.1016/j.cell.2012.10.024 (2012).
- 1171 89 Rytz, R., Croset, V. & Benton, R. Ionotropic receptors (IRs): chemosensory ionotropic glutamate receptors in  
1172 *Drosophila* and beyond. *Insect biochemistry and molecular biology* **43**, 888-897,

- 1173 doi:10.1016/j.ibmb.2013.02.007 (2013).
- 1174 90 Croset, V., Schleyer, M., Arguello, J. R., Gerber, B. & Benton, R. A molecular and neuronal basis for amino  
1175 acid sensing in the *Drosophila* larva. *Sci Rep* **6**, 34871, doi:10.1038/srep34871 (2016).
- 1176 91 Ganguly, A. *et al.* A Molecular and Cellular Context-Dependent Role for Ir76b in Detection of Amino Acid  
1177 Taste. *Cell Rep* **18**, 737-750, doi:10.1016/j.celrep.2016.12.071 (2017).
- 1178 92 Enjin, A. *et al.* Humidity Sensing in *Drosophila*. *Current biology : CB* **26**, 1352-1358,  
1179 doi:10.1016/j.cub.2016.03.049 (2016).
- 1180 93 Knecht, Z. A. *et al.* Distinct combinations of variant ionotropic glutamate receptors mediate thermosensation  
1181 and hygrosensation in *Drosophila*. *eLife* **5**, doi:10.7554/eLife.17879 (2016).
- 1182 94 Hussain, A. *et al.* Ionotropic Chemosensory Receptors Mediate the Taste and Smell of Polyamines. *PLoS*  
1183 *biology* **14**, e1002454, doi:10.1371/journal.pbio.1002454 (2016).
- 1184 95 Min, S., Ai, M., Shin, S. A. & Suh, G. S. Dedicated olfactory neurons mediating attraction behavior to  
1185 ammonia and amines in *Drosophila*. *Proceedings of the National Academy of Sciences of the United States of*  
1186 *America* **110**, E1321-1329, doi:10.1073/pnas.1215680110 (2013).
- 1187 96 Ai, M. *et al.* Acid sensing by the *Drosophila* olfactory system. *Nature* **468**, 691-695, doi:10.1038/nature09537  
1188 (2010).
- 1189 97 Gorter, J. A. *et al.* The nutritional and hedonic value of food modulate sexual receptivity in *Drosophila*  
1190 *melanogaster* females. *Sci Rep* **6**, 19441, doi:10.1038/srep19441 (2016).
- 1191 98 Grosjean, Y. *et al.* An olfactory receptor for food-derived odours promotes male courtship in *Drosophila*.  
1192 *Nature* **478**, 236-240, doi:10.1038/nature10428 (2011).
- 1193 99 Prieto-Godino, L. L. *et al.* Olfactory receptor pseudo-pseudogenes. *Nature* **539**, 93-97,  
1194 doi:10.1038/nature19824 (2016).
- 1195 100 Prieto-Godino, L. L. *et al.* Evolution of Acid-Sensing Olfactory Circuits in *Drosophilids*. *Neuron* **93**, 661-676  
1196 e666, doi:10.1016/j.neuron.2016.12.024 (2017).
- 1197 101 Koh, T. W. *et al.* The *Drosophila* IR20a clade of ionotropic receptors are candidate taste and pheromone  
1198 receptors. *Neuron* **83**, 850-865, doi:10.1016/j.neuron.2014.07.012 (2014).
- 1199 102 Stewart, S., Koh, T. W., Ghosh, A. C. & Carlson, J. R. Candidate ionotropic taste receptors in the *Drosophila*  
1200 larva. *Proceedings of the National Academy of Sciences of the United States of America* **112**, 4195-4201,  
1201 doi:10.1073/pnas.1503292112 (2015).
- 1202 103 Ffrench-Constant, R. H., Daborn, P. J. & Le Goff, G. The genetics and genomics of insecticide resistance.

- 1203 *Trends in genetics : TIG* **20**, 163-170, doi:10.1016/j.tig.2004.01.003 (2004).
- 1204 104 Scott, J. G. Cytochromes P450 and insecticide resistance. *Insect biochemistry and molecular biology* **29**, 757-  
1205 777 (1999).
- 1206 105 Rewitz, K. F., O'Connor, M. B. & Gilbert, L. I. Molecular evolution of the insect Halloween family of  
1207 cytochrome P450s: phylogeny, gene organization and functional conservation. *Insect biochemistry and*  
1208 *molecular biology* **37**, 741-753, doi:10.1016/j.ibmb.2007.02.012 (2007).
- 1209 106 Helvig, C., Koener, J. F., Unnithan, G. C. & Feyereisen, R. CYP15A1, the cytochrome P450 that catalyzes  
1210 epoxidation of methyl farnesoate to juvenile hormone III in cockroach corpora allata. *Proceedings of the*  
1211 *National Academy of Sciences of the United States of America* **101**, 4024-4029, doi:10.1073/pnas.0306980101  
1212 (2004).
- 1213 107 Good, R. T. *et al.* The molecular evolution of cytochrome P450 genes within and between drosophila species.  
1214 *Genome biology and evolution* **6**, 1118-1134, doi:10.1093/gbe/evu083 (2014).
- 1215 108 Lao, S. H. *et al.* Genomic and transcriptomic insights into the cytochrome P450 monooxygenase gene  
1216 repertoire in the rice pest brown planthopper, *Nilaparvata lugens*. *Genomics* **106**, 301-309,  
1217 doi:10.1016/j.ygeno.2015.07.010 (2015).
- 1218 109 Schama, R. *et al.* *Rhodnius prolixus* supergene families of enzymes potentially associated with insecticide  
1219 resistance. *Insect biochemistry and molecular biology* **69**, 91-104, doi:10.1016/j.ibmb.2015.06.005 (2016).
- 1220 110 Morello, A. & Repetto, Y. UDP-glucosyltransferase activity of housefly microsomal fraction. *The Biochemical*  
1221 *journal* **177**, 809-812 (1979).
- 1222 111 Real, M. D., Ferre, J. & Chapa, F. J. UDP-glucosyltransferase activity toward exogenous substrates in  
1223 *Drosophila melanogaster*. *Analytical biochemistry* **194**, 349-352 (1991).
- 1224 112 Ahmad, S. A. & Hopkins, T. L. Phenol  $\beta$ -glucosyltransferase and  $\beta$ -glucosidase activities in the tobacco  
1225 hornworm larva *Manduca sexta* (L.): Properties and tissue localization. *Archives of Insect Biochemistry and*  
1226 *Physiology* **21**, 207-224, doi:10.1002/arch.940210305 (1992).
- 1227 113 Luque, T., Okano, K. & O'Reilly, D. R. Characterization of a novel silkworm (*Bombyx mori*) phenol UDP-  
1228 glucosyltransferase. *European journal of biochemistry / FEBS* **269**, 819-825 (2002).
- 1229 114 Ahmad, S. A. & Hopkins, T. L. Phenol  $\beta$ -glucosyltransferases in six species of insects: properties and tissue  
1230 localization. *Comparative Biochemistry and Physiology Part B: Comparative Biochemistry* **104**, 515-519,  
1231 doi:10.1016/0305-0491(93)90276-B (1993).
- 1232 115 Ahn, S. J., Badenes-Perez, F. R. & Heckel, D. G. A host-plant specialist, *Helicoverpa assulta*, is more tolerant



- 1233 to capsaicin from *Capsicum annuum* than other noctuid species. *Journal of insect physiology* **57**, 1212-1219,  
 1234 doi:10.1016/j.jinsphys.2011.05.015 (2011).
- 1235 116 Daimon, T. *et al.* The silkworm Green b locus encodes a quercetin 5-O-glucosyltransferase that produces green  
 1236 cocoons with UV-shielding properties. *Proceedings of the National Academy of Sciences of the United States*  
 1237 *of America* **107**, 11471-11476, doi:10.1073/pnas.1000479107 (2010).
- 1238 117 Kojima, W., Fujii, T., Suwa, M., Miyazawa, M. & Ishikawa, Y. Physiological adaptation of the Asian corn  
 1239 borer *Ostrinia furnacalis* to chemical defenses of its host plant, maize. *Journal of insect physiology* **56**, 1349-  
 1240 1355, doi:10.1016/j.jinsphys.2010.04.021 (2010).
- 1241 118 Lee, H.-S., Hieu, T. & Ahn, Y.-J. Oviposition-stimulating activity of (E)-capsaicin identified in *Capsicum*  
 1242 *annuum* fruit and related compounds towards *Helicoverpa assulta* (Lepidoptera: Noctuidae). *Chemoecology* **16**,  
 1243 153-157, doi:10.1007/s00049-006-0341-0 (2006).
- 1244 119 Sasai, H. *et al.* Species-specific glucosylation of DIMBOA in larvae of the rice Armyworm. *Bioscience,*  
 1245 *biotechnology, and biochemistry* **73**, 1333-1338, doi:10.1271/bbb.80903 (2009).
- 1246 120 Wang, Q., Hasan, G. & Pikielny, C. W. Preferential expression of biotransformation enzymes in the olfactory  
 1247 organs of *Drosophila melanogaster*, the antennae. *The Journal of biological chemistry* **274**, 10309-10315  
 1248 (1999).
- 1249 121 Younus, F. *et al.* Identification of candidate odorant degrading gene/enzyme systems in the antennal  
 1250 transcriptome of *Drosophila melanogaster*. *Insect biochemistry and molecular biology* **53**, 30-43,  
 1251 doi:10.1016/j.ibmb.2014.07.003 (2014).
- 1252 122 Bozzolan, F. *et al.* Antennal uridine diphosphate (UDP)-glycosyltransferases in a pest insect: diversity and  
 1253 putative function in odorant and xenobiotics clearance. *Insect molecular biology* **23**, 539-549,  
 1254 doi:10.1111/imb.12100 (2014).
- 1255 123 Svoboda, J. A. & Weirich, G. F. Sterol metabolism in the tobacco hornworm, *Manduca sexta*--a review. *Lipids*  
 1256 **30**, 263-267 (1995).
- 1257 124 Ahmad, S. A., Hopkins, T. L. & Kramer, K. J. Tyrosine  $\beta$ -Glucosyltransferase in the tobacco hornworm,  
 1258 *Manduca sexta* (L.): properties, tissue localization, and developmental profile. *Insect biochemistry and*  
 1259 *molecular biology* **26**, 49-57, doi:10.1016/0965-1748(95)00060-7 (1996).
- 1260 125 Hopkins, T. L. & Kramer, J. B. Insect Cuticle Sclerotization. *Annu Rev Entomol* **37**, 273-302,  
 1261 doi:doi:10.1146/annurev.en.37.010192.001421 (1992).
- 1262 126 Wiesen, B., Krug, E., Fiedler, K., Wray, V. & Proksch, P. Sequestration of host-plant-derived flavonoids by

- 1263 lycaenid butterfly *Polyommatus icarus*. *Journal of chemical ecology* **20**, 2523-2538, doi:10.1007/BF02036189  
 1264 (1994).
- 1265 127 Jensen, N. B. *et al.* Convergent evolution in biosynthesis of cyanogenic defence compounds in plants and  
 1266 insects. *Nature communications* **2**, 273, doi:10.1038/ncomms1271 (2011).
- 1267 128 Ahn, S. J., Vogel, H. & Heckel, D. G. Comparative analysis of the UDP-glycosyltransferase multigene family  
 1268 in insects. *Insect biochemistry and molecular biology* **42**, 133-147, doi:10.1016/j.ibmb.2011.11.006 (2012).
- 1269 129 Simpson, S. J., Sword, G. A. & Lo, N. Polyphenism in insects. *Current biology : CB* **21**, R738-749,  
 1270 doi:10.1016/j.cub.2011.06.006 (2011).
- 1271 130 Roff, D. A. The Evolution of Wing Dimorphism in Insects. *Evolution; international journal of organic*  
 1272 *evolution* **40**, 1009-1020, doi:10.2307/2408759 (1986).
- 1273 131 Harada, T. & Taneda, K. Seasonal changes in alary dimorphism of a water strider, *Gerris paludum insularis*  
 1274 (*Motschulsky*). *Journal of insect physiology* **35**, 919-924 (1989).
- 1275 132 Vepsäläinen, K. Determination of wing length and diapause in water-striders (*Gerris fabr.*, heteroptera).  
 1276 *Hereditas* **77**, 163-176 (1974).
- 1277 133 Vepsäläinen, K. in *Evolution of Insect Migration and Diapause Proceedings in Life Sciences* (ed Hugh  
 1278 Dingle) Ch. 10, 218-253 (Springer US, 1978).
- 1279 134 Suen, G. *et al.* The genome sequence of the leaf-cutter ant *Atta cephalotes* reveals insights into its obligate  
 1280 symbiotic lifestyle. *PLoS genetics* **7**, e1002007, doi:10.1371/journal.pgen.1002007 (2011).
- 1281 135 Smith, C. R. *et al.* Draft genome of the red harvester ant *Pogonomyrmex barbatus*. *Proceedings of the National*  
 1282 *Academy of Sciences of the United States of America* **108**, 5667-5672, doi:10.1073/pnas.1007901108 (2011).
- 1283 136 Smith, C. D. *et al.* Draft genome of the globally widespread and invasive Argentine ant (*Linepithema humile*).  
 1284 *Proceedings of the National Academy of Sciences of the United States of America* **108**, 5673-5678,  
 1285 doi:10.1073/pnas.1008617108 (2011).
- 1286 137 Brisson, J. A. Aphid wing dimorphisms: linking environmental and genetic control of trait variation.  
 1287 *Philosophical transactions of the Royal Society of London. Series B, Biological sciences* **365**, 605-616,  
 1288 doi:10.1098/rstb.2009.0255 (2010).
- 1289 138 Elango, N., Hunt, B. G., Goodisman, M. A. & Yi, S. V. DNA methylation is widespread and associated with  
 1290 differential gene expression in castes of the honeybee, *Apis mellifera*. *Proceedings of the National Academy of*  
 1291 *Sciences of the United States of America* **106**, 11206-11211, doi:10.1073/pnas.0900301106 (2009).
- 1292 139 Nijhout, H. F. Development and evolution of adaptive polyphenisms. *Evolution & development* **5**, 9-18 (2003).

- 1293 140 Nijhout, H. F. Insect polyphenisms and adaptation. *American Zoologist* **41**, 1540-1540 (2001).
- 1294 141 Xu, H. J. *et al.* Two insulin receptors determine alternative wing morphs in planthoppers. *Nature* **519**, 464-467,  
1295 doi:10.1038/nature14286 (2015).
- 1296 142 Nijhout, H. F. Control Mechanisms of Polyphenic Development in Insects: In polyphenic development,  
1297 environmental factors alter some aspects of development in an orderly and predictable way. *Bioscience* **49**,  
1298 181-192 (1999).
- 1299 143 Alvarado, S., Rajakumar, R., Abouheif, E. & Szyf, M. Epigenetic variation in the *Egfr* gene generates  
1300 quantitative variation in a complex trait in ants. *Nature communications* **6**, 6513, doi:10.1038/ncomms7513  
1301 (2015).
- 1302 144 Foret, S. *et al.* DNA methylation dynamics, metabolic fluxes, gene splicing, and alternative phenotypes in  
1303 honey bees. *Proceedings of the National Academy of Sciences of the United States of America* **109**, 4968-4973,  
1304 doi:10.1073/pnas.1202392109 (2012).
- 1305 145 Li-Byarlay, H. *et al.* RNA interference knockdown of DNA methyl-transferase 3 affects gene alternative  
1306 splicing in the honey bee. *Proceedings of the National Academy of Sciences of the United States of America*  
1307 **110**, 12750-12755, doi:10.1073/pnas.1310735110 (2013).
- 1308 146 Kucharski, R., Maleszka, J., Foret, S. & Maleszka, R. Nutritional control of reproductive status in honeybees  
1309 via DNA methylation. *Science* **319**, 1827-1830, doi:10.1126/science.1153069 (2008).
- 1310 147 Herb, B. R. *et al.* Reversible switching between epigenetic states in honeybee behavioral subcastes. *Nature*  
1311 *neuroscience* **15**, 1371-1373, doi:10.1038/nn.3218 (2012).
- 1312 148 Glastad, K. M., Hunt, B. G., Yi, S. V. & Goodisman, M. A. DNA methylation in insects: on the brink of the  
1313 epigenomic era. *Insect molecular biology* **20**, 553-565, doi:10.1111/j.1365-2583.2011.01092.x (2011).
- 1314 149 Bewick, A. J., Vogel, K. J., Moore, A. J. & Schmitz, R. J. Evolution of DNA Methylation across Insects.  
1315 *Molecular biology and evolution* **34**, 654-665, doi:10.1093/molbev/msw264 (2017).
- 1316 150 Walsh, T. K. *et al.* A functional DNA methylation system in the pea aphid, *Acyrtosiphon pisum*. *Insect*  
1317 *molecular biology* **19 Suppl 2**, 215-228, doi:10.1111/j.1365-2583.2009.00974.x (2010).
- 1318 151 Vandegehuchte, M. B. *et al.* Occurrence of DNA methylation in *Daphnia magna* and influence of  
1319 multigeneration Cd exposure. *Environ Int* **35**, 700-706, doi:10.1016/j.envint.2009.01.002 (2009).
- 1320 152 Terrapon, N. *et al.* Molecular traces of alternative social organization in a termite genome. *Nature*  
1321 *communications* **5**, 3636, doi:10.1038/ncomms4636 (2014).
- 1322 153 Bonasio, R. *et al.* Genomic comparison of the ants *Camponotus floridanus* and *Harpegnathos saltator*. *Science*

- 1323           **329**, 1068-1071, doi:10.1126/science.1192428 (2010).
- 1324 154   Wang, Y. *et al.* Functional CpG methylation system in a social insect. *Science* **314**, 645-647,  
1325           doi:10.1126/science.1135213 (2006).
- 1326 155   Duncan, E. J., Gluckman, P. D. & Dearden, P. K. Epigenetics, plasticity, and evolution: How do we link  
1327           epigenetic change to phenotype? *Journal of experimental zoology. Part B, Molecular and developmental*  
1328           *evolution* **322**, 208-220, doi:10.1002/jez.b.22571 (2014).
- 1329 156   Andersen, N. M., xf & Iler. The Evolution of Wing Polymorphism in Water Striders (Gerridae): A  
1330           Phylogenetic Approach. *Oikos* **67**, 433-443, doi:10.2307/3545355 (1993).
- 1331 157   Andersen, N. M. *The semiaquatic bugs*. Vol. 3 (SCANDINAVIAN SCIENCE PRESS LTD, 1982).
- 1332 158   Fairbairn, D. J. & King, E. Why do Californian striders fly? *Journal of evolutionary biology* **22**, 36-49,  
1333           doi:10.1111/j.1420-9101.2008.01619.x (2009).
- 1334 159   Arnqvist, G. & Rowe, L. *Sexual Conflict*. (Princeton University Press, 2005).
- 1335 160   McKay, D. J. *et al.* Interrogating the function of metazoan histones using engineered gene clusters.  
1336           *Developmental cell* **32**, 373-386, doi:10.1016/j.devcel.2014.12.025 (2015).
- 1337 161   Conrad, T. *et al.* The MOF chromobarrel domain controls genome-wide H4K16 acetylation and spreading of  
1338           the MSL complex. *Developmental cell* **22**, 610-624, doi:10.1016/j.devcel.2011.12.016 (2012).
- 1339 162   Pushpavalli, S. N. *et al.* Drosophila MOF controls Checkpoint protein2 and regulates genomic stability during  
1340           early embryogenesis. *BMC molecular biology* **14**, 1, doi:10.1186/1471-2199-14-1 (2013).
- 1341 163   Rider, S. D., Jr., Srinivasan, D. G. & Hilgarth, R. S. Chromatin-remodelling proteins of the pea aphid,  
1342           Acyrtosiphon pisum (Harris). *Insect molecular biology* **19 Suppl 2**, 201-214, doi:10.1111/j.1365-  
1343           2583.2009.00972.x (2010).
- 1344 164   Furuyama, T., Banerjee, R., Breen, T. R. & Harte, P. J. SIR2 is required for polycomb silencing and is  
1345           associated with an E(Z) histone methyltransferase complex. *Current biology : CB* **14**, 1812-1821,  
1346           doi:10.1016/j.cub.2004.09.060 (2004).
- 1347 165   Rogina, B. & Helfand, S. L. Sir2 mediates longevity in the fly through a pathway related to calorie restriction.  
1348           *Proceedings of the National Academy of Sciences of the United States of America* **101**, 15998-16003,  
1349           doi:10.1073/pnas.0404184101 (2004).
- 1350 166   Tissenbaum, H. A. & Guarente, L. Increased dosage of a sir-2 gene extends lifespan in *Caenorhabditis elegans*.  
1351           *Nature* **410**, 227-230, doi:10.1038/35065638 (2001).
- 1352 167   List, O. *et al.* Overexpression of grappa encoding a histone methyltransferase enhances stress resistance in

- 1353 *Drosophila*. *Hereditas* **146**, 19-28, doi:10.1111/j.1601-5223.2008.02080.x (2009).
- 1354 168 Bi, J. L. & Felton, G. W. Foliar oxidative stress and insect herbivory: Primary compounds, secondary  
1355 metabolites, and reactive oxygen species as components of induced resistance. *Journal of chemical ecology* **21**,  
1356 1511-1530, doi:10.1007/BF02035149 (1995).
- 1357 169 Mittapalli, O., Neal, J. J. & Shukle, R. H. Antioxidant defense response in a galling insect. *Proceedings of the*  
1358 *National Academy of Sciences of the United States of America* **104**, 1889-1894, doi:10.1073/pnas.0604722104  
1359 (2007).
- 1360 170 Pardini, R. S. Toxicity of oxygen from naturally occurring redox-active pro-oxidants. *Arch Insect Biochem*  
1361 *Physiol* **29**, 101-118, doi:10.1002/arch.940290203 (1995).
- 1362 171 Corona, M. & Robinson, G. E. Genes of the antioxidant system of the honey bee: annotation and phylogeny.  
1363 *Insect molecular biology* **15**, 687-701, doi:10.1111/j.1365-2583.2006.00695.x (2006).
- 1364 172 Felton, G. W. & Summers, C. B. Antioxidant systems in insects. *Arch Insect Biochem Physiol* **29**, 187-197,  
1365 doi:10.1002/arch.940290208 (1995).
- 1366 173 Shi, G. Q., Yu, Q. Y. & Zhang, Z. Annotation and evolution of the antioxidant genes in the silkworm, *Bombyx*  
1367 *mori*. *Arch Insect Biochem Physiol* **79**, 87-103, doi:10.1002/arch.21014 (2012).
- 1368 174 Gnerre, S. *et al.* High-quality draft assemblies of mammalian genomes from massively parallel sequence data.  
1369 *Proceedings of the National Academy of Sciences of the United States of America* **108**, 1513-1518,  
1370 doi:10.1073/pnas.1017351108 (2011).
- 1371 175 Cantarel, B. L. *et al.* MAKER: an easy-to-use annotation pipeline designed for emerging model organism  
1372 genomes. *Genome research* **18**, 188-196, doi:10.1101/gr.6743907 (2008).
- 1373 176 Stanke, M., Diekhans, M., Baertsch, R. & Haussler, D. Using native and syntenically mapped cDNA  
1374 alignments to improve de novo gene finding. *Bioinformatics* **24**, 637-644, doi:10.1093/bioinformatics/btn013  
1375 (2008).
- 1376 177 Korf, I. Gene finding in novel genomes. *BMC Bioinformatics* **5**, 59, doi:10.1186/1471-2105-5-59 (2004).
- 1377 178 Poelchau, M. *et al.* The i5k Workspace@NAL--enabling genomic data access, visualization and curation of  
1378 arthropod genomes. *Nucleic acids research* **43**, D714-719, doi:10.1093/nar/gku983 (2015).
- 1379 179 Lee, E. *et al.* Web Apollo: a web-based genomic annotation editing platform. *Genome biology* **14**, R93,  
1380 doi:10.1186/gb-2013-14-8-r93 (2013).
- 1381 180 Gramates, L. S. *et al.* FlyBase at 25: looking to the future. *Nucleic acids research* **45**, D663-D671,  
1382 doi:10.1093/nar/gkw1016 (2017).

- 1383 181 Willis, J. H. Structural cuticular proteins from arthropods: annotation, nomenclature, and sequence  
 1384 characteristics in the genomics era. *Insect biochemistry and molecular biology* **40**, 189-204,  
 1385 doi:10.1016/j.ibmb.2010.02.001 (2010).
- 1386 182 Ioannidou, Z. S., Theodoropoulou, M. C., Papandreou, N. C., Willis, J. H. & Hamodrakas, S. J. CutProtFam-  
 1387 Pred: detection and classification of putative structural cuticular proteins from sequence alone, based on profile  
 1388 hidden Markov models. *Insect biochemistry and molecular biology* **52**, 51-59, doi:10.1016/j.ibmb.2014.06.004  
 1389 (2014).
- 1390 183 Bird, A. P. DNA methylation and the frequency of CpG in animal DNA. *Nucleic acids research* **8**, 1499-1504  
 1391 (1980).
- 1392 184 Weber, M. *et al.* Distribution, silencing potential and evolutionary impact of promoter DNA methylation in the  
 1393 human genome. *Nature genetics* **39**, 457-466, doi:10.1038/ng1990 (2007).
- 1394 185 Wang, L., Wang, S., Li, Y., Paradesi, M. S. & Brown, S. J. BeetleBase: the model organism database for  
 1395 *Tribolium castaneum*. *Nucleic acids research* **35**, D476-479, doi:10.1093/nar/gkl776 (2007).
- 1396 186 Misra, J. R., Horner, M. A., Lam, G. & Thummel, C. S. Transcriptional regulation of xenobiotic detoxification  
 1397 in *Drosophila*. *Genes & development* **25**, 1796-1806, doi:10.1101/gad.17280911 (2011).
- 1398 187 Wallace, I. M., O'Sullivan, O., Higgins, D. G. & Notredame, C. M-Coffee: combining multiple sequence  
 1399 alignment methods with T-Coffee. *Nucleic acids research* **34**, 1692-1699, doi:10.1093/nar/gkl091 (2006).
- 1400 188 Capella-Gutierrez, S., Silla-Martinez, J. M. & Gabaldon, T. trimAl: a tool for automated alignment trimming in  
 1401 large-scale phylogenetic analyses. *Bioinformatics* **25**, 1972-1973, doi:10.1093/bioinformatics/btp348 (2009).
- 1402 189 Tamura, K., Stecher, G., Peterson, D., Filipski, A. & Kumar, S. MEGA6: Molecular Evolutionary Genetics  
 1403 Analysis version 6.0. *Molecular biology and evolution* **30**, 2725-2729, doi:10.1093/molbev/mst197 (2013).
- 1404 190 Jones, D. T., Taylor, W. R. & Thornton, J. M. The rapid generation of mutation data matrices from protein  
 1405 sequences. *Comput Appl Biosci* **8**, 275-282 (1992).
- 1406 191 Norga, K. K. *et al.* Quantitative analysis of bristle number in *Drosophila* mutants identifies genes involved in  
 1407 neural development. *Current biology : CB* **13**, 1388-1396 (2003).
- 1408 192 Gao, N., Foster, R. G. & Hardie, J. Two opsin genes from the vetch aphid, *Megoura viciae*. *Insect molecular  
 1409 biology* **9**, 197-202 (2000).
- 1410 193 Wakakuwa, M., Stewart, F., Matsumoto, Y., Matsunaga, S. & Arikawa, K. Physiological basis of phototaxis to  
 1411 near-infrared light in *Nephotettix cincticeps*. *J Comp Physiol A Neuroethol Sens Neural Behav Physiol* **200**,  
 1412 527-536, doi:10.1007/s00359-014-0892-4 (2014).

- 1413 194 Döring, T. F., Kirchner, S. M., Skorupski, P. & Hardie, J. I. M. Spectral sensitivity of the green photoreceptor  
1414 of winged pea aphids. *Physiological Entomology* **36**, 392-396, doi:10.1111/j.1365-3032.2011.00805.x (2011).
- 1415 195 Ai, J. *et al.* Genome-wide analysis of cytochrome P450 monooxygenase genes in the silkworm, *Bombyx mori*.  
1416 *Gene* **480**, 42-50, doi:10.1016/j.gene.2011.03.002 (2011).
- 1417 196 The Honeybee Genome Sequencing, C. Insights into social insects from the genome of the honeybee *Apis*  
1418 *mellifera*. *Nature* **443**, 931, doi:10.1038/nature05260  
1419 <https://www.nature.com/articles/nature05260#supplementary-information> (2006).
- 1420 197 Zhu, F., Moural, T. W., Shah, K. & Palli, S. R. Integrated analysis of cytochrome P450 gene superfamily in the  
1421 red flour beetle, *Tribolium castaneum*. *BMC genomics* **14**, 174, doi:10.1186/1471-2164-14-174 (2013).
- 1422 198 Lyko, F. *et al.* The honey bee epigenomes: differential methylation of brain DNA in queens and workers. *PLoS*  
1423 *biology* **8**, e1000506, doi:10.1371/journal.pbio.1000506 (2010).
- 1424
